# Supplementary material for: Synthesis of mixed phosphorotrithioates from white phosphorus
Source: Royal Society of Chemistry journal article supplement (doi:10.1039/d0gc02985h), 2020-01-01

## Electronic Supplementary Information

for

### Synthesis of mixed phosphorotrithioates from white phosphorus

Xinlei Huangfu, Yue Zhang, Peiyun Chen, Guozhang Lu, Yinwei Cao, Guo Tang,\*  
and Yufen Zhao

Department of Chemistry, College of Chemistry and Chemical Engineering, and the Key  
Laboratory for Chemical Biology of Fujian Province, Xiamen University, Xiamen, Fujian  
361005, China

E-mail: [t12g21@xmu.edu.cn](mailto:t12g21@xmu.edu.cn)

|                                                                                                  |         |
|--------------------------------------------------------------------------------------------------|---------|
| General information                                                                              | S2      |
| Safety note for P <sub>4</sub> :                                                                 | S2      |
| Preparation of P <sub>4</sub> -toluene solution:                                                 | S2      |
| Formation of salt <b>43</b> monitored by <sup>31</sup> P NMR spectroscopy and HRMS:              | S2      |
| Reaction mechanism                                                                               | S5      |
| Spectral data                                                                                    | S6–S14  |
| <sup>1</sup> H, <sup>13</sup> C, <sup>31</sup> P and <sup>19</sup> F NMR spectra of all products | S15-S72 |

### General Information:

Spectroscopy data of the known compounds matches with the data reported in the corresponding references.  $^1\text{H}$ ,  $^{13}\text{C}$ ,  $^{31}\text{P}$  and  $^{19}\text{F}$  NMR spectra were recorded on a Bruker Av400 spectrometer using tetramethylsilane (TMS) in  $\text{CDCl}_3$  as the internal standard for  $^1\text{H}$ , and  $^{13}\text{C}$  NMR ( $^1\text{H}$  NMR: TMS at 0.00 ppm,  $\text{CHCl}_3$  at 7.26 ppm;  $^{13}\text{C}$  NMR:  $\text{CDCl}_3$  at 77.23 ppm) and 85%  $\text{H}_3\text{PO}_4$  as external standard for  $^{31}\text{P}$  NMR. Data are represented as follows: chemical shift, multiplicity (s = singlet, d = doublet, t = triplet, quint = quintet, m = multiplet), coupling constants in Hertz (Hz), integration. The products were purified by Column chromatography on silica gel 300 – 400 mesh. All products were further characterized by HRMS (FT-ICR-MS) and an electrospray ionization source in positive-ion mode.

### Experimental Section

**Safety note for  $\text{P}_4$ :** White phosphorus is spontaneously flammable; it should be stored in water or glove box. On the other hand, white phosphorus is soluble in toluene.

**Preparation of  $\text{P}_4$ -toluene solution:** A piece of white phosphorus was taken out of water and then put in ethanol under argon. One minute later, white phosphorus was taken out and the surface ethanol was blown off with argon. Then, the dry white phosphorus was put in a round bottomed flask containing toluene. White phosphorus-toluene solution prepared with 0.1 mol/L (12.4 g/L) should be sealed in argon and stored away from light.

### Formation of salt **43** monitored by $^{31}\text{P}$ NMR spectroscopy and HRMS

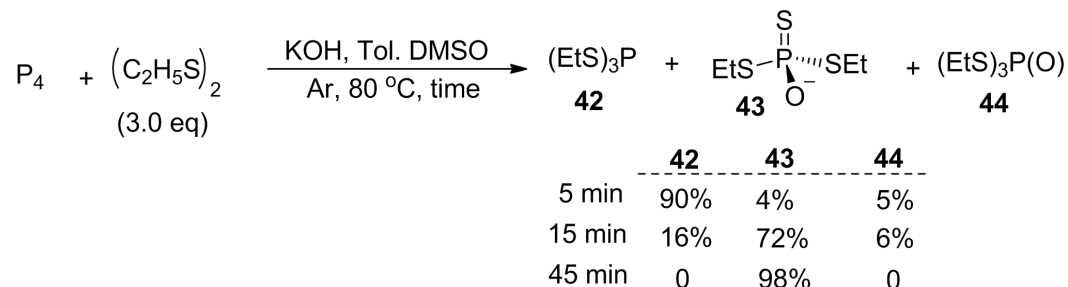

**Fig. 1** The starting  $\text{P}_4$  showed signal in the  $^{31}\text{P}$  NMR spectrum at  $\delta = -519$  ppm.

**Fig. 2**  $(\text{C}_2\text{H}_5\text{S})_2$  (3.0 equiv) and KOH were added to the solution of  $\text{P}_4$ , the reaction was conducted under standard conditions; the expected phosphorotrithioites [P(III), **42**] was produced ( $\delta = 118$  ppm) in 5 minutes and  $\text{P}_4$  disappeared completely. In the meantime, there are two obvious peaks ( $\delta = 75$  and 63 ppm) that appeared. The signals at  $\delta = 75$  and  $\delta = 63$  ppm belong to salt **43** and phosphorotrithioate [P(V), **44**], respectively. Furthermore, two new weak peaks at 173 ppm and 180 ppm emerged. The signals at  $\delta = 173$  and 180 ppm may belong to  $(\text{C}_2\text{H}_5\text{S})_4\text{P}^+\text{SC}_2\text{H}_5^-$  and  $(\text{C}_2\text{H}_5\text{S})_4\text{P}^+\text{OH}^-$  species.

**Fig. 3, Fig. 4, and Fig. 5** As time progressed, the  $^{31}\text{P}$  NMR signals of **42** and **44** disappeared gradually and the signal of salt **43** ( $\delta = 75$  ppm) increased. The reaction was almost complete after 45 min according to the  $^{31}\text{P}$  NMR spectra.

**Fig. 6, Fig. 7, and Fig. 8** The reaction was conducted under standard conditions for 10 min. The reaction mixture was monitored by HRMS (FT-ICR-MS) and an electrospray ionization source in positive-ion mode.

P<sub>4</sub>-Toluene:

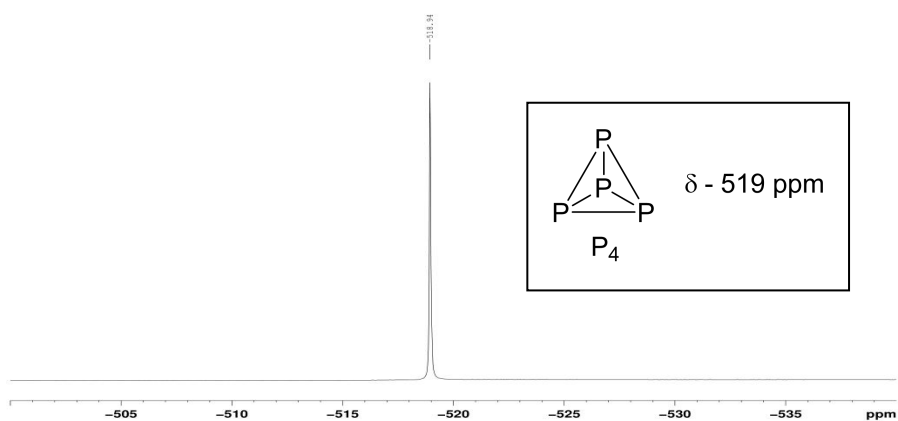

Fig. 1

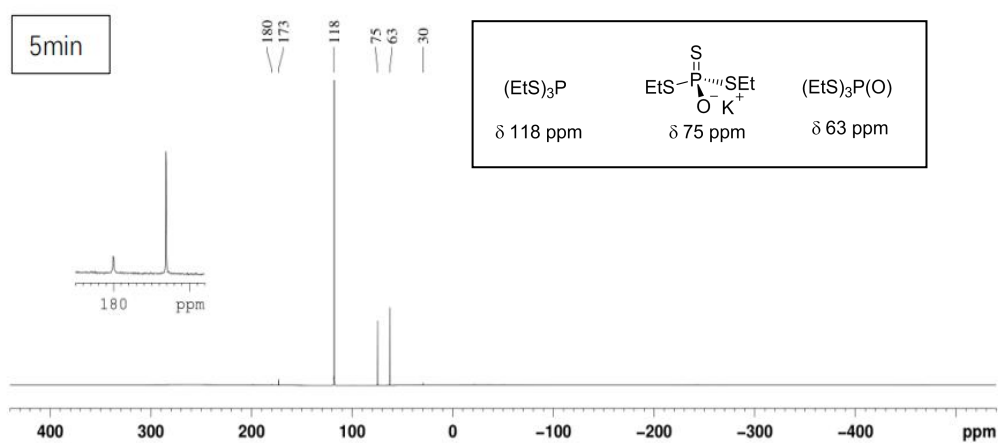

Fig. 2

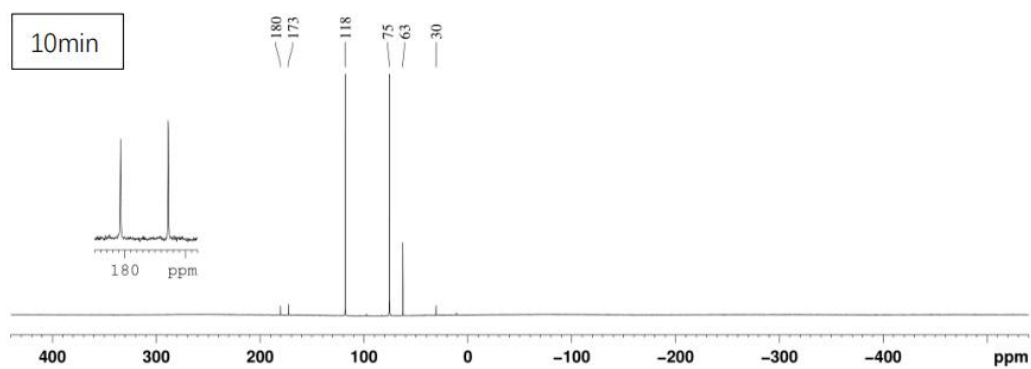

Fig. 3

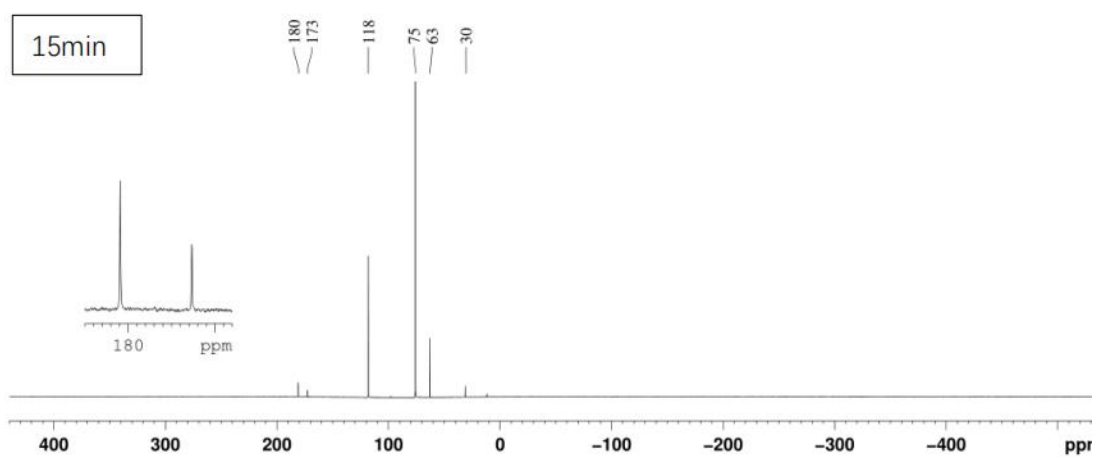

Fig. 4

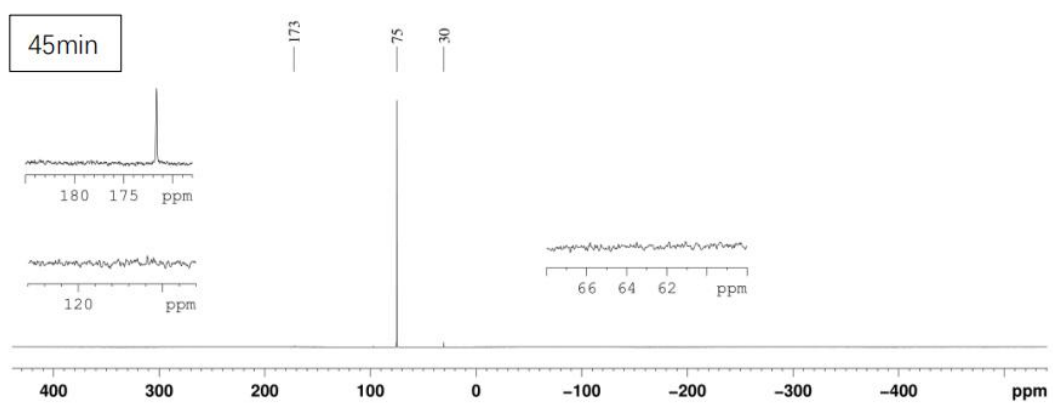

Fig. 5

## Reaction mechanism

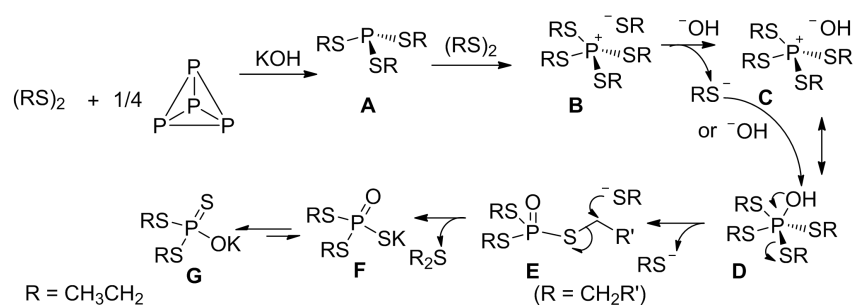

### Intermediate A (Compound 42) in reaction mechanism

HRMS calcd for  $C_6H_{16}PS_3[M+H]^+$  215.0146, found 215.0146.

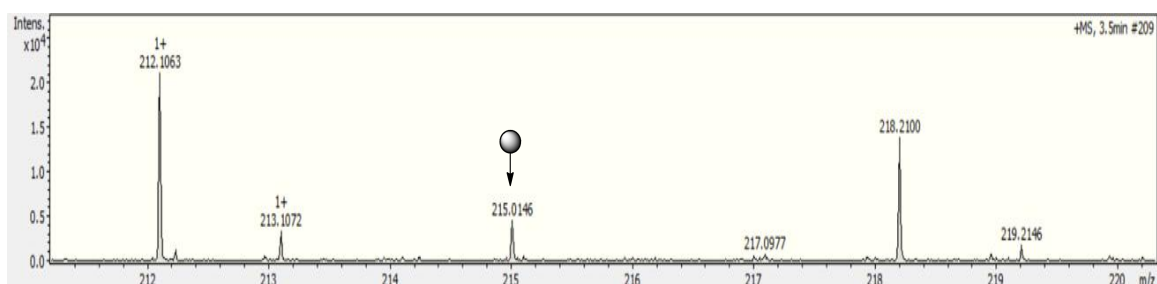

Fig. 6

### Intermediate B or C in reaction mechanism

HRMS calcd for  $C_8H_{20}PS_4^+ [M]^+$  275.0180, found 275.0180.

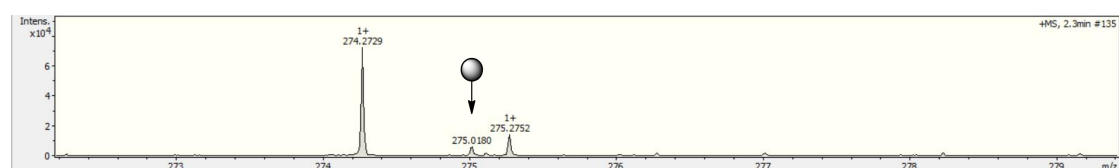

Fig. 7

### Intermediate E (Compound 44) in reaction mechanism

HRMS calcd for  $C_6H_{16}POS_3[M+H]^+$  231.0095, found 231.0091,  $C_6H_{15}POS_3Na[M+Na]^+$  252.9915, found 252.9908.

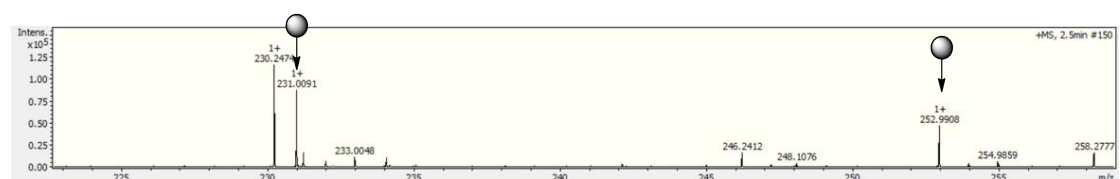

Fig. 8

### Intermediate F or G (Compound 3) in reaction mechanism

Phosphorotrithioic acid, *S,S*-dibutyl ester, potassium salt (**3**, CAS no. 1217597-47-1)

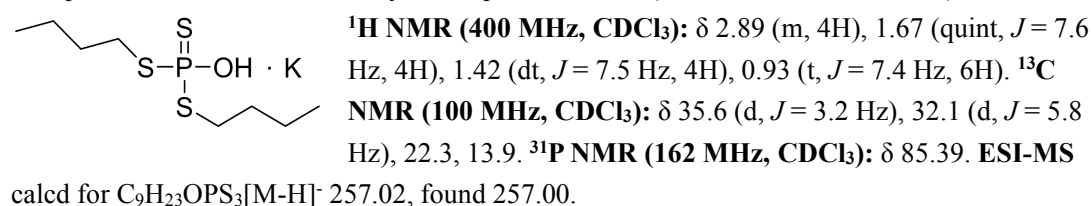

### Spectral data

*S,S*-dibutyl *S*,*S*-dibutyl phosphorotrithioate(4, CAS no.31173-07-6)

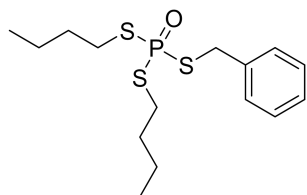

Colorless oil. Yield: 95% (From RCl); Yield: 95% (From RBr).

**<sup>1</sup>H NMR (400 MHz, CDCl<sub>3</sub>):** δ 7.37 (d, *J* = 7.5 Hz, 2H), 7.32 (t, *J* = 7.6 Hz, 2H), 7.27 (t, *J* = 7.2 Hz, 1H), 4.19 (d, *J* = 12.4 Hz, 2H), 2.97 (quint, *J* = 7.2 Hz, 4H), 1.72 (quint, *J* = 7.4 Hz, 4H), 1.43 (dt, *J* = 7.4 Hz, 4H), 0.93 (t, *J* = 7.4 Hz, 6H). **<sup>13</sup>C NMR (100 MHz, CDCl<sub>3</sub>):** δ

136.6 (d, *J* = 6.6 Hz), 129.4, 128.9, 127.9, 37.0 (d, *J* = 3.2 Hz), 32.8 (d, *J* = 4.4 Hz), 32.7 (d, *J* = 5.4 Hz), 21.9, 13.7. **<sup>31</sup>P NMR (162 MHz, CDCl<sub>3</sub>):** δ 63.73. **HRMS** calcd for C<sub>15</sub>H<sub>25</sub>OPS<sub>3</sub>Na [M+Na]<sup>+</sup> 371.0697, found 371.0703.

*S,S*-dibutyl *S*-(2-methylbenzyl) phosphorotrithioate (5, New Compound.)

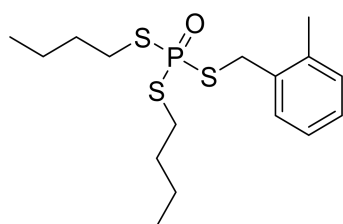

Colorless oil. Yield: 93%.

**<sup>1</sup>H NMR (400 MHz, CDCl<sub>3</sub>):** δ 7.32 (d, *J* = 7.4 Hz, 1H), 7.20-7.14 (m, 3H), 4.22 (d, *J* = 10.1 Hz, 2H), 2.99 (quint, *J* = 7.5 Hz, 4H), 2.41 (s, 3H), 1.73 (quint, *J* = 7.4 Hz, 4H), 1.43 (dt, *J* = 7.5 Hz, 4H), 0.93 (t, *J* = 7.4 Hz, 6H). **<sup>13</sup>C NMR (100 MHz, CDCl<sub>3</sub>):** δ 137.2, 134.2 (d, *J* = 7.5 Hz), 130.8, 130.5, 128.3,

126.5, 35.3 (d, *J* = 4.2 Hz), 32.8 (d, *J* = 4.3 Hz), 32.7 (d, *J* = 4.4 Hz), 21.9, 19.4, 13.7. **<sup>31</sup>P NMR (162 MHz, CDCl<sub>3</sub>):** δ 63.53. **HRMS** calcd for C<sub>16</sub>H<sub>28</sub>OPS<sub>3</sub> [M+H]<sup>+</sup> 363.1034, found 363.1033.

*S,S*-dibutyl *S*-(3-methylbenzyl) phosphorotrithioate (6, New Compound.)

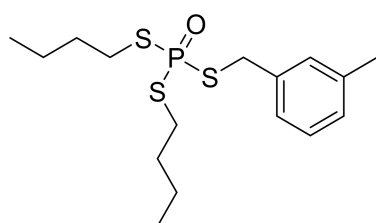

Colorless oil. Yield: 93%.

**<sup>1</sup>H NMR (400 MHz, CDCl<sub>3</sub>):** δ 7.22-7.16 (m, 3H), 7.08 (d, *J* = 7.5 Hz, 1H), 4.16 (d, *J* = 11.9 Hz, 2H), 2.98 (quint, *J* = 7.4 Hz, 4H), 2.34 (s, 3H), 1.72 (quint, *J* = 7.6 Hz, 4H), 1.43 (dt, *J* = 7.5 Hz, 4H), 0.93 (t, *J* = 7.3 Hz, 6H). **<sup>13</sup>C NMR (100 MHz, CDCl<sub>3</sub>):** δ 138.6, 136.3 (d, *J* = 6.6 Hz), 130.1, 128.8, 128.6,

126.4, 36.9 (d, *J* = 4.2 Hz), 32.8 (d, *J* = 4.5 Hz), 32.6 (d, *J* = 4.8 Hz), 21.9, 21.5, 13.6. **<sup>31</sup>P NMR (162 MHz, CDCl<sub>3</sub>):** δ 63.06. **HRMS** calcd for C<sub>16</sub>H<sub>27</sub>OPS<sub>3</sub>Na [M+Na]<sup>+</sup> 385.0854, found 385.0854.

*S,S*-dibutyl *S*-(4-methylbenzyl) phosphorotrithioate (7, New Compound.)

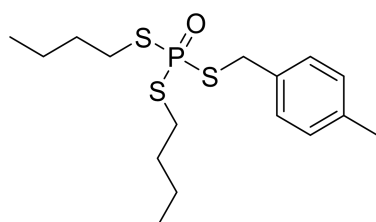

Yellow oil. Yield: 92%.

**<sup>1</sup>H NMR (400 MHz, CDCl<sub>3</sub>):** δ 7.26 (d, *J* = 8.2 Hz, 2H), 7.13 (d, *J* = 7.7 Hz, 2H), 4.16 (d, *J* = 12.1 Hz, 2H), 2.97 (quint, *J* = 7.3 Hz, 4H), 2.33 (s, 3H), 1.72 (quint, *J* = 7.8 Hz, 4H), 1.42 (dt, *J* = 7.4 Hz, 4H), 0.93 (t, *J* = 7.5 Hz, 6H). **<sup>13</sup>C NMR (100 MHz, CDCl<sub>3</sub>):** δ 137.7, 133.4 (d, *J* = 6.5 Hz), 129.6, 129.3, 36.8 (d,

*J* = 3.9 Hz), 32.8 (d, *J* = 5.6 Hz), 32.6 (d, *J* = 4.8 Hz), 21.9, 21.3, 13.7. **<sup>31</sup>P NMR (162 MHz, CDCl<sub>3</sub>):** δ 63.88. **HRMS** calcd for C<sub>16</sub>H<sub>27</sub>OPS<sub>3</sub>Na [M+Na]<sup>+</sup> 385.0854, found 385.0864.

*S,S*-dibutyl *S*-(4-(tert-butyl)benzyl) phosphorotrithioate (**8**, New Compound.)

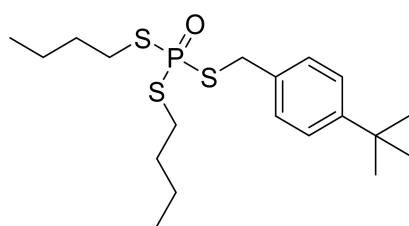

Colorless oil. Yield: 93%.

**<sup>1</sup>H NMR (400 MHz, CDCl<sub>3</sub>):** δ 7.34 (d, *J* = 8.1 Hz, 2H), 7.30 (d, *J* = 8.2 Hz, 2H), 4.18 (d, *J* = 12.1 Hz, 2H), 2.98 (quint, *J* = 7.5 Hz, 4H), 1.72 (quint, *J* = 7.5 Hz, 4H), 1.43 (dt, *J* = 7.4 Hz, 4H), 1.30 (s, 9H), 0.93 (t, *J* = 7.8 Hz, 6H).

**<sup>13</sup>C NMR (100 MHz, CDCl<sub>3</sub>):** δ 150.9, 133.3 (d, *J* = 6.5 Hz), 129.1, 125.8, 36.7 (d, *J* = 3.9 Hz), 34.7, 32.8 (d, *J* = 5.5 Hz), 32.6 (d, *J* = 4.8 Hz), 31.5, 21.9, 13.7. **<sup>31</sup>P NMR (162 MHz, CDCl<sub>3</sub>):** δ 63.93. **HRMS** calcd for C<sub>19</sub>H<sub>33</sub>OPS<sub>3</sub>Na [M+Na]<sup>+</sup> 427.1323, found 427.1323.

*S,S*-dibutyl *S*-(4-vinylbenzyl) phosphorotrithioate (**9**, New Compound.)

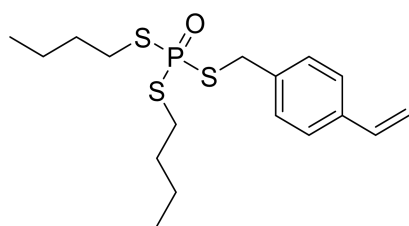

Colorless oil. Yield: 95%.

**<sup>1</sup>H NMR (400 MHz, CDCl<sub>3</sub>):** δ 7.36 (d, *J* = 8.1 Hz, 2H), 7.30 (d, *J* = 8.2 Hz, 2H), 6.69 (dd, *J* = 17.6 Hz, *J* = 10.9 Hz, 1H), 5.74 (d, *J* = 17.6 Hz, 1H), 5.24 (d, *J* = 11.0 Hz, 1H), 4.18 (d, *J* = 12.6 Hz, 2H), 2.97 (quint, *J* = 7.3 Hz, 4H), 1.71 (quint, *J* = 7.8 Hz, 4H), 1.42 (dt, *J* = 7.3 Hz, 4H), 0.92 (t, *J* = 7.8 Hz, 6H).

**<sup>13</sup>C NMR (100 MHz, CDCl<sub>3</sub>):** δ 137.2, 136.4, 136.0 (d, *J* = 5.5 Hz), 129.6, 126.7, 114.3, 36.8 (d, *J* = 4.0 Hz), 32.8 (d, *J* = 3.4 Hz), 32.6 (d, *J* = 5.4 Hz), 21.9, 13.6. **<sup>31</sup>P NMR (162 MHz, CDCl<sub>3</sub>):** δ 63.79. **HRMS** calcd for C<sub>17</sub>H<sub>27</sub>OPS<sub>3</sub>Na [M+Na]<sup>+</sup> 397.0854, found 397.0855.

*S,S*-dibutyl *S*-(4-formylbenzyl) phosphorotrithioate (**10**, New Compound.)

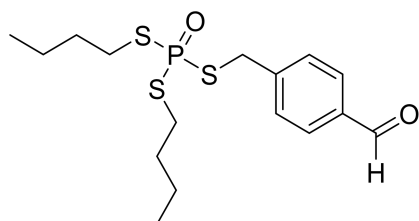

Colorless oil. Yield: 95%.

**<sup>1</sup>H NMR (400 MHz, CDCl<sub>3</sub>):** δ 10.00 (s, 1H), 7.85 (d, *J* = 8.1 Hz, 2H), 7.57 (d, *J* = 8.1 Hz, 2H), 4.24 (d, *J* = 13.9 Hz, 2H), 2.97 (quint, *J* = 7.5 Hz, 4H), 1.71 (quint, *J* = 7.4 Hz, 4H), 1.42 (dt, *J* = 7.6 Hz, 4H), 0.92 (t, *J* = 7.3 Hz, 6H).

**<sup>13</sup>C NMR (100 MHz, CDCl<sub>3</sub>):** δ 191.8, 143.9 (d, *J* = 5.5 Hz), 135.83, 130.2, 130.1, 36.5 (d, *J* = 3.9 Hz), 32.9 (d, *J* = 4.4 Hz), 32.6 (d, *J* = 4.4 Hz), 21.9, 13.6. **<sup>31</sup>P NMR (162 MHz, CDCl<sub>3</sub>):** δ 63.40. **HRMS** calcd for C<sub>16</sub>H<sub>26</sub>O<sub>2</sub>PS<sub>3</sub> [M+H]<sup>+</sup> 377.0827, found 377.0826.

*S,S*-dibutyl *S*-(4-cyanobenzyl) phosphorotrithioate (**11**, New Compound.)

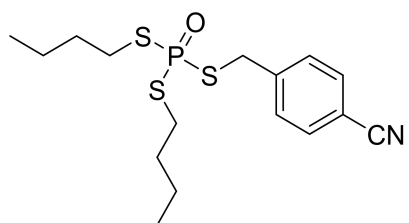

Light yellow oil. Yield: 86%.

**<sup>1</sup>H NMR (400 MHz, CDCl<sub>3</sub>):** δ 7.62 (d, *J* = 8.3 Hz, 2H), 7.51 (d, *J* = 8.1 Hz, 2H), 4.21 (d, *J* = 14.3 Hz, 2H), 2.96 (quint, *J* = 7.7 Hz, 4H), 1.71 (quint, *J* = 7.5 Hz, 4H), 1.42 (dt, *J* = 7.5 Hz, 4H), 0.93 (t, *J* = 7.6 Hz, 6H).

**<sup>13</sup>C NMR (100 MHz, CDCl<sub>3</sub>):** δ 142.6 (d, *J* = 4.5 Hz), 132.6, 130.2, 118.7, 111.7, 36.3 (d, *J* = 3.3 Hz), 32.9 (d, *J* = 4.2 Hz), 32.6 (d, *J* = 5.2 Hz), 21.9, 13.6. **<sup>31</sup>P NMR (162 MHz, CDCl<sub>3</sub>):** δ 63.19. **HRMS** calcd for C<sub>16</sub>H<sub>24</sub>NOPS<sub>3</sub>Na [M+Na]<sup>+</sup> 396.0650, found 396.0644.

*S,S*-dibutyl *S*-(4-nitrobenzyl) phosphorotrithioate(**12**, New Compound.)

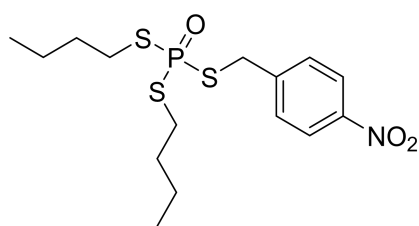

Yellow oil. Yield: 94%.

**<sup>1</sup>H NMR (400 MHz, CDCl<sub>3</sub>):** δ 8.19 (d, *J* = 8.5 Hz, 2H), 7.58 (d, *J* = 8.7 Hz, 2H), 4.25 (d, *J* = 14.5 Hz, 2H), 2.97 (quint, *J* = 7.6 Hz, 4H), 1.71 (quint, *J* = 7.4 Hz, 4H), 1.42 (dt, *J* = 7.3 Hz, 4H), 0.93 (t, *J* = 7.4 Hz, 6H). **<sup>13</sup>C NMR**

**(100 MHz, CDCl<sub>3</sub>):** δ 147.5, 144.7 (d, *J* = 4.4 Hz), 130.3, 124.0, 35.9 (d, *J* = 3.3 Hz), 33.0 (d, *J* = 4.2 Hz), 32.6 (d, *J* = 5.2 Hz), 21.9, 13.6. **<sup>31</sup>P NMR (162 MHz, CDCl<sub>3</sub>):** δ 63.14. **HRMS** calcd for C<sub>15</sub>H<sub>24</sub>NO<sub>3</sub>PS<sub>3</sub>Na [M+Na]<sup>+</sup> 416.0548, found 416.0556.

*S,S*-dibutyl *S*-(4-fluorobenzyl) phosphorotrithioate(**13**, New Compound.)

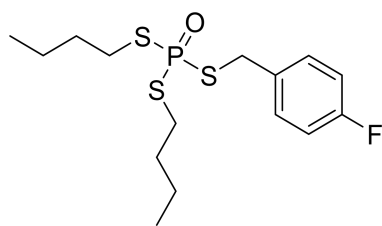

Light yellow oil. Yield: 92%.

**<sup>1</sup>H NMR (400 MHz, CDCl<sub>3</sub>):** δ 7.35 (dd, *J* = 7.3 Hz, *J* = 5.4 Hz, 2H), 7.00 (d, *J* = 8.7 Hz, 2H), 4.17 (d, *J* = 13.3 Hz, 2H), 2.97 (quint, *J* = 7.5 Hz, 4H), 1.71 (quint, *J* = 7.6 Hz, 4H), 1.42 (dt, *J* = 7.2 Hz, 4H), 0.93 (t, *J* = 7.4 Hz, 6H). **<sup>13</sup>C NMR (100**

**MHz, CDCl<sub>3</sub>):** δ 162.4 (d, *J* = 247.1 Hz), 132.5 (dd, *J* = 6.6 Hz, *J* = 3.3 Hz), 131.1 (d, *J* = 8.1 Hz), 115.8 (d, *J* = 21.2 Hz), 36.2 (d, *J* = 3.4 Hz), 32.9 (d, *J* = 4.4 Hz), 32.7 (d, *J* = 5.6 Hz), 21.9, 13.7. **<sup>31</sup>P NMR (162 MHz, CDCl<sub>3</sub>):** δ 63.37. **<sup>19</sup>F NMR (377 MHz, CDCl<sub>3</sub>):** δ (ppm) -114.28. **HRMS** calcd for C<sub>15</sub>H<sub>25</sub>FOPS<sub>3</sub> [M+H]<sup>+</sup> 367.0784, found 367.0784.

*S,S*-dibutyl *S*-(4-chlorobenzyl) phosphorotrithioate(**14**, CAS no.33574-46-8)

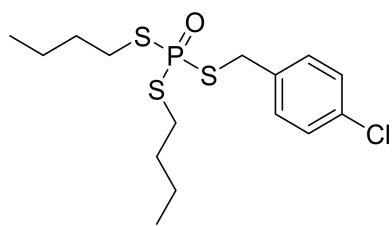

Light yellow oil. Yield: 93%.

**<sup>1</sup>H NMR (400 MHz, CDCl<sub>3</sub>):** δ 7.33-7.27 (m, 4H), 4.15 (d, *J* = 13.2 Hz, 2H), 2.97 (quint, *J* = 7.5 Hz, 4H), 1.71 (quint, *J* = 7.2 Hz, 4H), 1.42 (dt, *J* = 7.4 Hz, 4H), 0.93 (t, *J* = 7.1 Hz, 6H). **<sup>13</sup>C NMR (100 MHz, CDCl<sub>3</sub>):** δ 135.3 (d, *J* = 6.2 Hz), 133.8, 130.8, 129.0, 36.2 (d, *J* = 3.3 Hz), 32.9 (d, *J* = 3.4 Hz),

32.6 (d, *J* = 5.5 Hz), 21.9, 13.7. **<sup>31</sup>P NMR (162 MHz, CDCl<sub>3</sub>):** δ 63.52. **HRMS** calcd for C<sub>15</sub>H<sub>25</sub>ClOPS<sub>3</sub> [M+H]<sup>+</sup> 383.0488, found 383.0488.

*S*-(4-bromobenzyl) *S,S*-dibutyl phosphorotrithioate(**15**, New Compound.)

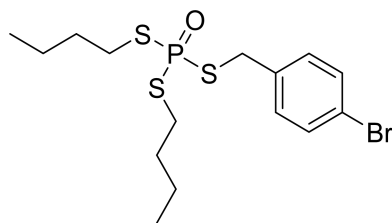

Light yellow oil. Yield: 89%.

**<sup>1</sup>H NMR (400 MHz, CDCl<sub>3</sub>):** δ 7.46-7.43 (m, 2H), 7.27-7.25 (m, 2H), 4.13 (d, *J* = 13.5 Hz, 2H), 2.96 (quint, *J* = 7.4 Hz, 4H), 1.74-1.68 (m, 4H), 1.42 (dt, *J* = 7.5 Hz, 4H), 0.93 (t, *J* = 7.4 Hz, 6H). **<sup>13</sup>C NMR (100 MHz, CDCl<sub>3</sub>):** δ

135.9 (d, *J* = 5.6 Hz), 132.0, 131.1, 121.9, 36.3 (d, *J* = 3.2 Hz), 32.9 (d, *J* = 3.3 Hz), 32.6 (d, *J* = 5.6 Hz), 21.9, 13.7. **<sup>31</sup>P NMR (162 MHz, CDCl<sub>3</sub>):** δ 63.49. **HRMS** calcd for C<sub>15</sub>H<sub>25</sub>BrOPS<sub>3</sub> [M+H]<sup>+</sup> 426.9983, found 426.9988.



*S,S*-dibutyl *S*-(naphthalen-2-ylmethyl) phosphorotrithioate (**16**, New Compound.)

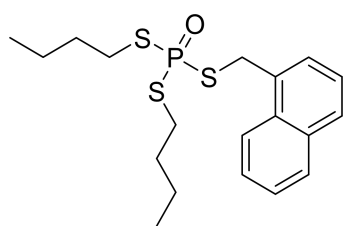

Light yellow oil. Yield: 95%.

**<sup>1</sup>H NMR (400 MHz, CDCl<sub>3</sub>):** δ 8.12 (d, *J* = 8.5 Hz, 1H), 7.85 (d, *J* = 8.0 Hz, 1H), 7.78 (d, *J* = 8.3 Hz, 1H), 7.57-7.53 (m, 2H), 7.51-7.48 (m, 1H), 7.39 (t, *J* = 7.7 Hz, 1H), 4.66 (d, *J* = 10.3 Hz, 2H), 2.98 (quint, *J* = 7.5 Hz, 4H), 1.71 (quint, *J* = 7.6 Hz, 4H), 1.40 (dt, *J* = 7.6 Hz, 4H), 0.90 (t, *J* = 7.4 Hz, 6H). **<sup>13</sup>C NMR (100 MHz, CDCl<sub>3</sub>):** δ 134.0, 131.9 (d, *J* = 6.9 Hz), 131.4, 129.1, 129.0, 128.3, 126.7, 126.1, 125.5, 123.8, 34.9 (d, *J* = 3.3 Hz), 32.8 (d, *J* = 3.5 Hz), 32.6 (d, *J* = 5.6 Hz), 21.9, 13.6. **<sup>31</sup>P NMR (162 MHz, CDCl<sub>3</sub>):** δ 63.76. **HRMS** calcd for C<sub>19</sub>H<sub>27</sub>OPS<sub>3</sub>Na [M+Na]<sup>+</sup> 421.0854, found 421.0853.

*S,S*-dibutyl *S*-(pyridin-2-ylmethyl) phosphorotrithioate(**17**, New Compound.)

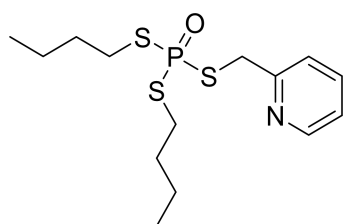

Light yellow oil. Yield: 80%.

**<sup>1</sup>H NMR (400 MHz, CDCl<sub>3</sub>):** δ 8.56 (d, *J* = 5.0 Hz, 1H), 7.68-7.65 (td, *J* = 7.7 Hz, *J* = 1.7 Hz, 1H), 7.45 (d, *J* = 7.8 Hz, 1H), 7.21-7.19 (ddd, *J* = 7.8 Hz, *J* = 5.1 Hz, *J* = 1.1 Hz, 1H), 4.31 (d, *J* = 13.9 Hz, 2H), 2.98 (quint\*d, *J* = 7.3 Hz, *J* = 1.2 Hz, 4H), 1.71 (quint, *J* = 7.5 Hz, 4H), 1.42 (dt, *J* = 7.5 Hz, 4H), 0.92 (t, *J* = 7.4 Hz, 6H). **<sup>13</sup>C NMR (100 MHz, CDCl<sub>3</sub>):** δ 156.5 (d, *J* = 5.5 Hz), 149.7, 136.9, 123.8, 122.6, 38.4 (d, *J* = 3.3 Hz), 32.8 (d, *J* = 4.4 Hz), 32.6 (d, *J* = 5.5 Hz), 21.9, 13.6. **<sup>31</sup>P NMR (162 MHz, CDCl<sub>3</sub>):** δ 64.51. **HRMS** calcd for C<sub>14</sub>H<sub>25</sub>NOPS<sub>3</sub> [M+H]<sup>+</sup> 350.0830, found 350.0839.

*S,S*-dibutyl *S*-(2-methylallyl) phosphorotrithioate(**18**, New Compound.)

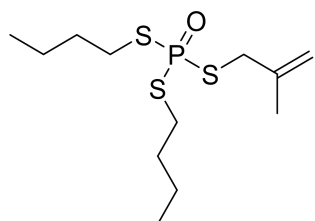

Colorless oil. Yield: 90%.

**<sup>1</sup>H NMR (400 MHz, CDCl<sub>3</sub>):** δ 5.05 (s, 1H), 4.92 (s, 1H), 3.61 (d, *J* = 12.8 Hz, 2H), 2.99 (quint, *J* = 7.3 Hz, 4H), 1.86 (s, 3H), 1.74 (quint, *J* = 7.5 Hz, 4H), 1.44 (dt, *J* = 7.4 Hz, 4H), 0.94 (t, *J* = 7.4 Hz, 6H). **<sup>13</sup>C NMR (100 MHz, CDCl<sub>3</sub>):** δ 140.1 (d, *J* = 5.5 Hz), 115.6, 39.9 (d, *J* = 3.6 Hz), 32.8 (d, *J* = 4.4 Hz), 32.6 (d, *J* = 4.4 Hz), 21.9, 21.3, 13.6. **<sup>31</sup>P NMR (162 MHz, CDCl<sub>3</sub>):** δ 64.34. **HRMS** calcd for C<sub>13</sub>H<sub>25</sub>OPS<sub>3</sub>Na [M+Na]<sup>+</sup> 335.0697, found 335.0694.

*S,S*-dibutyl *S*-(cyclopropylmethyl) phosphorotrithioate(**19**, New Compound.)

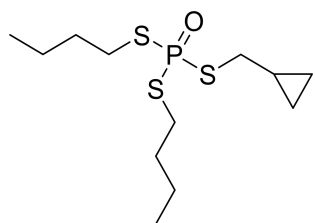

Light yellow oil. Yield: 90%.

**<sup>1</sup>H NMR (400 MHz, CDCl<sub>3</sub>):** δ 2.99 (quint, *J* = 7.3 Hz, 4H), 2.93 (dd, *J* = 13.5 Hz, *J* = 7.4 Hz, 2H), 1.74 (quint, *J* = 7.5 Hz, 4H), 1.44 (dt, *J* = 7.5 Hz, 4H), 1.19-1.12 (m, 1H), 0.94 (t, *J* = 7.4 Hz, 6H), 0.66-0.63 (m, 2H), 0.33 (dd, *J* = 12.1 Hz, *J* = 4.8 Hz, 2H). **<sup>13</sup>C NMR (100 MHz, CDCl<sub>3</sub>):** δ 139.5, 128.8, 128.7, 126.9, 37.0 (d, *J* = 4.4 Hz), 34.1 (d, *J* = 3.5 Hz), 32.9 (d, *J* = 4.3 Hz), 32.6 (d, *J* = 5.5 Hz), 21.9, 13.7. **<sup>31</sup>P NMR (162 MHz, CDCl<sub>3</sub>):** δ 64.31. **HRMS** calcd for C<sub>12</sub>H<sub>25</sub>OPS<sub>3</sub>Na [M+Na]<sup>+</sup> 335.0697, found 335.0697.

*S,S*-dibutyl *S*-phenethyl phosphorotrithioate (**20**, New Compound.)

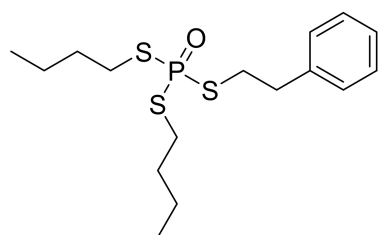

Light yellow oil. Yield: 95%.

**<sup>1</sup>H NMR (400 MHz, CDCl<sub>3</sub>):** δ 7.31 (*J* = 8.2 Hz, 1H), 7.30 (*J* = 7.1 Hz, 1H), 7.24-7.22 (m, 3H), 3.22 (quint, *J* = 7.4 Hz, 2H), 3.06 (t, *J* = 7.5 Hz, 2H), 2.97 (quint, *J* = 7.3 Hz, 4H), 1.72 (quint, *J* = 7.4 Hz, 4H), 1.43 (dt, *J* = 7.5 Hz, 4H), 0.93 (t, *J* = 7.4 Hz, 6H). **<sup>13</sup>C NMR (100 MHz, CDCl<sub>3</sub>):** δ 139.5, 128.8, 128.7, 126.9, 37.0 (d, *J* = 4.4 Hz), 34.1 (d, *J* = 3.5 Hz), 32.9 (d, *J* = 4.3 Hz), 32.6 (d, *J* = 5.5 Hz), 21.9, 13.7. **<sup>31</sup>P NMR (162 MHz, CDCl<sub>3</sub>):** δ 64.81. **HRMS** calcd for C<sub>16</sub>H<sub>27</sub>OPS<sub>3</sub>Na [M+Na]<sup>+</sup> 385.0854, found 385.0855.

*S,S*-dibutyl *S*-(pent-4-yn-1-yl) phosphorotrithioate (**21**, New Compound.)

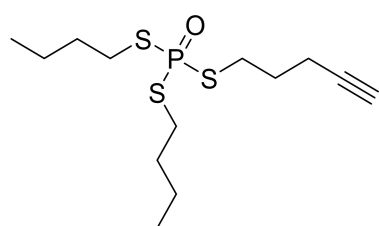

Light yellow oil. Yield: 93%.

**<sup>1</sup>H NMR (400 MHz, CDCl<sub>3</sub>):** δ 3.13-3.08 (m, 2H), 2.99 (quint, *J* = 7.3 Hz, 4H), 2.37-2.34 (m, 2H), 2.02-1.97 (m, 3H), 1.74 (quint, *J* = 7.3 Hz, 4H), 1.44 (dt, *J* = 7.5 Hz, 4H), 0.94 (t, *J* = 7.4 Hz, 6H). **<sup>13</sup>C NMR (100 MHz, CDCl<sub>3</sub>):** δ 82.7, 69.6, 32.8 (d, *J* = 4.4 Hz), 32.6 (d, *J* = 5.0 Hz), 31.8 (d, *J* = 3.3 Hz), 29.3 (d, *J* = 3.4 Hz), 21.9, 17.5, 13.6. **<sup>31</sup>P NMR (162 MHz, CDCl<sub>3</sub>):** δ 64.38. **HRMS** calcd for C<sub>13</sub>H<sub>25</sub>OPS<sub>3</sub>Na [M+Na]<sup>+</sup> 347.0697, found 347.0704.

*S,S*-dibutyl *S*-octyl phosphorotrithioate (**22**, New Compound.)

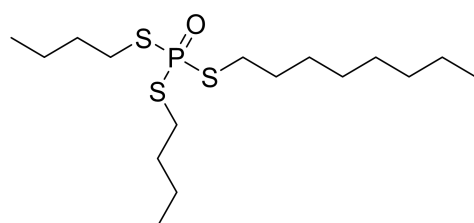

Colorless oil. Yield: 95%.

**<sup>1</sup>H NMR (400 MHz, CDCl<sub>3</sub>):** δ 3.01-2.95 (m, 6H), 1.77-1.71 (m, 6H), 1.47-1.38 (m, 6H), 1.30-1.27 (m, 8H), 0.94 (t, *J* = 7.3 Hz, 6H), 0.88 (t, *J* = 7.1 Hz, 3H). **<sup>13</sup>C NMR (100 MHz, CDCl<sub>3</sub>):** δ 33.1 (d, *J* = 3.4 Hz), 32.8 (d, *J* = 3.3 Hz), 32.6 (d, *J* = 4.5 Hz), 31.9, 30.6 (d, *J* = 4.8 Hz), 29.2, 29.1, 28.8, 22.8, 21.9, 14.2, 13.6. **<sup>31</sup>P NMR (162 MHz, CDCl<sub>3</sub>):** δ 64.81. **HRMS** calcd for C<sub>16</sub>H<sub>35</sub>OPS<sub>3</sub>Na [M+Na]<sup>+</sup> 393.1480, found 393.1480.

tert-butyl 3-((bis(butylthio)phosphoryl)thio)propylcarbamate (**23**, New Compound.)

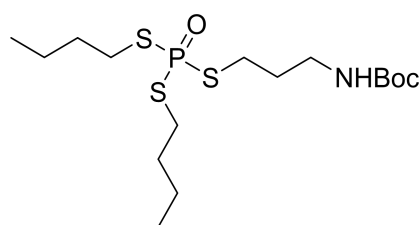

Colorless oil. Yield: 90%.

**<sup>1</sup>H NMR (400 MHz, CDCl<sub>3</sub>):** δ 5.04 (s, NH), 3.27 (d, *J* = 6.0 Hz, 2H), 3.05-2.96 (m, 6H), 1.93 (quint, *J* = 6.7 Hz, 2H), 1.73 (quint, *J* = 7.5 Hz, 4H), 1.48-1.41 (m, 13H), 0.94 (t, *J* = 7.3 Hz, 6H). **<sup>13</sup>C NMR (100 MHz, CDCl<sub>3</sub>):** δ 156.1, 38.7, 32.9 (d, *J* = 3.8 Hz), 32.6 (d, *J* = 5.4 Hz), 30.9, 30.1 (d, *J* = 3.3 Hz), 28.5, 21.9, 13.6. **<sup>31</sup>P NMR (162 MHz, CDCl<sub>3</sub>):** δ 65.20. **HRMS** calcd for C<sub>16</sub>H<sub>34</sub>NO<sub>3</sub>PS<sub>3</sub>Na [M+Na]<sup>+</sup> 438.1331, found 438.1326.

*S,S*-dibutyl *S*-(2-cyanoethyl) phosphorotrithioate(**24**, New Compound.)

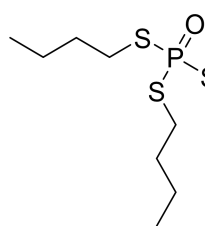

Yellow oil. Yield: 76%.

**<sup>1</sup>H NMR (400 MHz, CDCl<sub>3</sub>):** δ 3.23-3.17 (m, 2H), 3.00 (quint, *J* = 7.5 Hz, 4H), 2.92 (t, *J* = 7.3 Hz, 2H), 1.74 (quint, *J* = 7.6 Hz, 4H), 1.45 (dt, *J* = 7.4 Hz, 4H), 0.95 (t, *J* = 7.4 Hz, 6H). **<sup>13</sup>C NMR (100 MHz, CDCl<sub>3</sub>):** δ 117.7, 33.1 (d, *J* = 4.3 Hz), 32.6 (d, *J* = 5.5 Hz), 28.2 (d, *J* = 3.4 Hz), 21.9, 20.0 (d, *J* = 2.1 Hz), 13.6. **<sup>31</sup>P**

**NMR (162 MHz, CDCl<sub>3</sub>):** δ 63.64. **HRMS** calcd for C<sub>11</sub>H<sub>22</sub>NOPS<sub>3</sub>Na [M+Na]<sup>+</sup> 334.0502, found 334.0493.

*S*-(2-(1,3-dioxolan-2-yl)ethyl) *S,S*-dibutyl phosphorotrithioate(**25**, New Compound.)

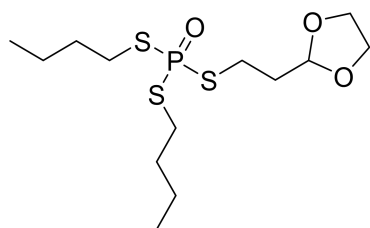

Colorless oil. Yield: 83%.

**<sup>1</sup>H NMR (400 MHz, CDCl<sub>3</sub>):** δ 4.98 (t, *J* = 4.4 Hz, 1H), 3.98 (t, *J* = 7.2 Hz, 2H), 3.87 (t, *J* = 7.2 Hz, 2H), 3.08 (quint, *J* = 7.6 Hz, 2H), 2.99 (quint, *J* = 7.5 Hz, 4H), 2.15-2.12 (m, 2H), 1.73 (quint, *J* = 7.5 Hz, 4H), 1.44 (dt, *J* = 7.4 Hz, 4H), 0.93 (t, *J* = 7.3 Hz, 6H). **<sup>13</sup>C NMR (100 MHz, CDCl<sub>3</sub>):** δ 102.8, 65.2, 34.8

(d, *J* = 4.4 Hz), 32.8 (d, *J* = 4.4 Hz), 32.6 (d, *J* = 4.9 Hz), 27.3 (d, *J* = 4.4 Hz), 21.9, 13.7. **<sup>31</sup>P** NMR (162 MHz, CDCl<sub>3</sub>): δ 64.42. **HRMS** calcd for C<sub>13</sub>H<sub>27</sub>O<sub>3</sub>PS<sub>3</sub>Na [M+Na]<sup>+</sup> 381.0752, found 381.0751.

*S,S*-dibutyl *S*-(2-cyclopropyl-2-oxoethyl) phosphorotrithioate (**26**, New Compound.)

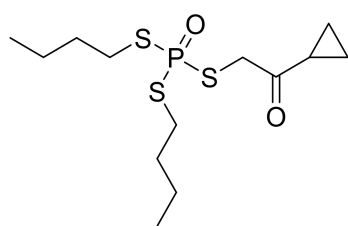

Colorless oil. Yield: 86%.

**<sup>1</sup>H NMR (400 MHz, CDCl<sub>3</sub>):** δ 4.01 (d, *J* = 12.9 Hz, 2H), 3.03-2.98 (m, 4H), 2.16-2.12 (m, 1H), 1.74 (quint, *J* = 7.5 Hz, 4H), 1.44 (dt, *J* = 7.5 Hz, 4H), 1.14 (quint, *J* = 4.0 Hz, 2H), 1.02-0.99 (m, 2H), 0.94 (t, *J* = 7.3 Hz, 6H). **<sup>13</sup>C NMR (100 MHz, CDCl<sub>3</sub>):** δ 203.5 (d, *J* = 5.5 Hz), 42.4 (d, *J* = 3.3 Hz), 32.9 (d, *J* = 4.4 Hz), 32.6 (d, *J* = 4.6 Hz), 21.9, 20.1, 13.6, 12.3. **<sup>31</sup>P** NMR (162 MHz, CDCl<sub>3</sub>): δ 63.49.

**HRMS** calcd for C<sub>13</sub>H<sub>26</sub>O<sub>2</sub>PS<sub>3</sub> [M+H]<sup>+</sup> 341.0827, found 341.0826.

methyl 5-((bis(butylthio)phosphoryl)thio)pentanoate(**27**, New Compound.)

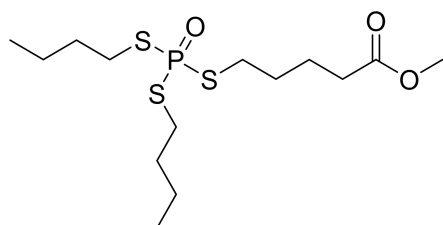

Colorless oil. Yield: 95%.

**<sup>1</sup>H NMR (400 MHz, CDCl<sub>3</sub>):** δ 3.67 (s, 3H), 3.01-2.96 (m, 6H), 2.35 (t, *J* = 6.9 Hz, 2H), 1.82-1.71 (m, 8H), 1.44 (dt, *J* = 7.5 Hz, 4H), 0.94 (t, *J* = 7.3 Hz, 6H). **<sup>13</sup>C**

**NMR (100 MHz, CDCl<sub>3</sub>):** δ 173.6, 51.7, 33.4, 32.8 (d, *J* = 3.4 Hz), 32.6 (d, *J* = 5.4 Hz), 32.5 (d, *J* = 4.3 Hz), 30.0 (d, *J* = 4.4 Hz), 23.9, 21.9, 13.6. **<sup>31</sup>P** NMR (162 MHz, CDCl<sub>3</sub>): δ 64.39. **HRMS** calcd for C<sub>14</sub>H<sub>29</sub>O<sub>3</sub>PS<sub>3</sub>Na [M+Na]<sup>+</sup> 395.0909, found 395.0909.

S-benzyl S,S-dimethyl phosphorotrithioate(**28**, CAS no.32685-59-9)

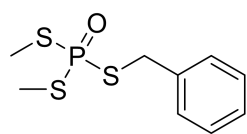

Colorless oil. Yield: 83% (From RCl); Yield: 85% (From RBr).

**<sup>1</sup>H NMR (400 MHz, CDCl<sub>3</sub>):** δ 7.37 (d, *J* = 7.2 Hz, 2H), 7.32 (t, *J* = 7.8 Hz, 2H), 7.27 (t, *J* = 7.1 Hz, 1H), 4.19 (d, *J* = 12.6 Hz, 2H), 2.40 (d, *J* = 16.1 Hz, 6H). **<sup>13</sup>C NMR (100 MHz, CDCl<sub>3</sub>):** δ 136.3 (d, *J* = 6.6 Hz), 129.2, 128.9, 127.9, 36.5 (d, *J* = 3.3 Hz), 14.4 (d, *J* = 4.4 Hz). **<sup>31</sup>P NMR (162 MHz, CDCl<sub>3</sub>):** δ 66.94. **HRMS** calcd for C<sub>9</sub>H<sub>14</sub>OPS<sub>3</sub> [M+H]<sup>+</sup> 264.9939, found 264.9942.

S-benzyl S,S-diethyl phosphorotrithioate(**29**, CAS no.31234-03-4)

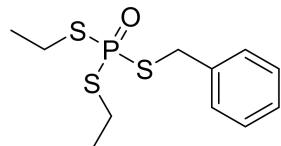

Light yellow oil. Yield: 90%.

**<sup>1</sup>H NMR (400 MHz, CDCl<sub>3</sub>):** δ 7.37 (d, *J* = 7.5 Hz, 2H), 7.32 (t, *J* = 7.8 Hz, 2H), 7.27 (t, *J* = 7.0 Hz, 1H), 4.20 (d, *J* = 12.4 Hz, 2H), 3.00 (dt, *J* = 7.9 Hz, 4H), 1.41 (t, *J* = 7.4 Hz, 6H). **<sup>13</sup>C NMR (100 MHz, CDCl<sub>3</sub>):** δ 136.5 (d, *J* = 5.5 Hz), 129.4, 128.9, 127.9, 37.0 (d, *J* = 3.6 Hz), 27.7 (d, *J* = 4.3 Hz), 16.3 (d, *J* = 5.5 Hz). **<sup>31</sup>P NMR (162 MHz, CDCl<sub>3</sub>):** δ 63.33. **HRMS** calcd for C<sub>11</sub>H<sub>17</sub>OPS<sub>3</sub>Na [M+Na]<sup>+</sup> 315.0071, found 315.0081.

S-benzyl S,S-dipropyl phosphorotrithioate(**30**, New Compound.)

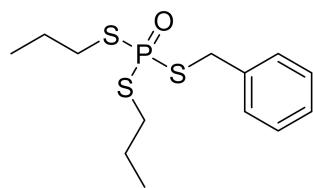

Colorless oil. Yield: 95%.

**<sup>1</sup>H NMR (400 MHz, CDCl<sub>3</sub>):** δ 7.37 (d, *J* = 7.5 Hz, 2H), 7.32 (t, *J* = 7.5 Hz, 2H), 7.27 (t, *J* = 7.2 Hz, 1H), 4.19 (d, *J* = 12.4 Hz, 2H), 2.95 (quint, *J* = 7.6 Hz, 4H), 1.77 (dt, *J* = 7.4 Hz, 4H), 1.01 (t, *J* = 7.4 Hz, 6H). **<sup>13</sup>C NMR (100 MHz, CDCl<sub>3</sub>):** δ 136.5 (d, *J* = 5.7 Hz), 129.4, 128.9, 127.9, 37.0 (d, *J* = 3.5 Hz), 35.0 (d, *J* = 4.4 Hz), 24.1 (d, *J* = 5.4 Hz), 13.4. **<sup>31</sup>P NMR (162 MHz, CDCl<sub>3</sub>):** δ 63.76. **HRMS** calcd for C<sub>13</sub>H<sub>21</sub>OPS<sub>3</sub>Na [M+Na]<sup>+</sup> 343.0384, found 343.0386.

S-benzyl S,S-diisopropyl phosphorotrithioate(**31**, CAS no.31173-04-3)

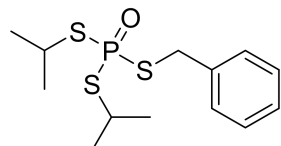

Light yellow oil. Yield: 95%.

**<sup>1</sup>H NMR (400 MHz, CDCl<sub>3</sub>):** δ 7.37 (d, *J* = 7.2 Hz, 2H), 7.32 (t, *J* = 7.5 Hz, 2H), 7.27 (t, *J* = 7.5 Hz, 1H), 4.19 (d, *J* = 12.0 Hz, 2H), 3.68-3.59 (m, 2H), 1.46 (dd, *J* = 9.2 Hz, *J* = 7.3 Hz, 12H). **<sup>13</sup>C NMR (100 MHz, CDCl<sub>3</sub>):** δ 136.5 (d, *J* = 6.6 Hz), 129.4, 128.9, 127.9, 40.6 (d, *J* = 3.7 Hz), 37.3 (d, *J* = 4.4 Hz), 25.67, 25.64, 25.58, 25.54. **<sup>31</sup>P NMR (162 MHz, CDCl<sub>3</sub>):** δ 60.16. **HRMS** calcd for C<sub>13</sub>H<sub>21</sub>OPS<sub>3</sub>Na [M+Na]<sup>+</sup> 343.0384, found 343.0391.

S-benzyl S,S-di-sec-butyl phosphorotrithioate(**32**, New Compound.)

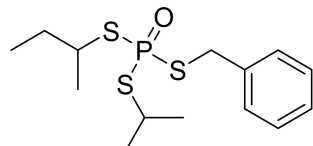

Yellow oil. Yield: 95% (From RCl); Yield: 95% (From RBr).

**<sup>1</sup>H NMR (400 MHz, CDCl<sub>3</sub>):** δ 7.37 (d, *J* = 7.4 Hz, 2H), 7.32 (t, *J* = 7.7 Hz, 2H), 7.26 (t, *J* = 7.1 Hz, 1H), 4.20 (dt, *J* = 11.9 Hz, *J* = 3.4 Hz, 2H), 3.51-3.45 (m, 2H), 1.79-1.69 (m, 4H), 1.47 (d, *J* = 7.0 Hz, 3H), 1.45 (d, *J* = 6.9 Hz, 3H), 1.02 (t, *J* = 7.3 Hz, 3H), 1.01 (t, *J* = 7.2 Hz, 3H). **<sup>13</sup>C NMR (100 MHz, CDCl<sub>3</sub>):** δ 136.6 (d, *J* = 6.6 Hz), 129.4, 128.9, 127.8, 46.9-46.8 (m), 37.3 (d, *J* = 3.3 Hz), 31.5 (d, *J* = 6.4 Hz), 31.4 (d, *J* = 5.6 Hz), 23.2 (t, *J* = 3.4 Hz), 23.1 (t, *J* = 2.2 Hz), 11.43, 11.40. **<sup>31</sup>P NMR (162 MHz, CDCl<sub>3</sub>):** δ 60.16. **HRMS** calcd for C<sub>15</sub>H<sub>25</sub>OPS<sub>3</sub>Na [M+Na]<sup>+</sup> 371.0697, found

371.0704.

*S*-benzyl *S,S*-dicyclohexyl phosphorotrithioate(**33**, New Compound.)

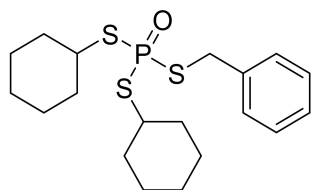

Light yellow oil. Yield: 87% (From RCl); Yield: 88% (From RBr).

**<sup>1</sup>H NMR (400 MHz, CDCl<sub>3</sub>):** δ 7.37 (d, *J* = 7.5 Hz, 2H), 7.32 (t, *J* = 7.5 Hz, 2H), 7.26 (t, *J* = 7.1 Hz, 1H), 4.19 (d, *J* = 12.0 Hz, 2H), 3.49-3.43 (m, 2H), 2.11-1.24 (m, 20H). **<sup>13</sup>C NMR (100 MHz, CDCl<sub>3</sub>):** δ 136.6 (d, *J* = 6.5 Hz), 129.4, 128.9, 127.8, 48.0 (d, *J* = 3.4 Hz), 37.4 (d, *J* = 3.3 Hz), 35.4 (dd, *J* = 12.6 Hz, *J* = 4.7 Hz), 26.0, 25.4. **<sup>31</sup>P NMR (162 MHz, CDCl<sub>3</sub>):** δ 60.70. **HRMS** calcd for C<sub>19</sub>H<sub>29</sub>OPS<sub>3</sub>Na [M+Na]<sup>+</sup> 423.1010, found 423.1010.

*S,S,S*-tribenzyl phosphorotrithioate(**34**, CAS no.14974-76-6)

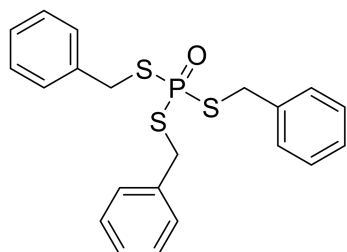

Colorless Wax. Yield: 88%.

**<sup>1</sup>H NMR (400 MHz, CDCl<sub>3</sub>):** δ 7.34-7.24 (m, 15H), 4.17 (d, *J* = 12.7 Hz, 6H). **<sup>13</sup>C NMR (100 MHz, CDCl<sub>3</sub>):** δ 136.3 (d, *J* = 6.6 Hz), 129.4, 129.0, 128.0, 37.1 (d, *J* = 3.3 Hz). **<sup>31</sup>P NMR (162 MHz, CDCl<sub>3</sub>):** δ 61.83. **HRMS** calcd for C<sub>21</sub>H<sub>21</sub>OPS<sub>3</sub>Na [M+Na]<sup>+</sup> 439.0384, found 439.0384.

*S*-butyl *S,S*-dimethyl phosphorotrithioate(**35**, New Compound.)

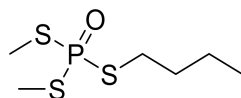

Yellow oil. Yield: 85%.

**<sup>1</sup>H NMR (400 MHz, CDCl<sub>3</sub>):** δ 3.00 (quint, *J* = 7.4 Hz, 2H), 2.43 (d, *J* = 15.8 Hz, 6H), 1.74 (quint, *J* = 7.4 Hz, 2H), 1.45 (dt, *J* = 7.4 Hz, 2H), 0.94 (t, *J* = 7.4 Hz, 3H). **<sup>13</sup>C NMR (100 MHz, CDCl<sub>3</sub>):** δ 32.7 (d, *J* = 5.5 Hz), 32.5 (d, *J* = 4.4 Hz), 22.0, 14.4 (d, *J* = 4.3 Hz), 13.7. **<sup>31</sup>P NMR (162 MHz, CDCl<sub>3</sub>):** δ 67.95. **HRMS** calcd for C<sub>6</sub>H<sub>16</sub>OPS<sub>3</sub> [M+H]<sup>+</sup> 231.0095, found 231.0105.

*S*-butyl *S,S*-diethyl phosphorotrithioate(**36**, New Compound.)

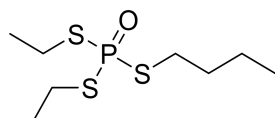

Light yellow oil. Yield: 95%.

**<sup>1</sup>H NMR (400 MHz, CDCl<sub>3</sub>):** δ 3.00 (heptet, *J* = 7.5 Hz, 6H), 1.74 (quint, *J* = 7.5 Hz, 2H), 1.48-1.42 (m, 8H), 0.94 (t, *J* = 7.4 Hz, 3H). **<sup>13</sup>C NMR (100 MHz, CDCl<sub>3</sub>):** δ 32.7 (d, *J* = 3.8 Hz), 32.6 (d, *J* = 4.6 Hz), 27.6 (d, *J* = 3.3 Hz), 21.9, 16.2 (d, *J* = 5.4 Hz), 13.6. **<sup>31</sup>P NMR (162 MHz, CDCl<sub>3</sub>):** δ 64.24. **HRMS** calcd for C<sub>8</sub>H<sub>20</sub>OPS<sub>3</sub> [M+H]<sup>+</sup> 259.0408, found 259.0413.

*S*-butyl *S,S*-diisopropyl phosphorotrithioate(**37**, New Compound.)

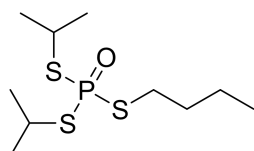

Colorless oil. Yield: 92%.

**<sup>1</sup>H NMR (400 MHz, CDCl<sub>3</sub>):** δ 3.63 (heptet\*d, *J* = 13.7 Hz, *J* = 7.0 Hz, 2H), 2.98 (quint, *J* = 7.2 Hz, 2H), 1.73 (quint, *J* = 7.4 Hz, 2H), 1.48-1.43 (m, 14H), 0.94 (t, *J* = 7.3 Hz, 3H). **<sup>13</sup>C NMR (100 MHz, CDCl<sub>3</sub>):** δ 40.4 (d, *J* = 3.4 Hz), 33.0 (d, *J* = 4.3 Hz), 32.6 (d, *J* = 5.5 Hz), 25.60 (d, *J* = 3.3 Hz), 25.56 (d, *J* = 3.5 Hz), 21.9, 13.7. **<sup>31</sup>P NMR (162 MHz, CDCl<sub>3</sub>):** δ 61.25. **HRMS** calcd for C<sub>10</sub>H<sub>24</sub>OPS<sub>3</sub> [M+H]<sup>+</sup> 287.0721, found 287.0730.

*S,S*-di-*sec*-butyl *S*-butyl phosphorotrithioate(**38**, New Compound.)

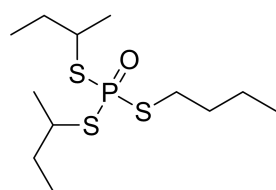

Colorless oil. Yield: 81%.

**<sup>1</sup>H NMR (400 MHz, CDCl<sub>3</sub>):** δ 3.51-3.43 (m, 2H), 3.01-2.95 (m, 2H), 1.79-1.70 (m, 6H), 1.48-1.43 (m, 8H), 1.02 (t, *J* = 7.3 Hz, 6H), 0.94 (t, *J* = 7.4 Hz, 3H). **<sup>13</sup>C NMR (100 MHz, CDCl<sub>3</sub>):** δ 46.73-46.65 (m), 33.0 (d, *J* = 4.3 Hz), 32.6 (d, *J* = 5.5 Hz), 31.45 (d, *J* = 6.2 Hz), 31.40 (d, *J* = 6.6 Hz), 23.1 (t, *J* = 3.8 Hz), 23.0 (t, *J* = 2.2 Hz), 21.9, 13.6, 11.39, 11.37. **<sup>31</sup>P NMR (162 MHz, CDCl<sub>3</sub>):** δ 61.78. **HRMS** calcd for C<sub>12</sub>H<sub>27</sub>OPS<sub>3</sub>Na [M+Na]<sup>+</sup> 337.0854, found 337.0858.

*S,S*-dicyclohexyl *S*-butyl phosphorotrithioate(**39**, New Compound.)

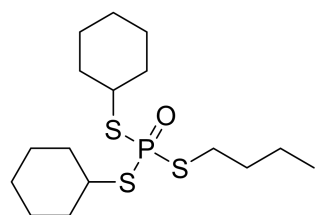

Colorless oil. Yield: 80%.

**<sup>1</sup>H NMR (400 MHz, CDCl<sub>3</sub>):** δ 3.48-3.43 (m, 2H), 2.98 (quint, *J* = 7.0 Hz, 2H), 2.14-2.12 (m, 4H), 1.76-1.71 (m, 6H), 1.61-1.55 (m, 6H), 1.46-1.41 (m, 6H), 1.31-1.27 (m, 2H), 0.94 (t, *J* = 7.4 Hz, 3H). **<sup>13</sup>C NMR (100 MHz, CDCl<sub>3</sub>):** δ 47.9 (d, *J* = 4.4 Hz), 35.4 (d, *J* = 3.4 Hz), 33.1 (d, *J* = 4.3 Hz), 32.5 (d, *J* = 5.5 Hz), 26.0, 25.4, 21.9, 13.7. **<sup>31</sup>P NMR (162 MHz, CDCl<sub>3</sub>):** δ 61.64. **HRMS** calcd for C<sub>16</sub>H<sub>31</sub>OPS<sub>3</sub>Na [M+Na]<sup>+</sup> 389.1167, found 389.1159.

*S,S*-dibenzyl *S*-butyl phosphorotrithioate(**40**, New Compound.)

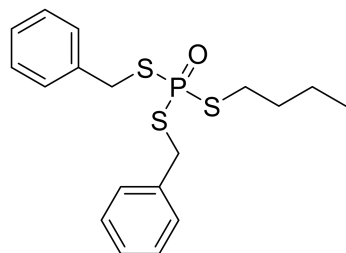

Colorless oil. Yield: 80%.

**<sup>1</sup>H NMR (400 MHz, CDCl<sub>3</sub>):** δ 7.36-7.25 (m, 10H), 4.18 (d, *J* = 12.5 Hz, 4H), 2.97 (quint, *J* = 7.5 Hz, 2H), 1.70 (quint, *J* = 7.5 Hz, 2H), 1.41 (dt, *J* = 7.4 Hz, 2H), 0.92 (t, *J* = 7.4 Hz, 3H). **<sup>13</sup>C NMR (100 MHz, CDCl<sub>3</sub>):** δ 136.4 (d, *J* = 6.6 Hz), 129.4, 128.9, 127.9, 37.0 (d, *J* = 3.3 Hz), 32.9 (d, *J* = 4.4 Hz), 32.7 (d, *J* = 5.5 Hz), 21.9, 13.7. **<sup>31</sup>P NMR (162 MHz, CDCl<sub>3</sub>):** δ 62.08. **HRMS** calcd for C<sub>18</sub>H<sub>24</sub>OPS<sub>3</sub> [M+H]<sup>+</sup> 383.0721, found 383.0720.

# $^1\text{H}$ , $^{13}\text{C}$ , $^{31}\text{P}$ and $^{19}\text{F}$ NMR spectra

3

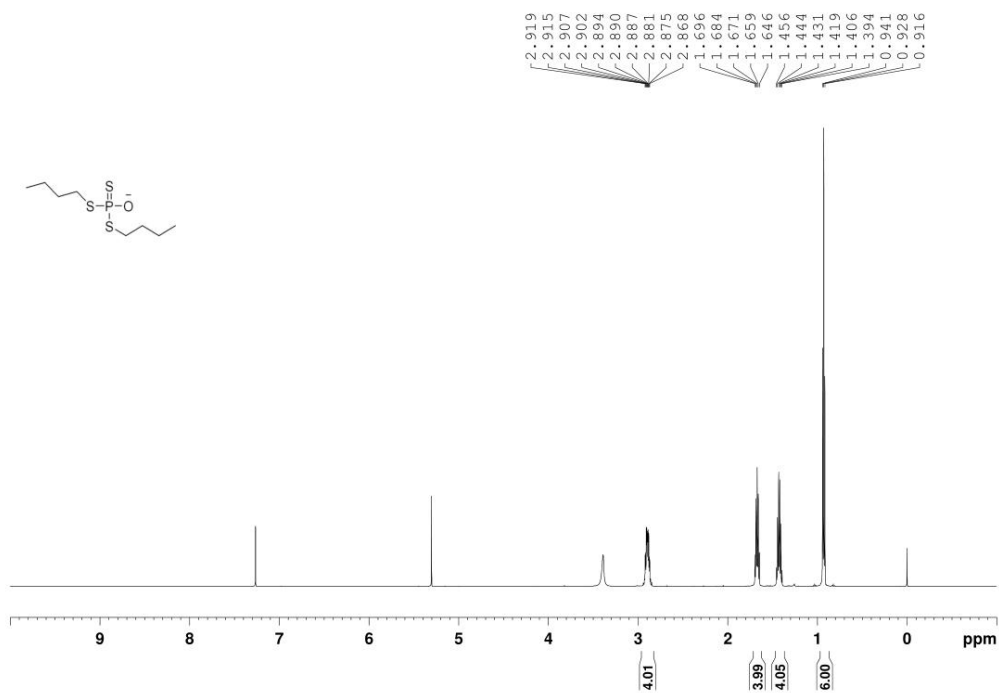

3

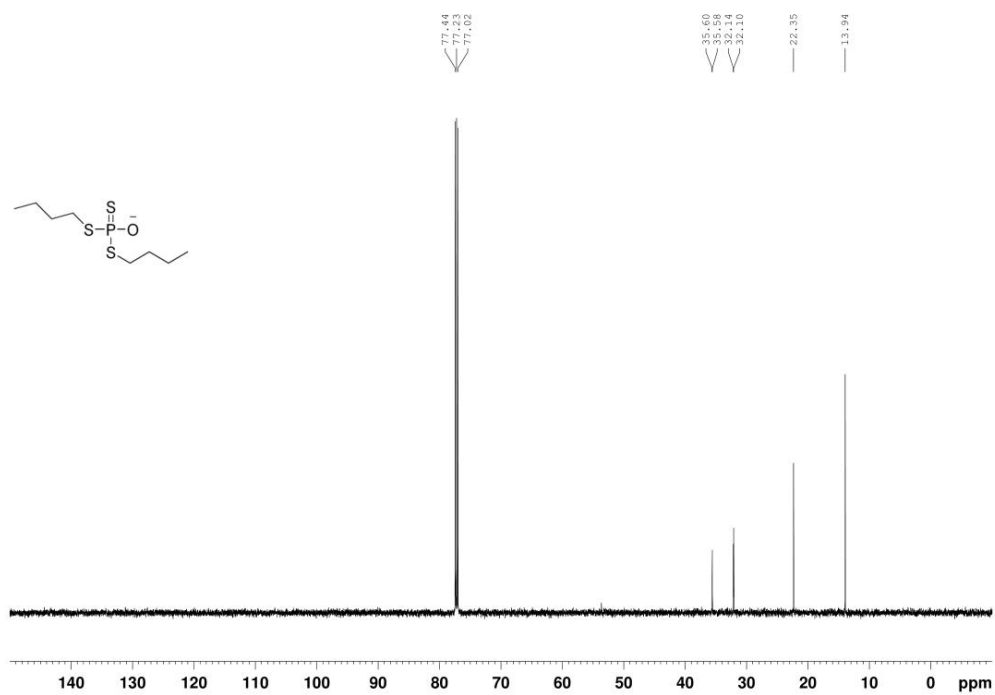

3

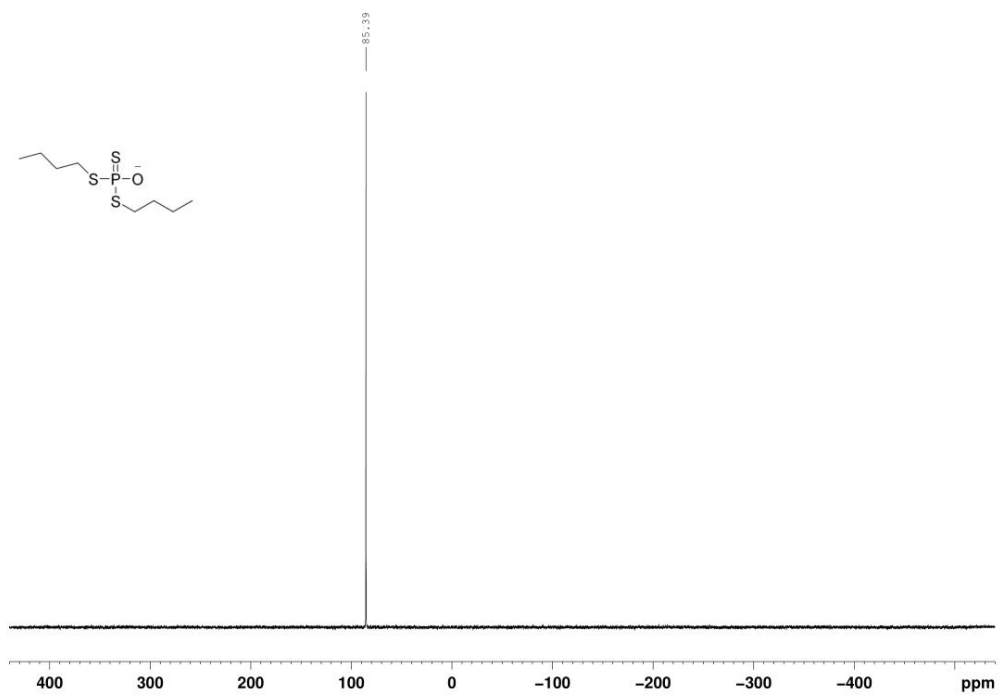

4

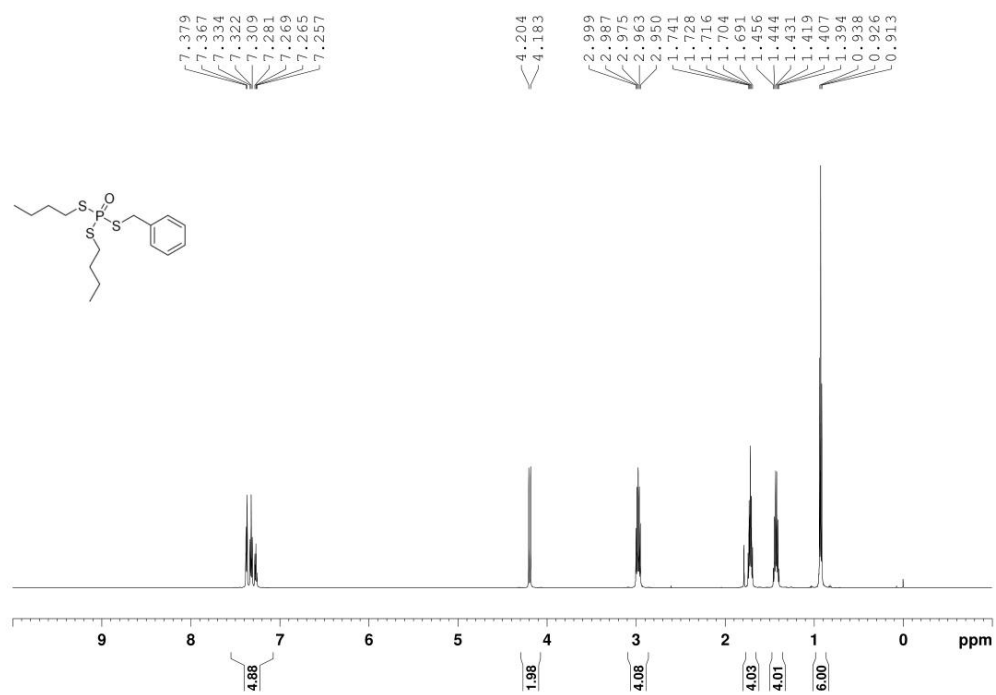



4

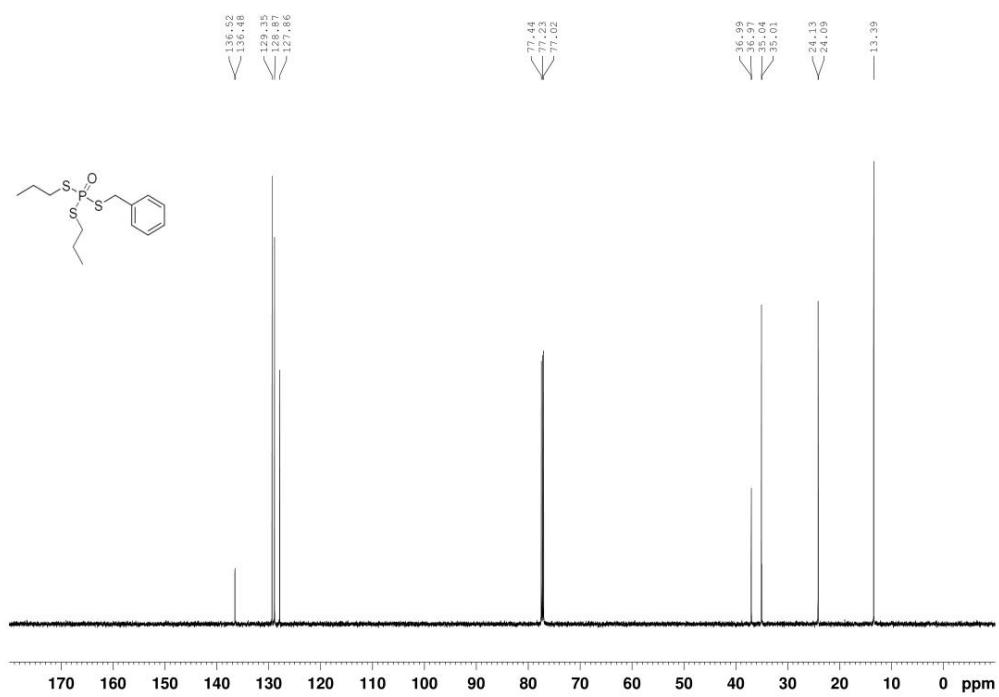

4

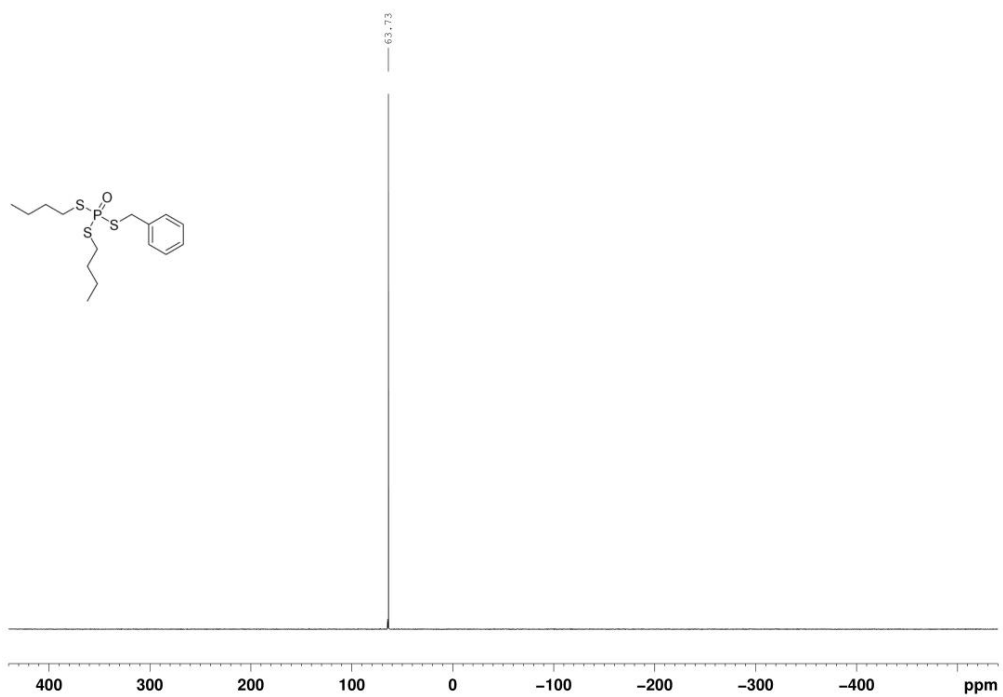

5

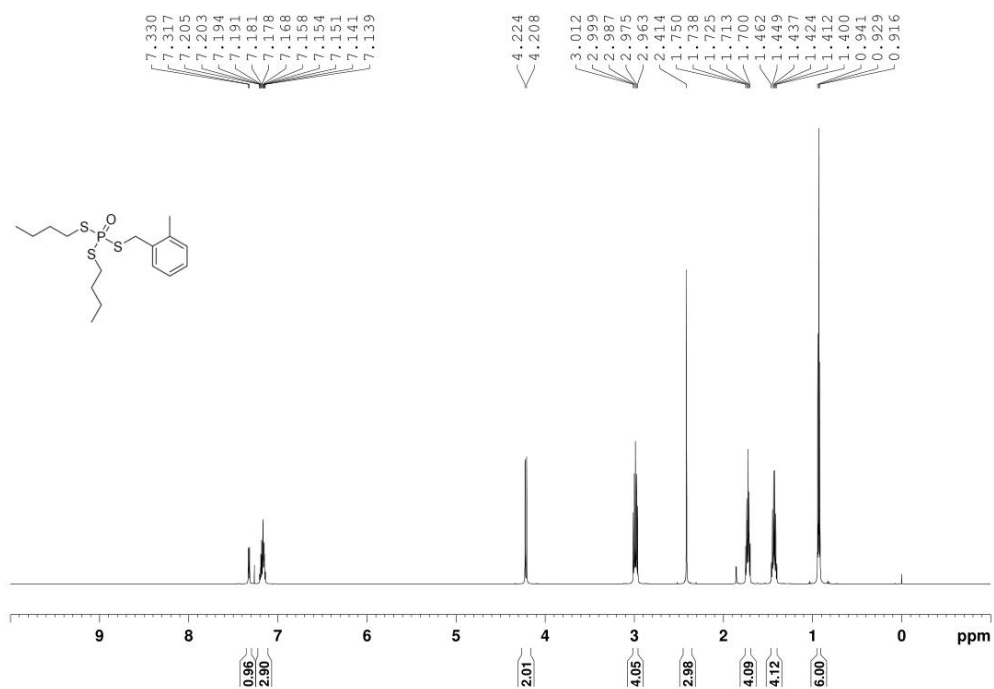

5

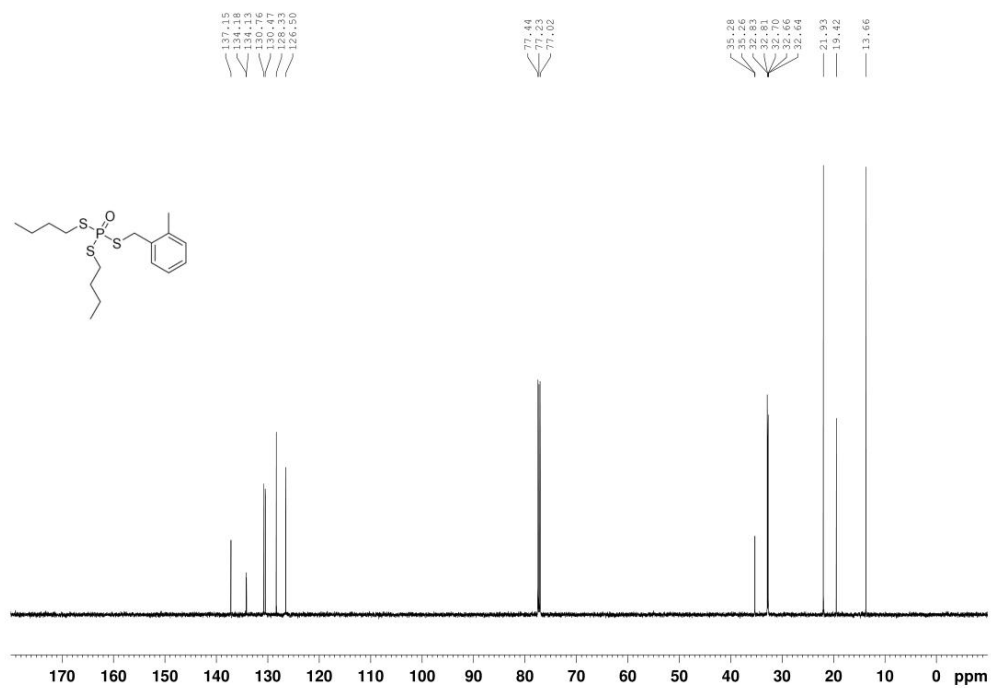

5

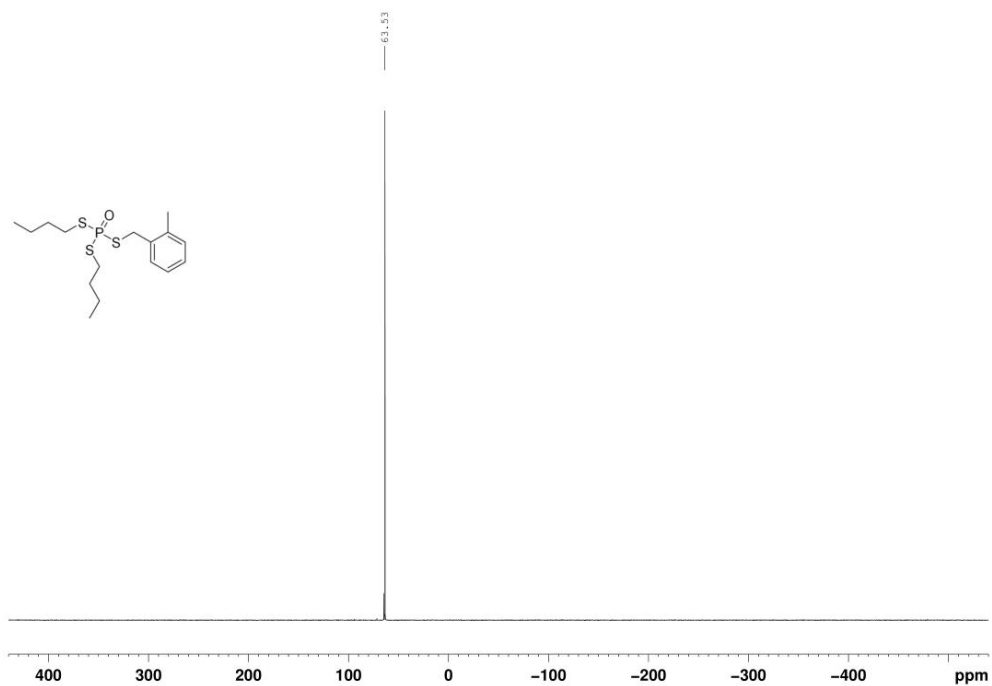

6

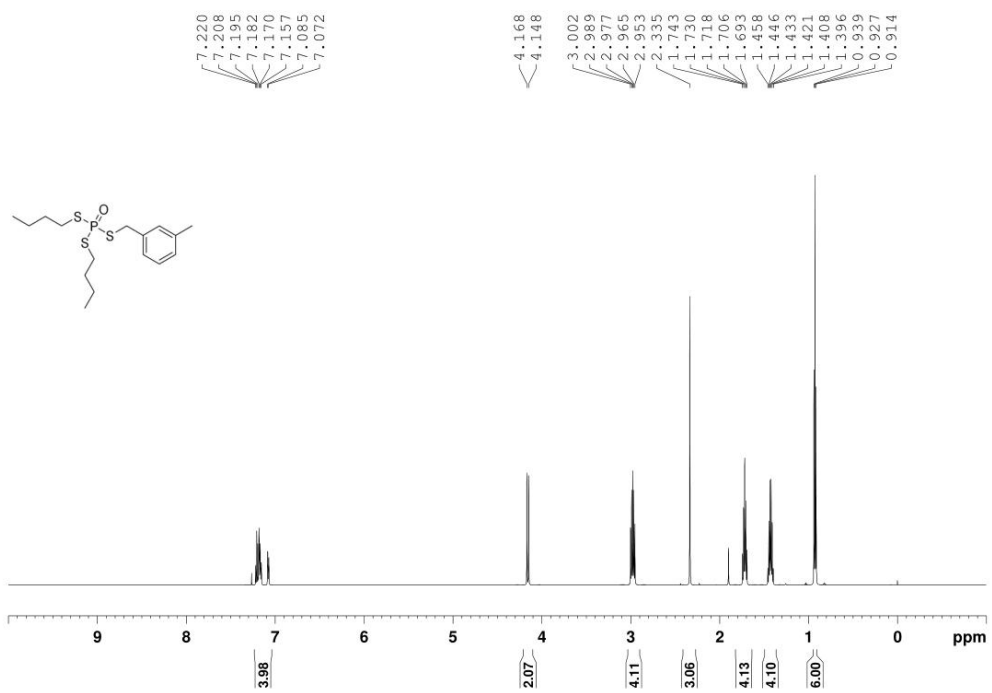

6

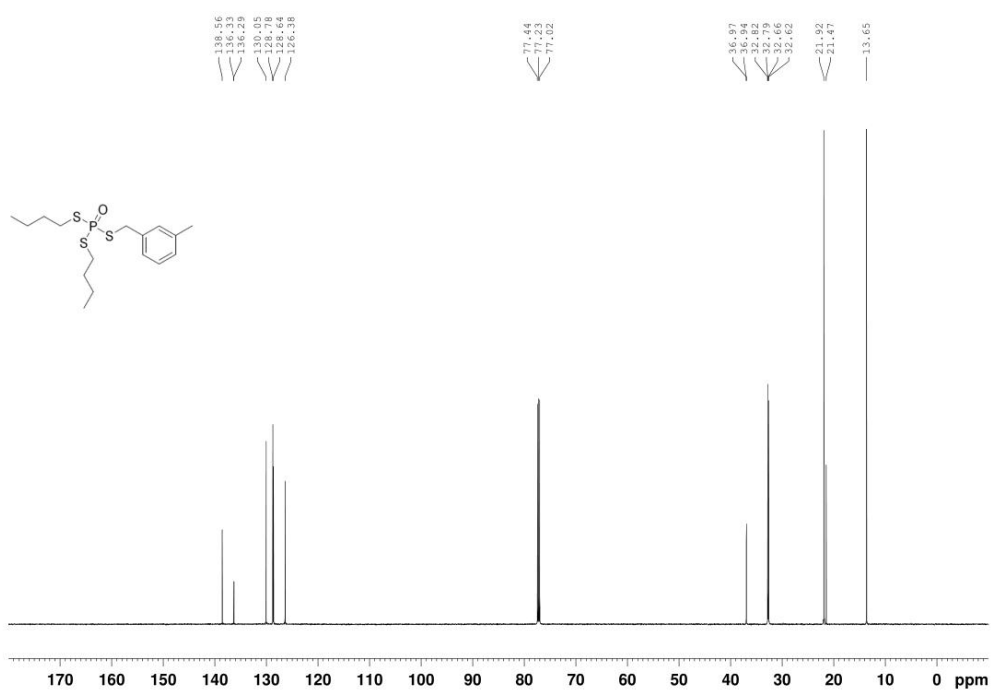

6

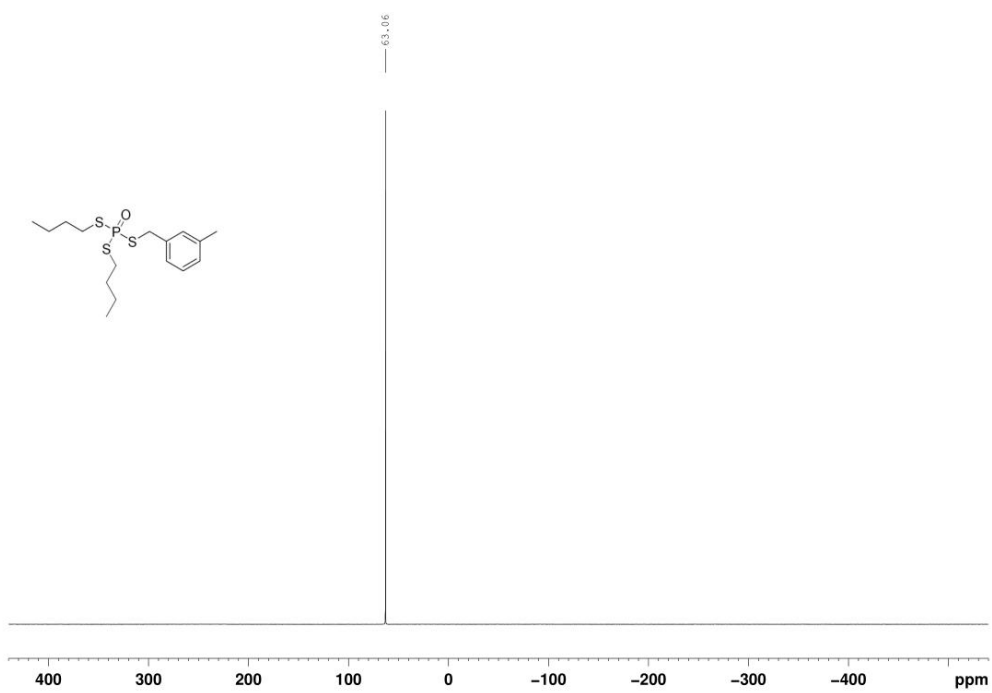

7

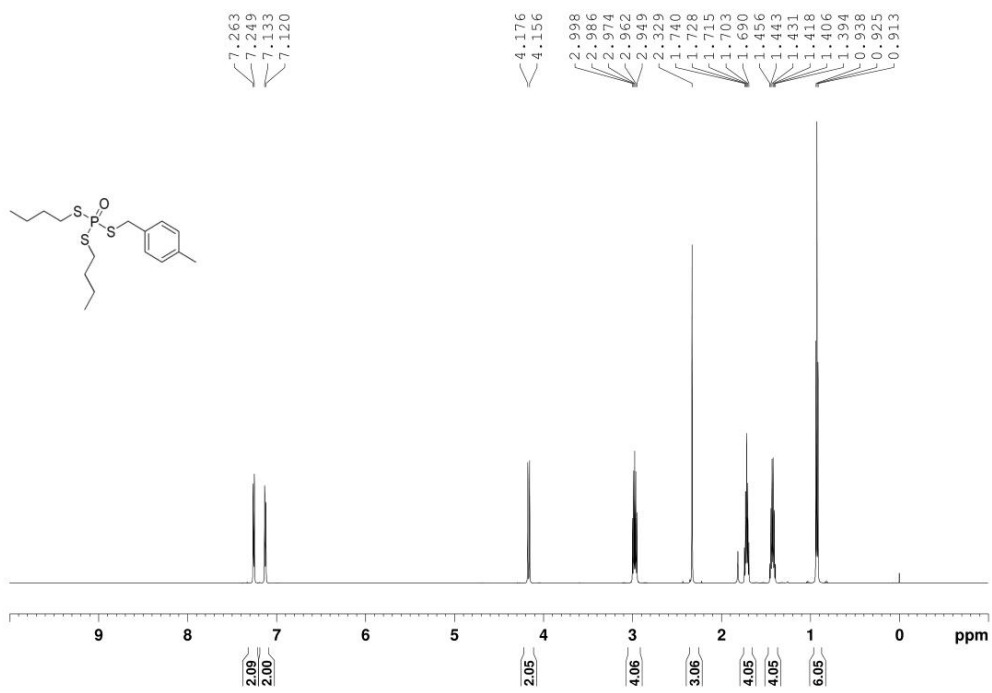

7

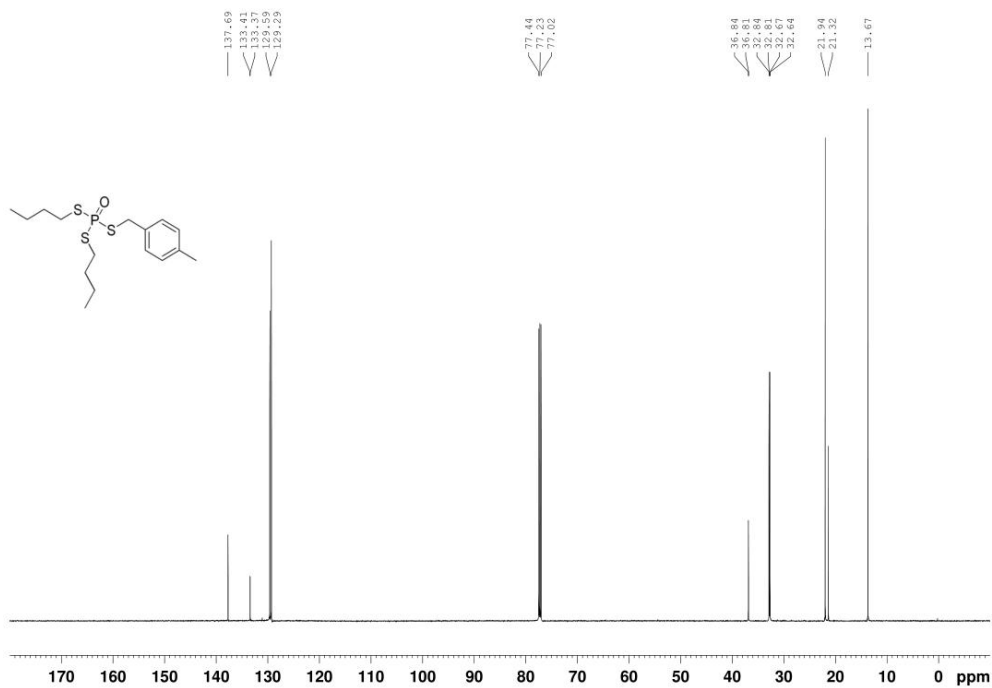

7

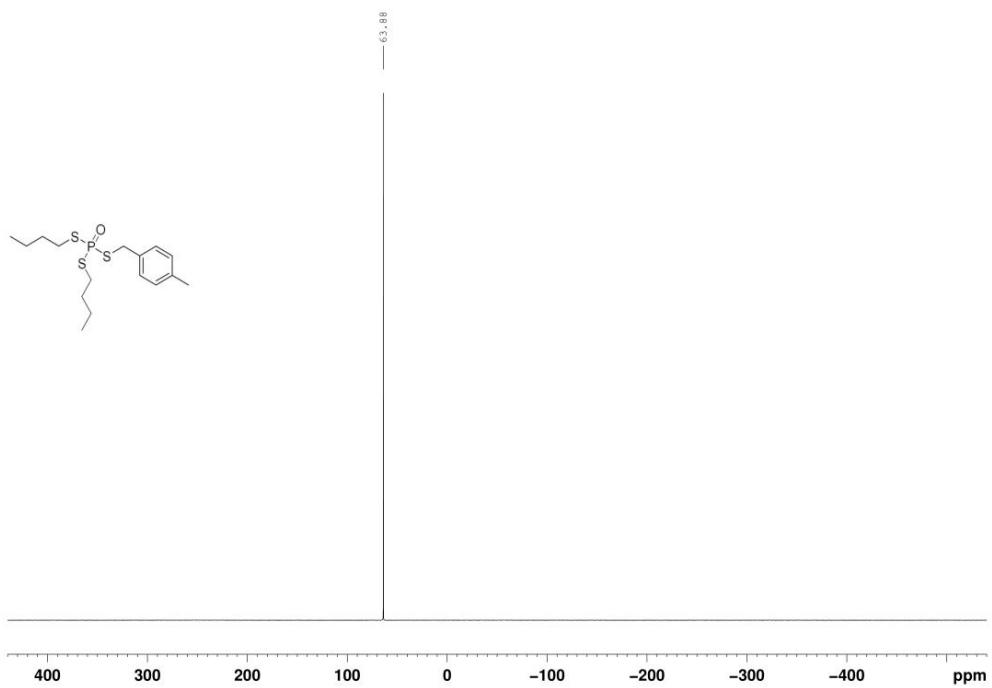

8

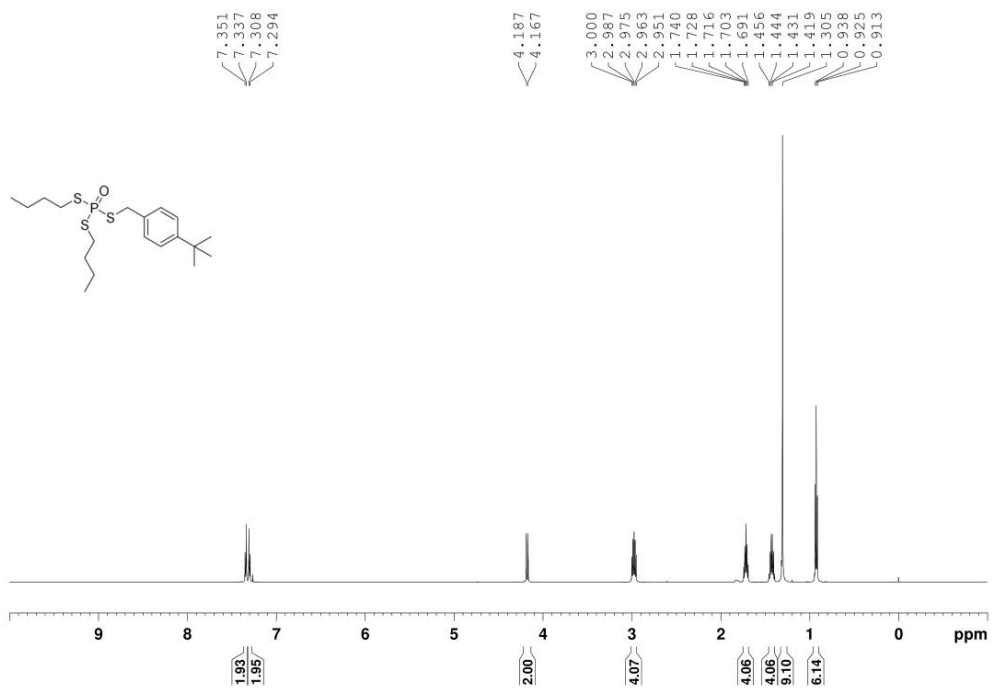

8

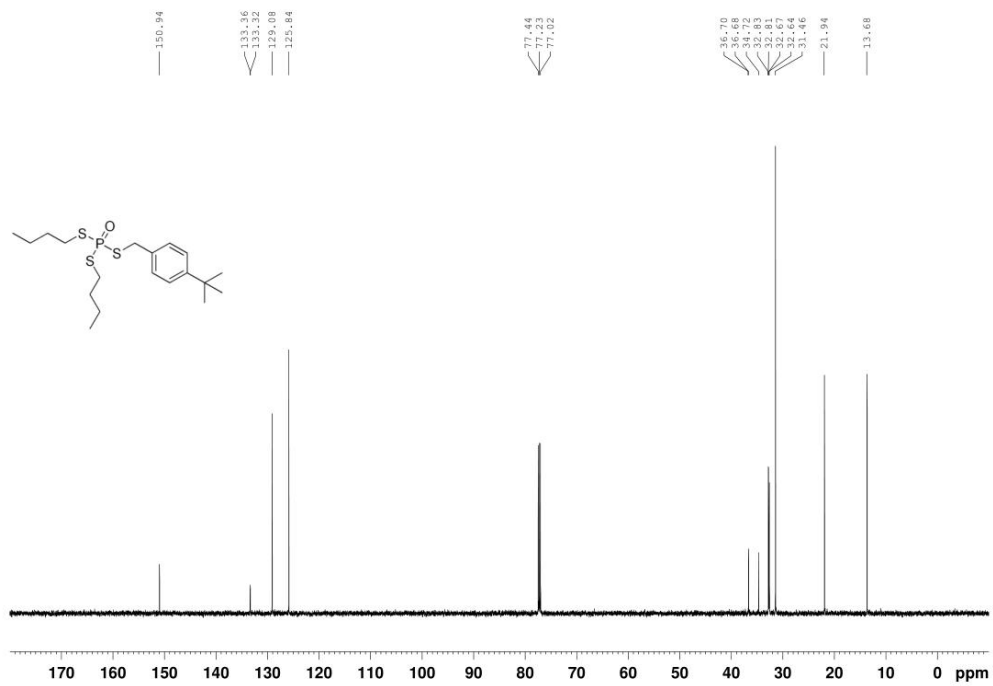

8

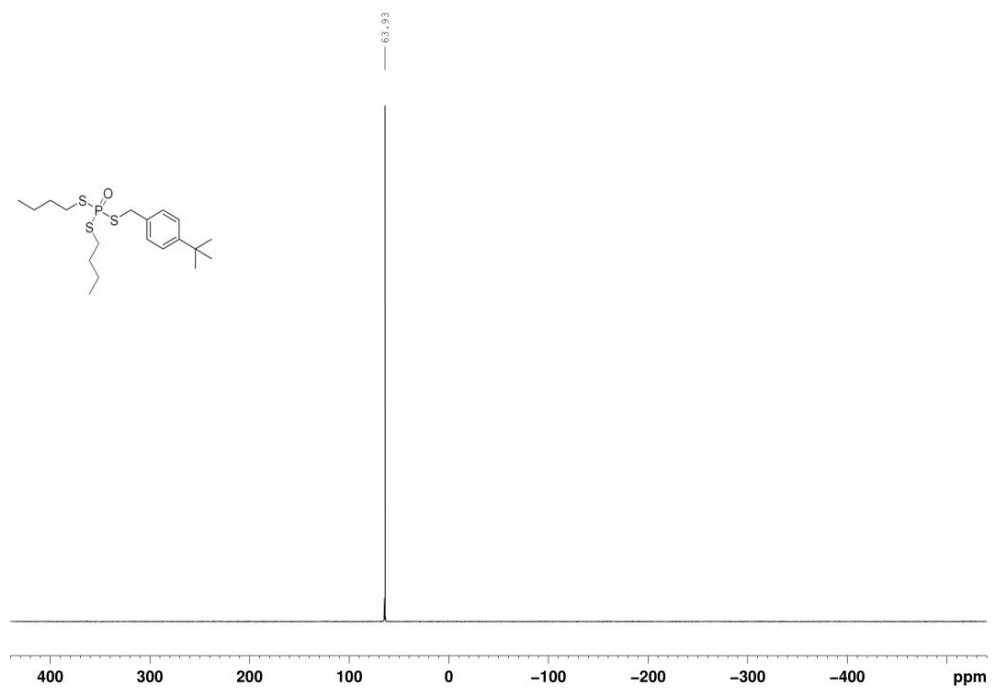

9

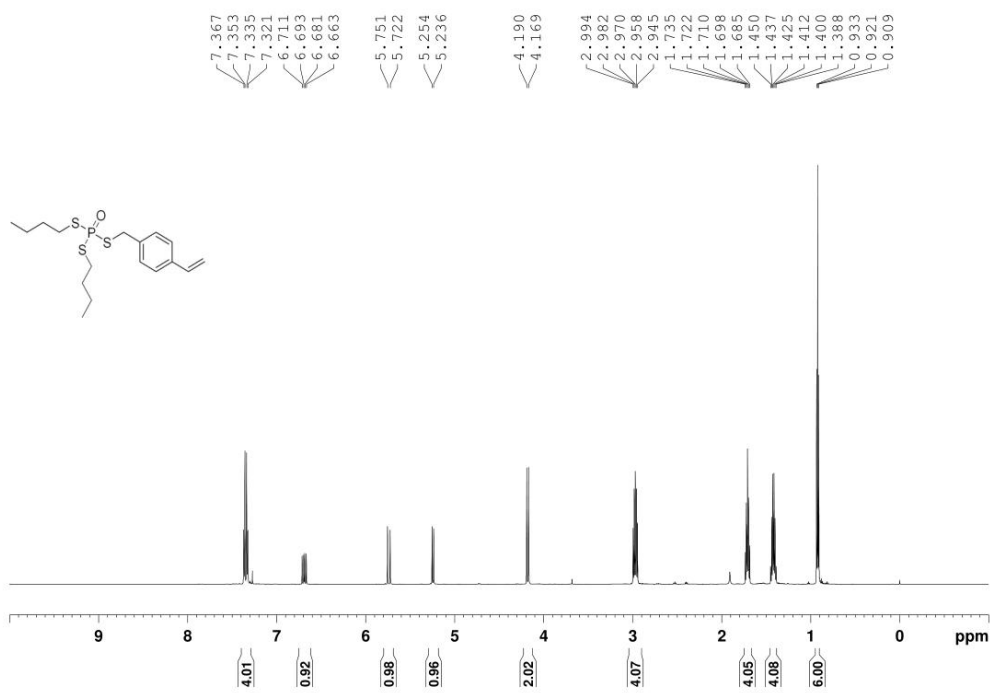

9

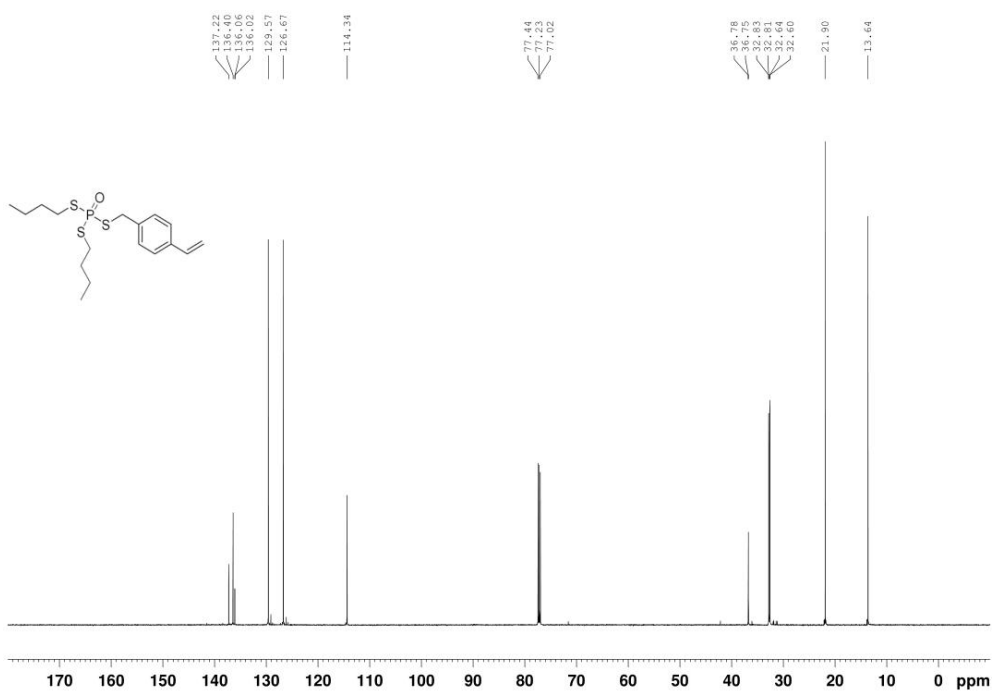



9

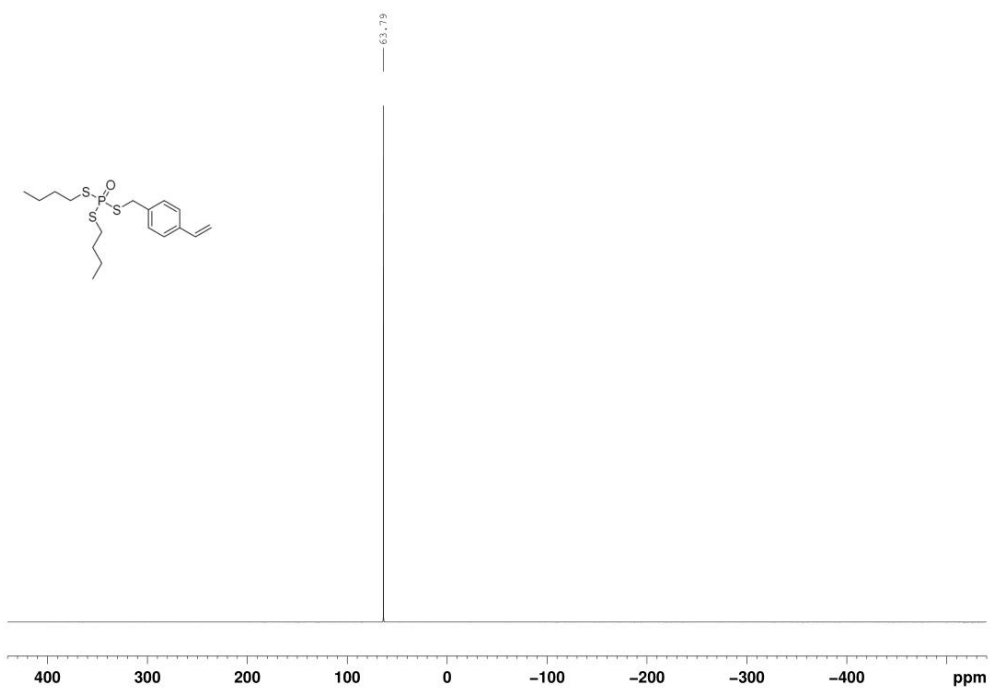

10

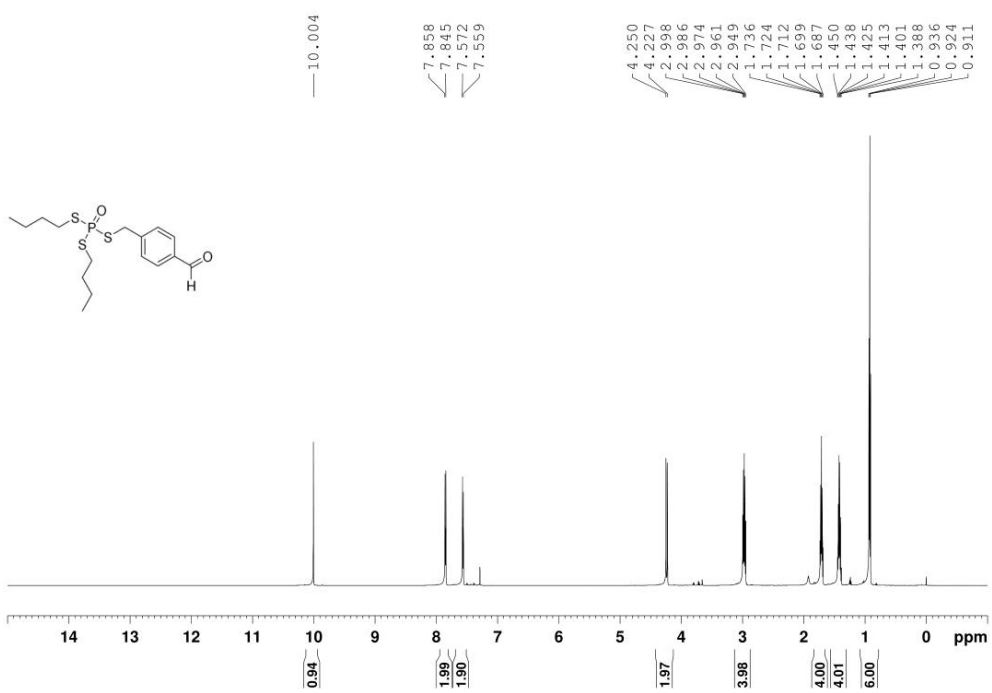

10

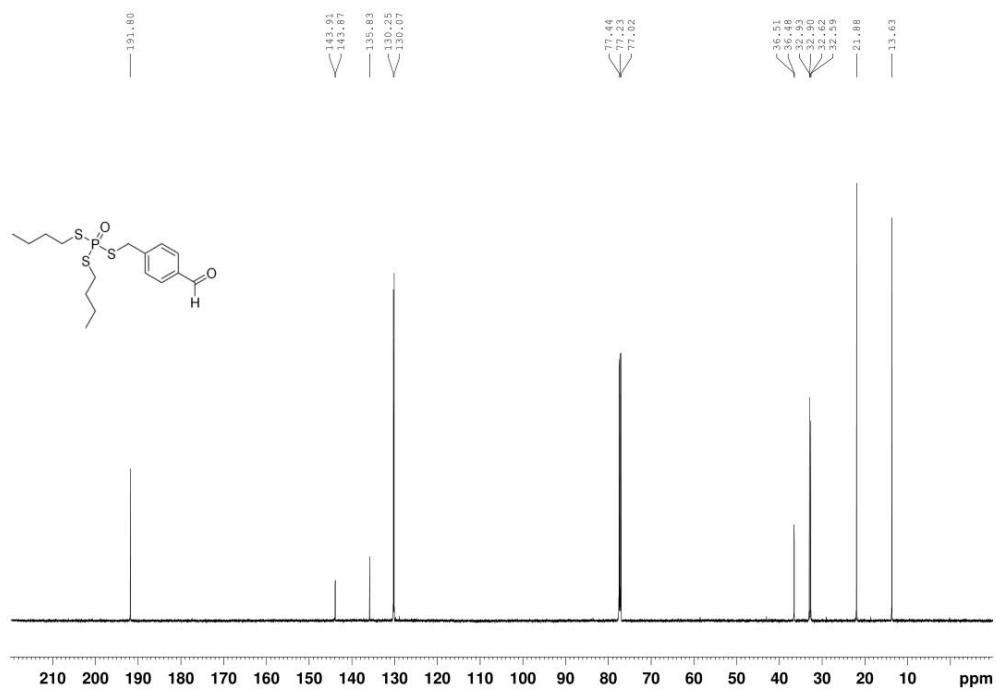

10

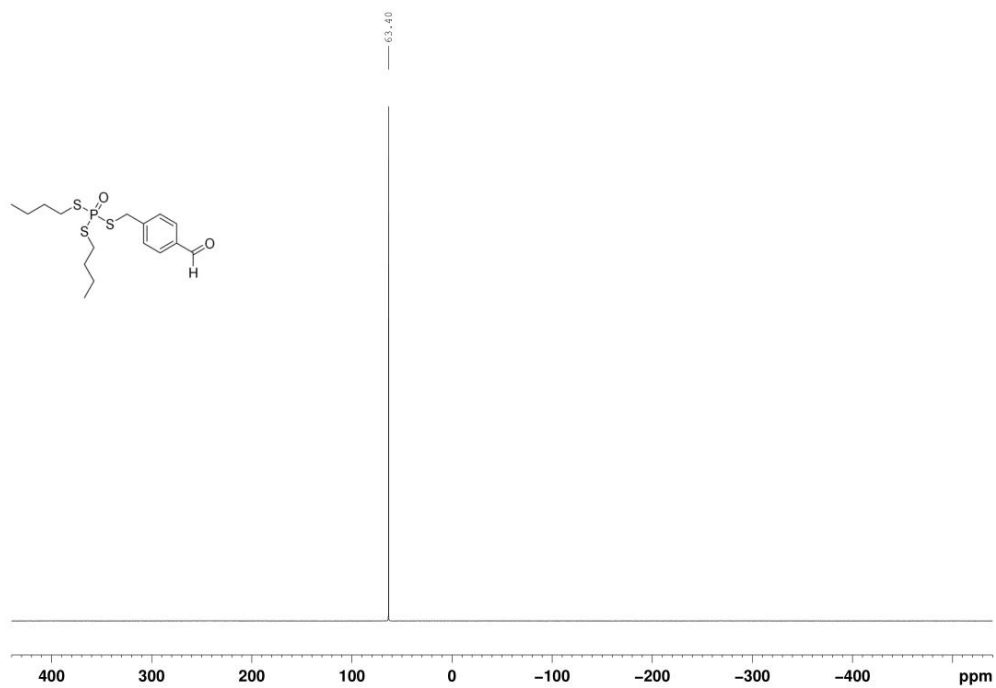

11

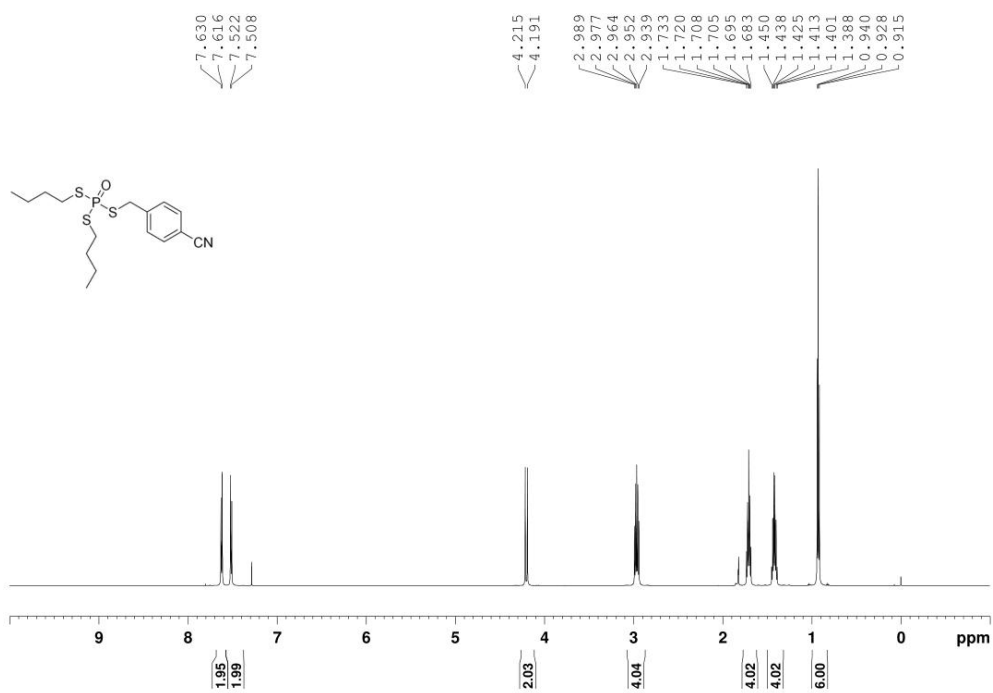

11

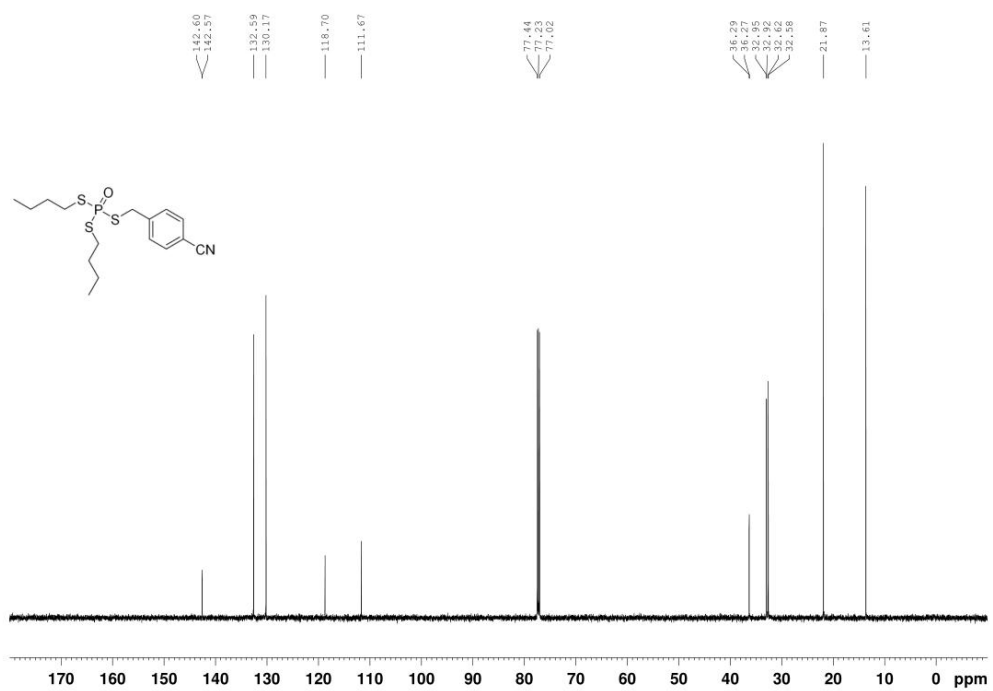

11

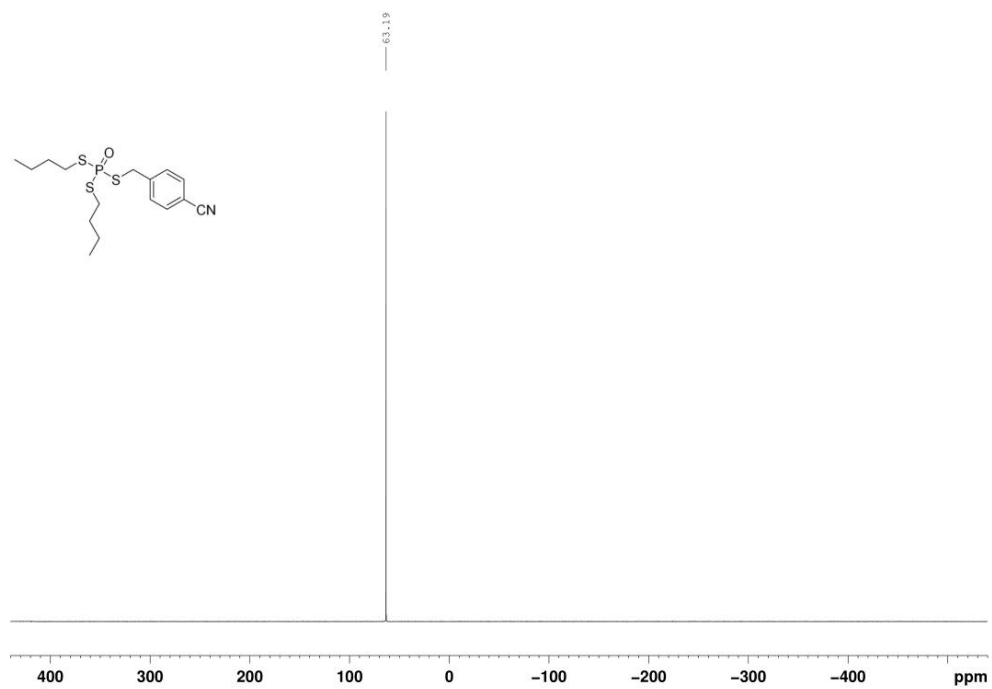

12

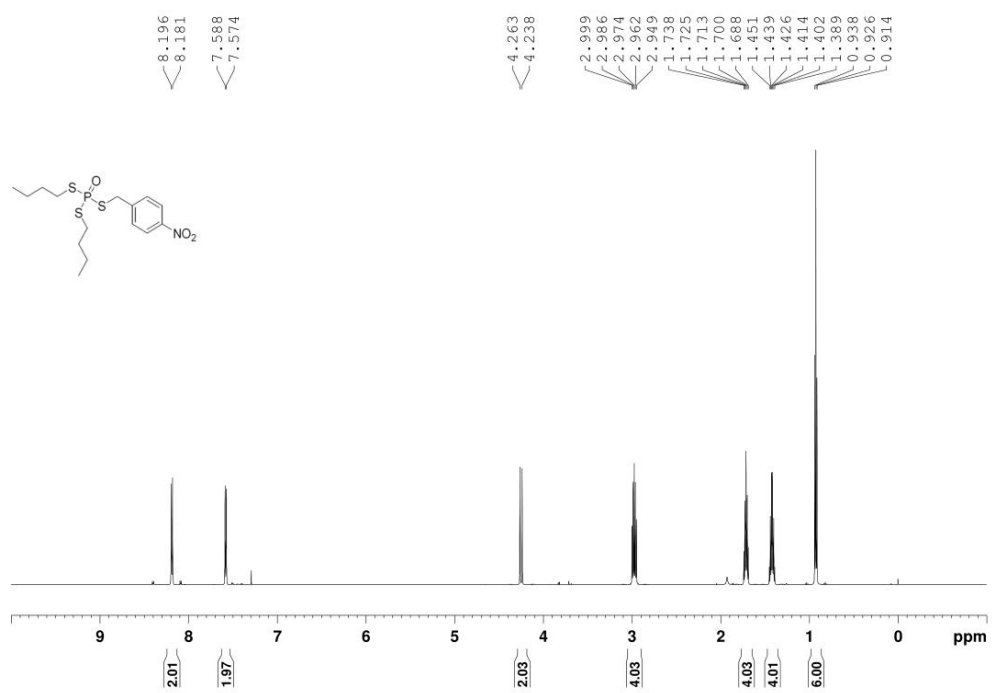

12

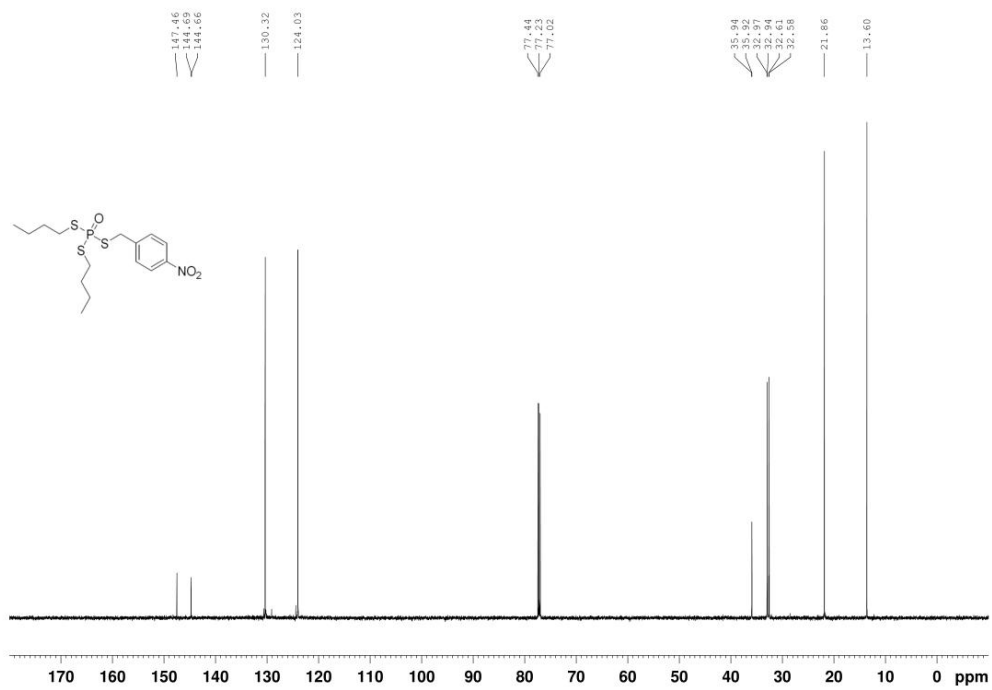

12

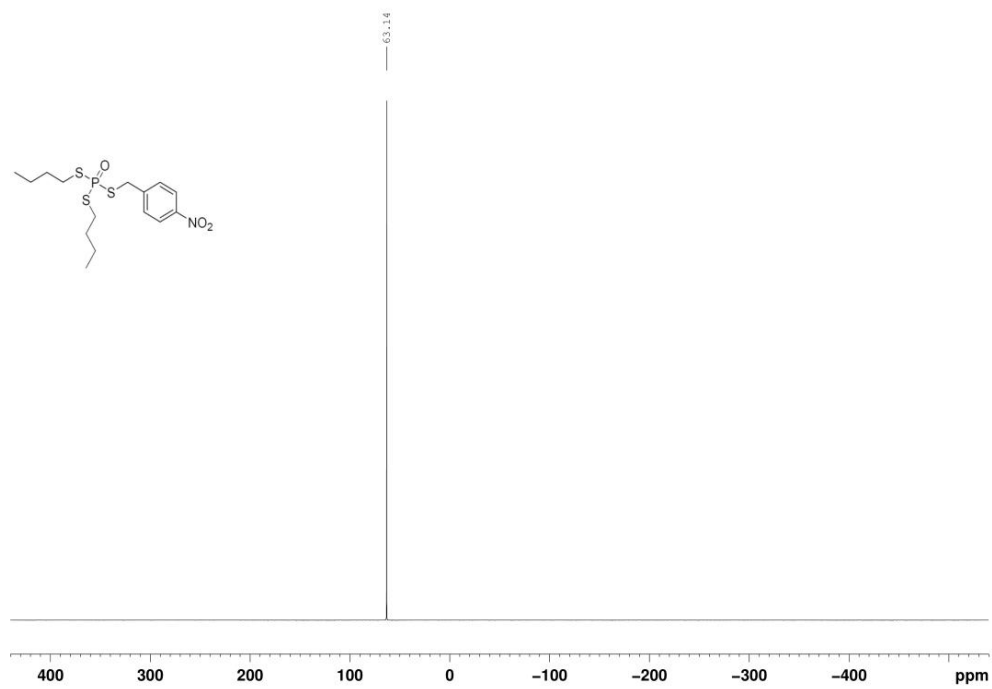

13

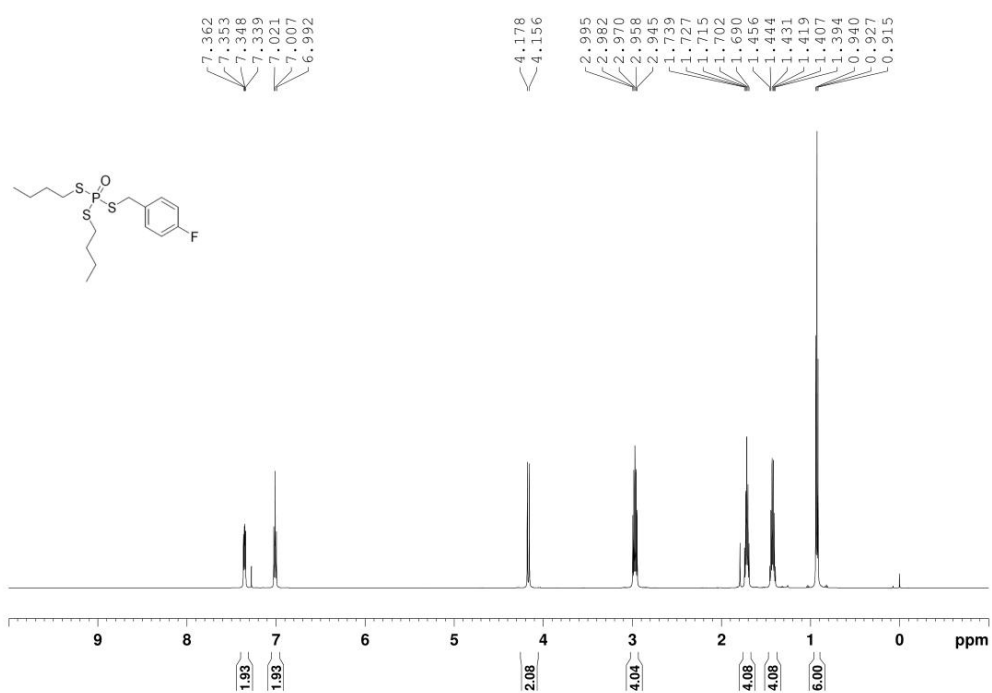

13

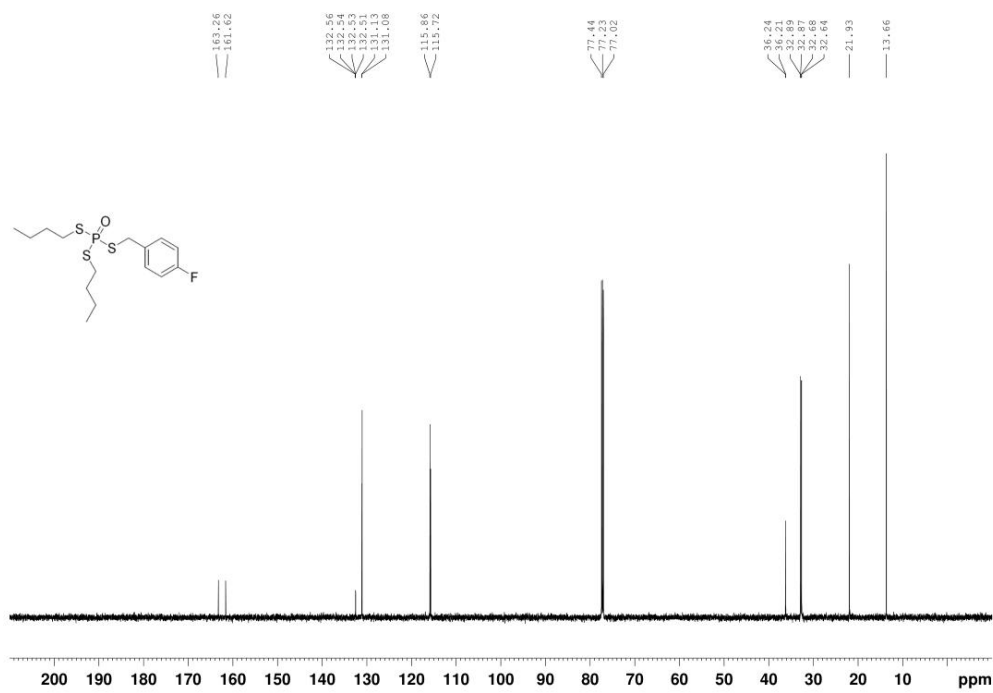

13

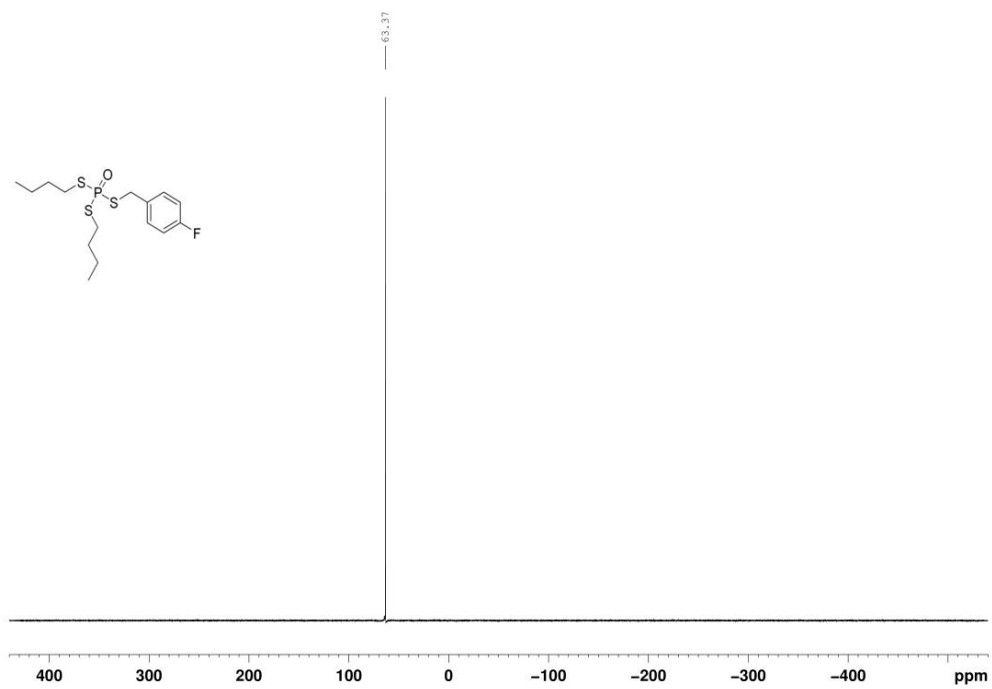

13

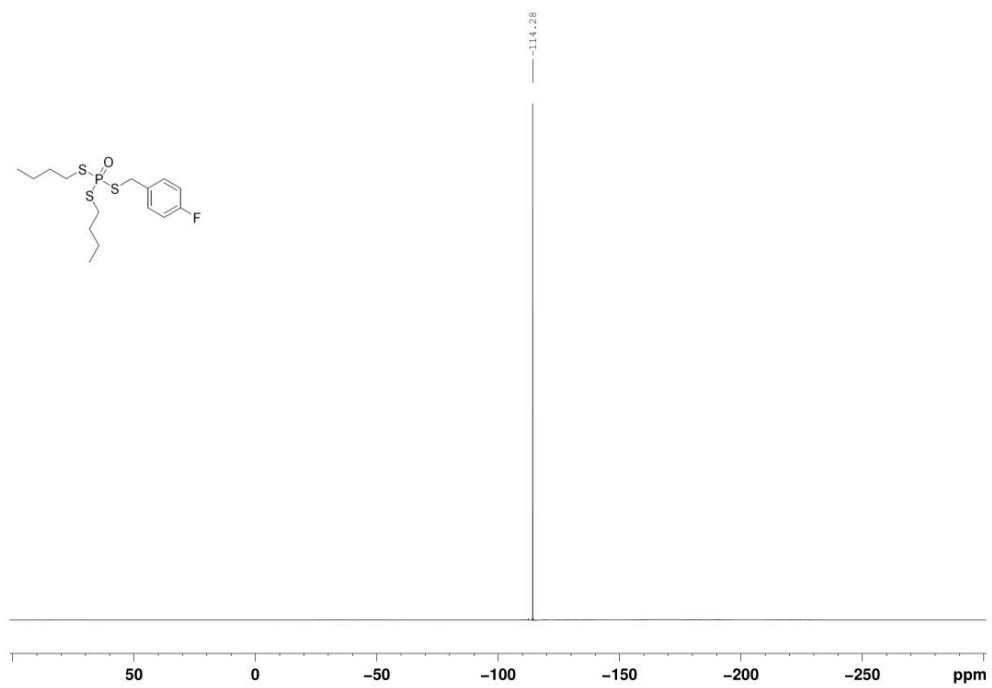

14

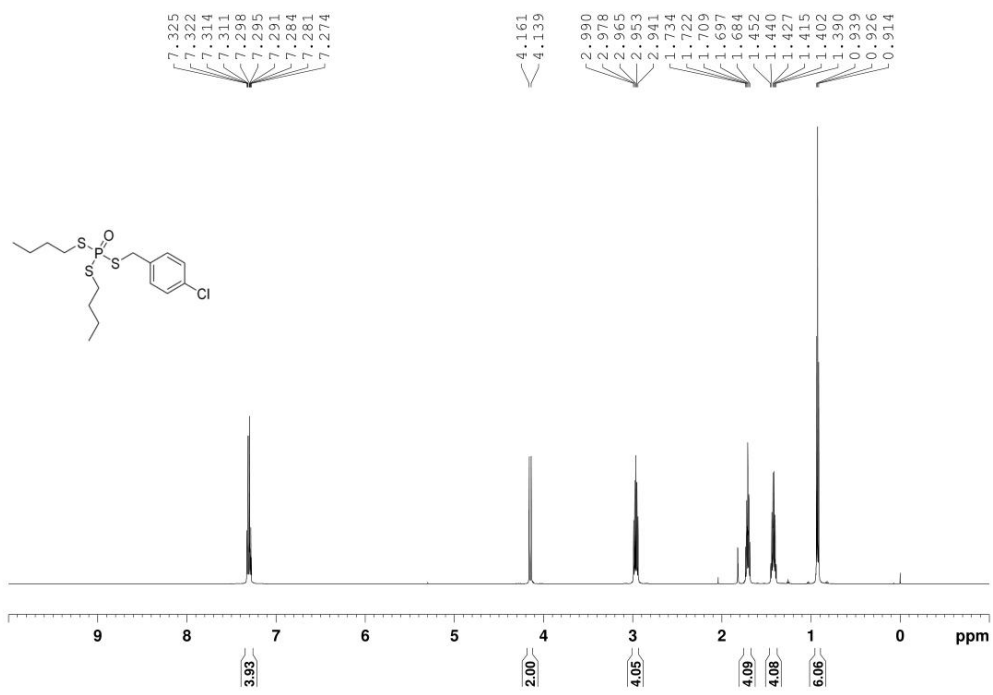

14

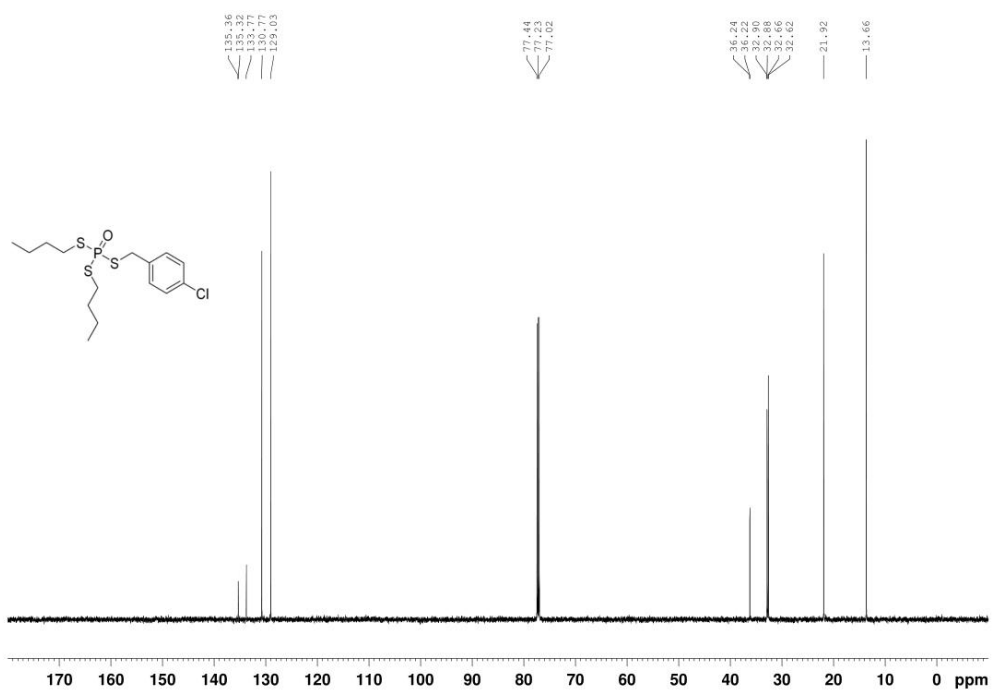



14

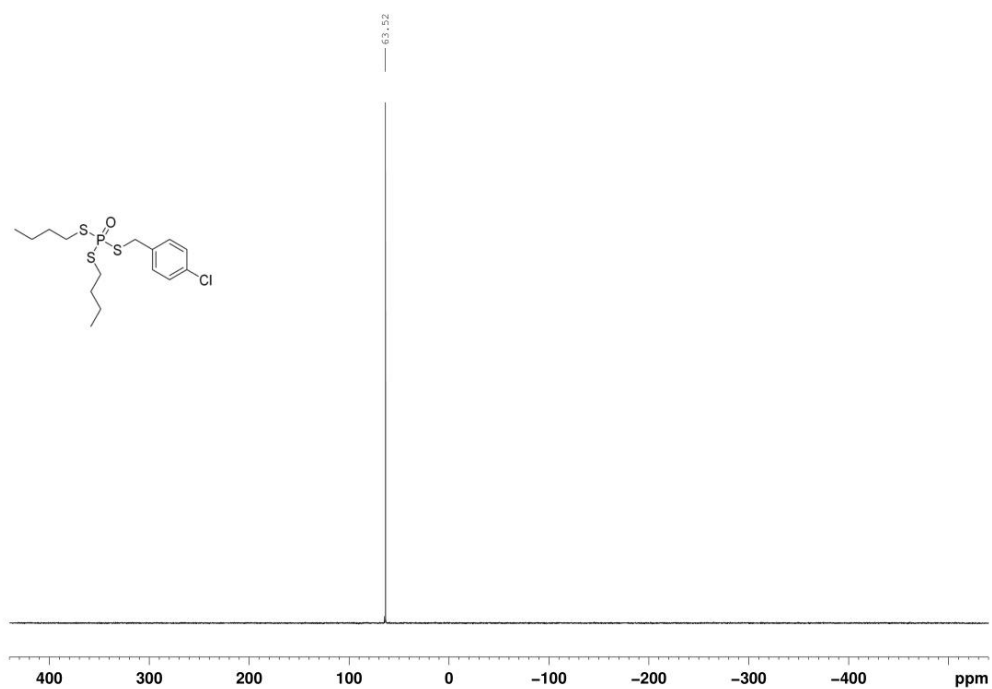

15

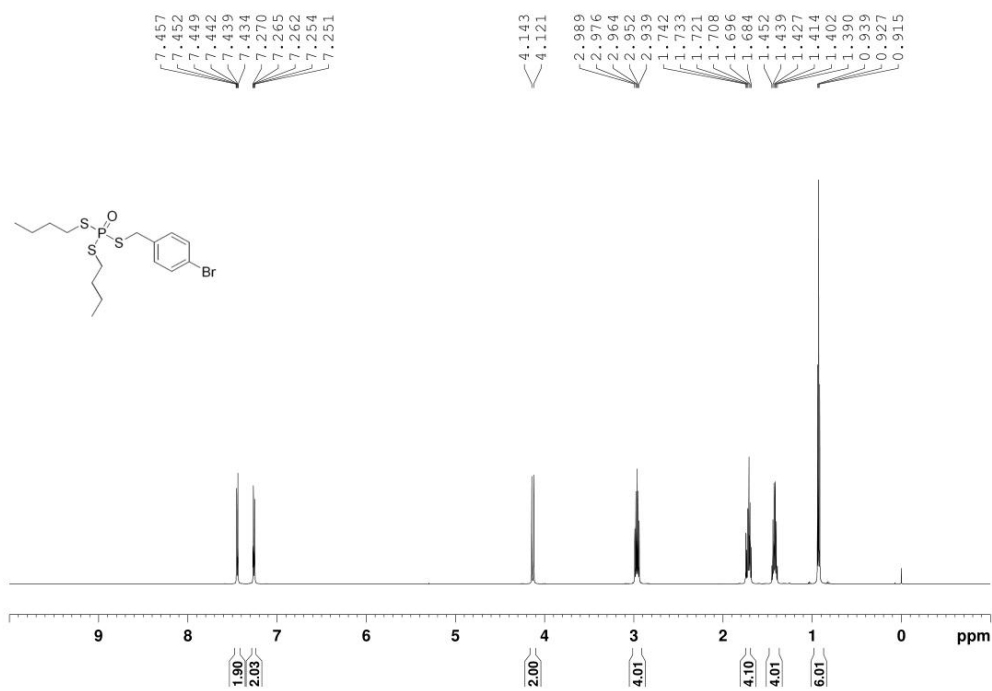

15

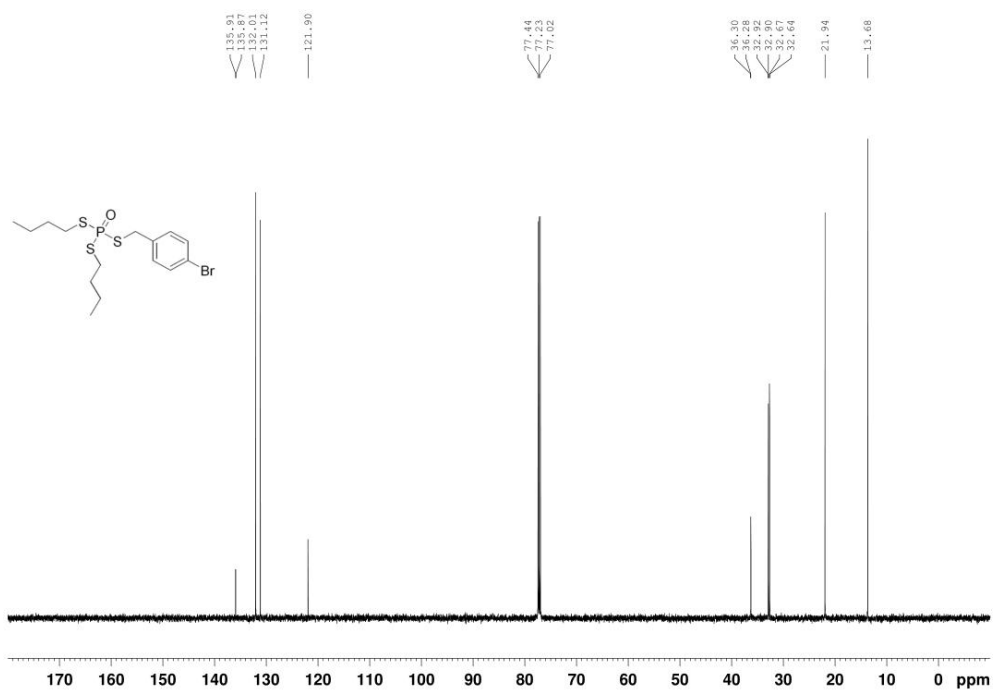

15

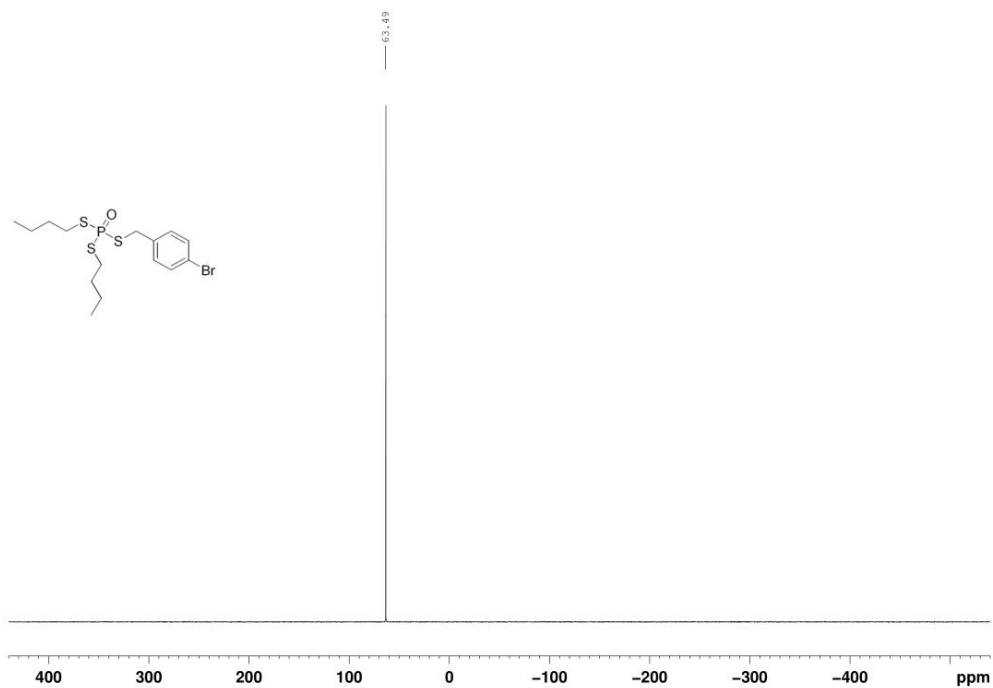

16

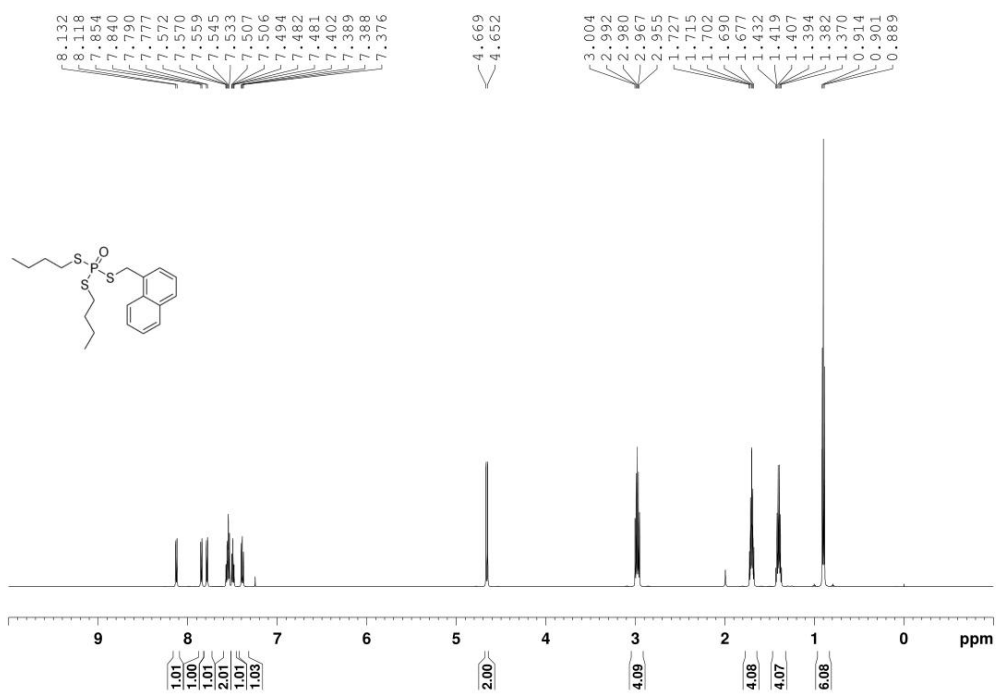

16

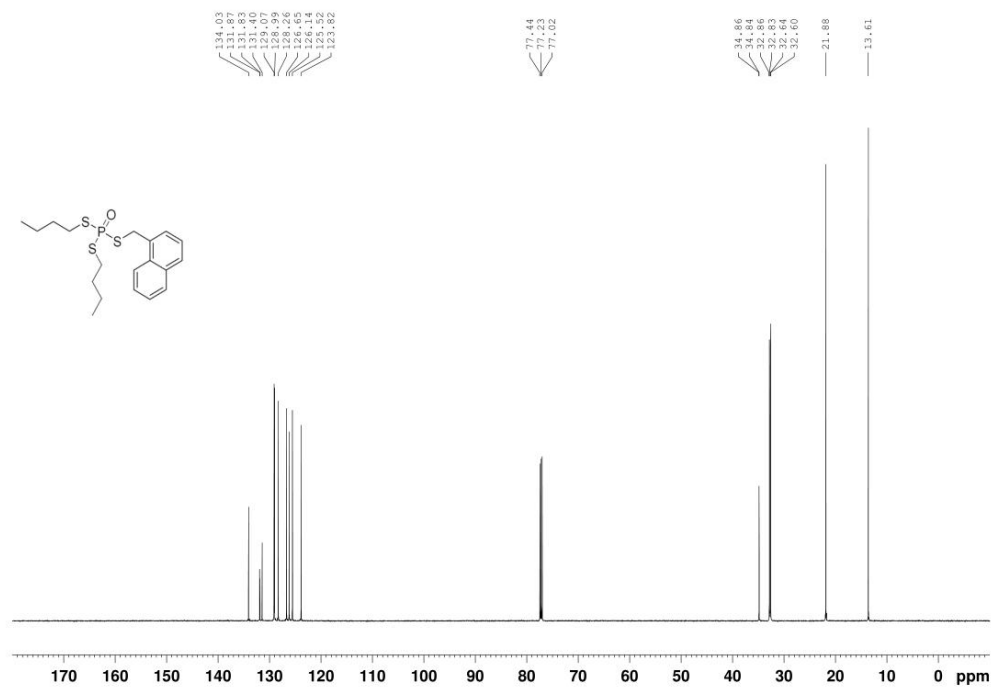

16

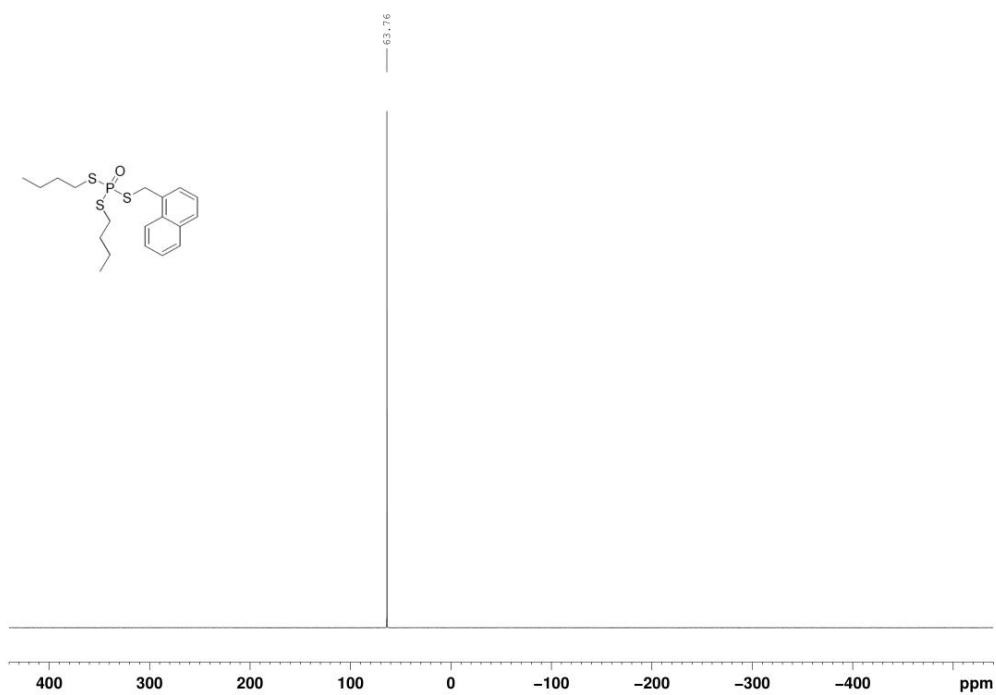

17

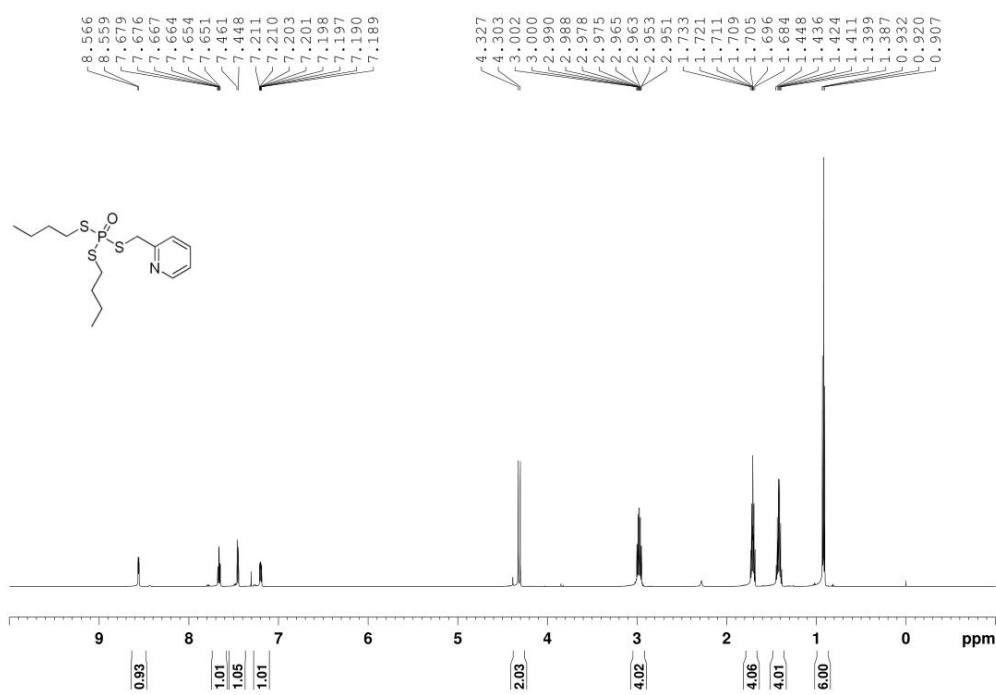

17

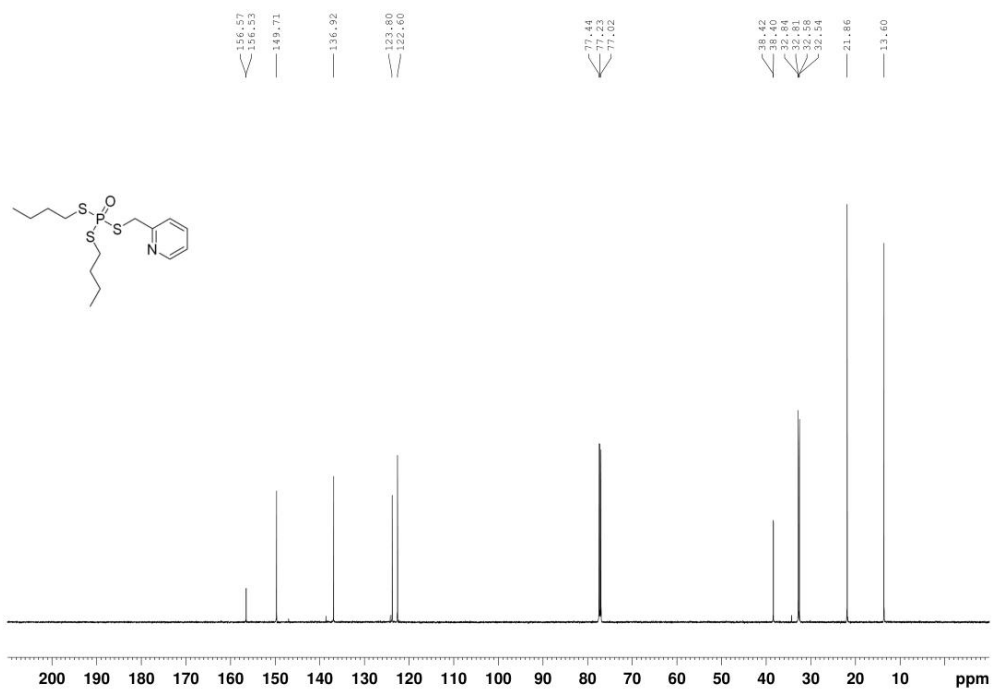

17

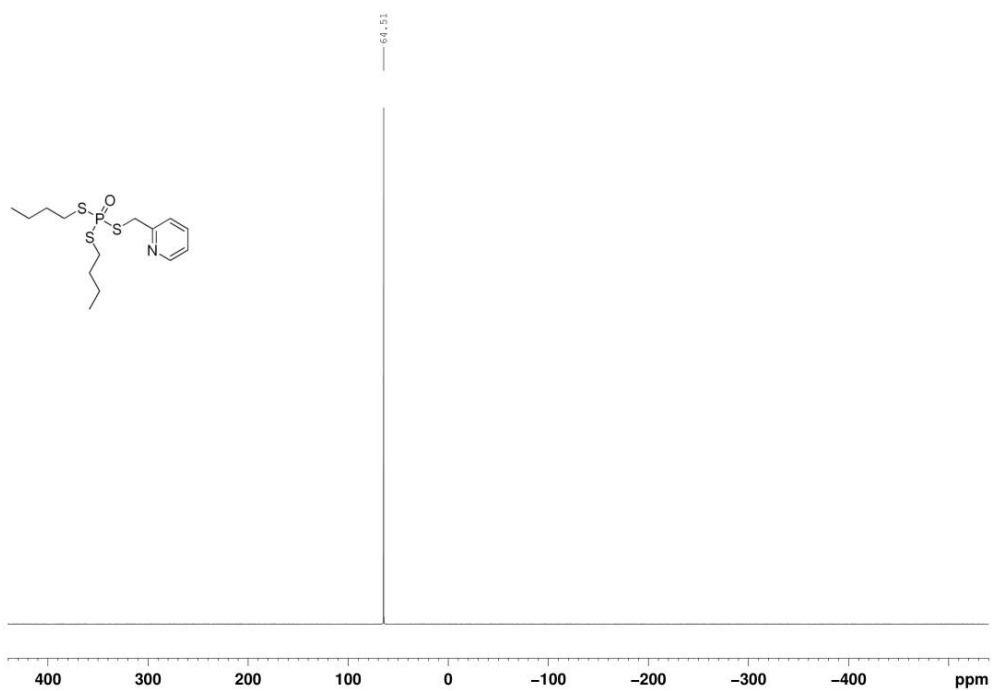

18

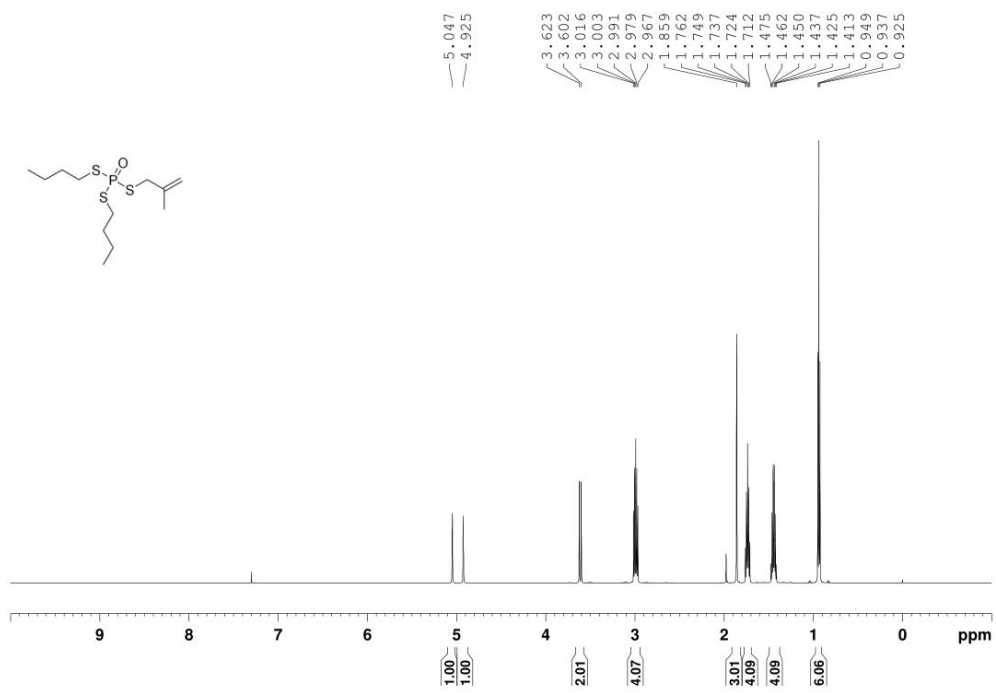

18

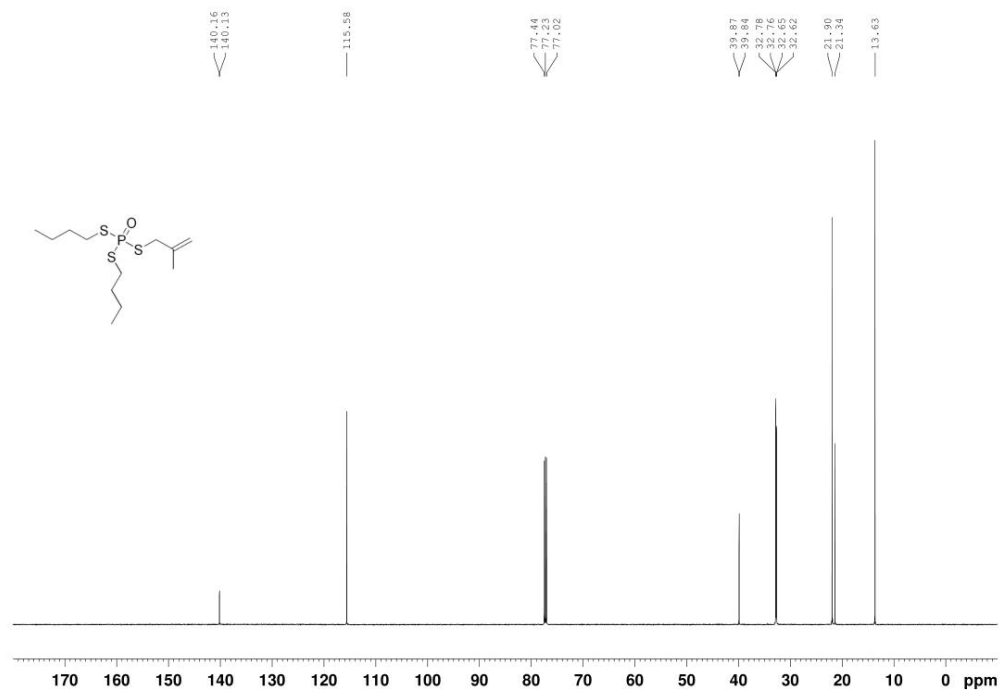

18

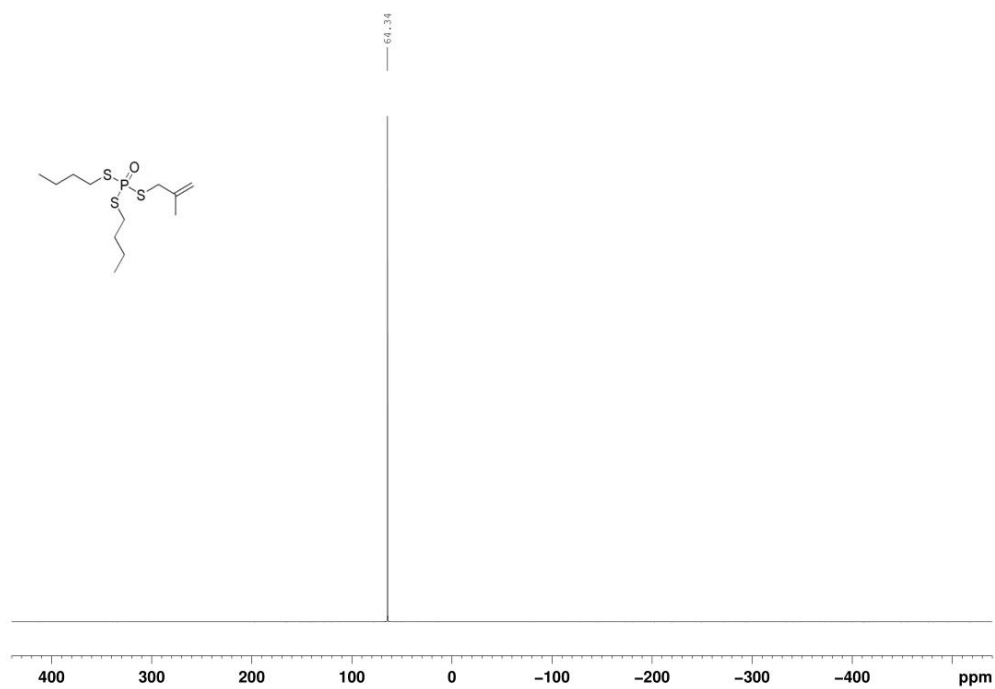

19

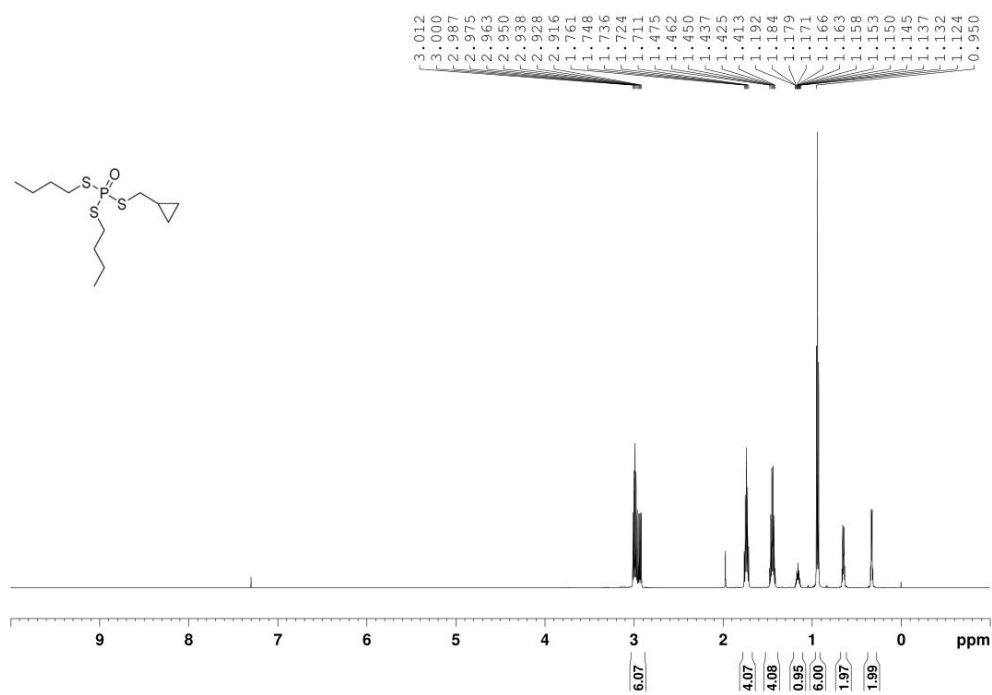

19

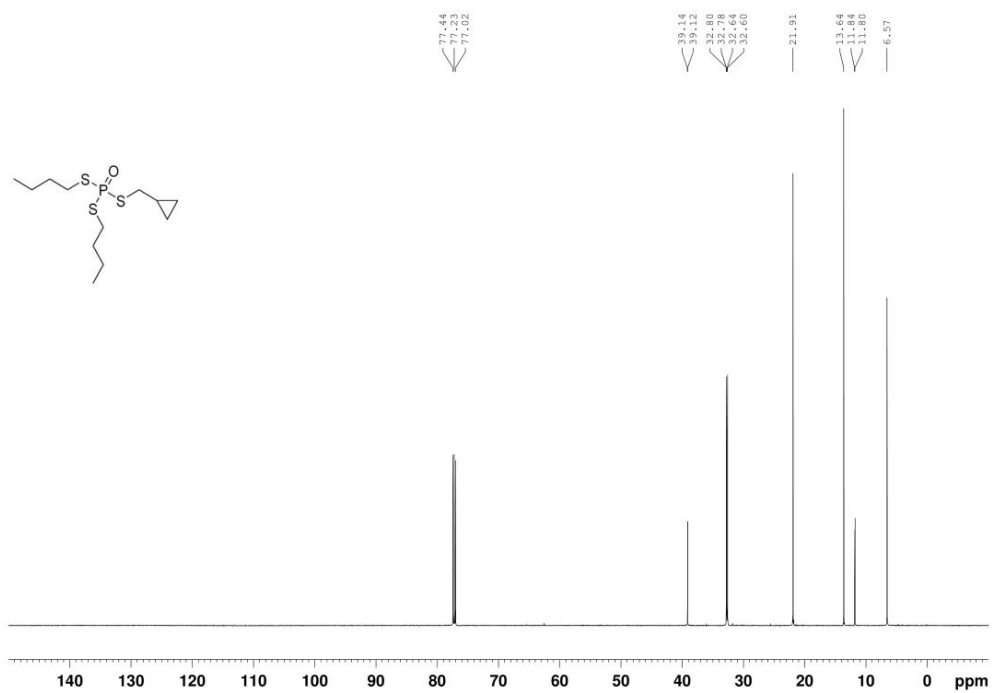

19

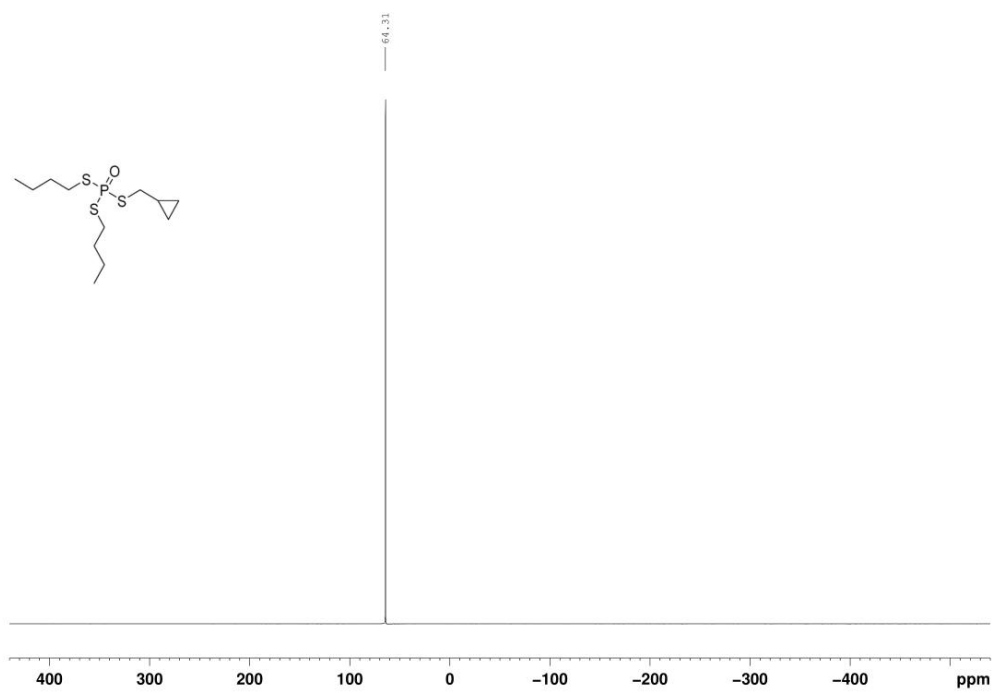



20

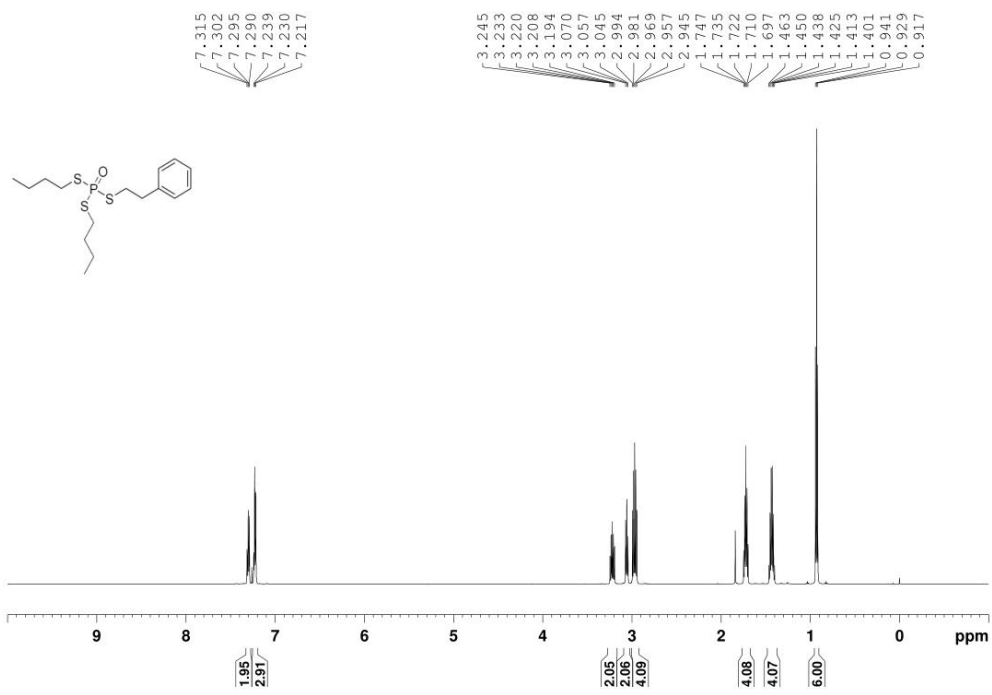

20

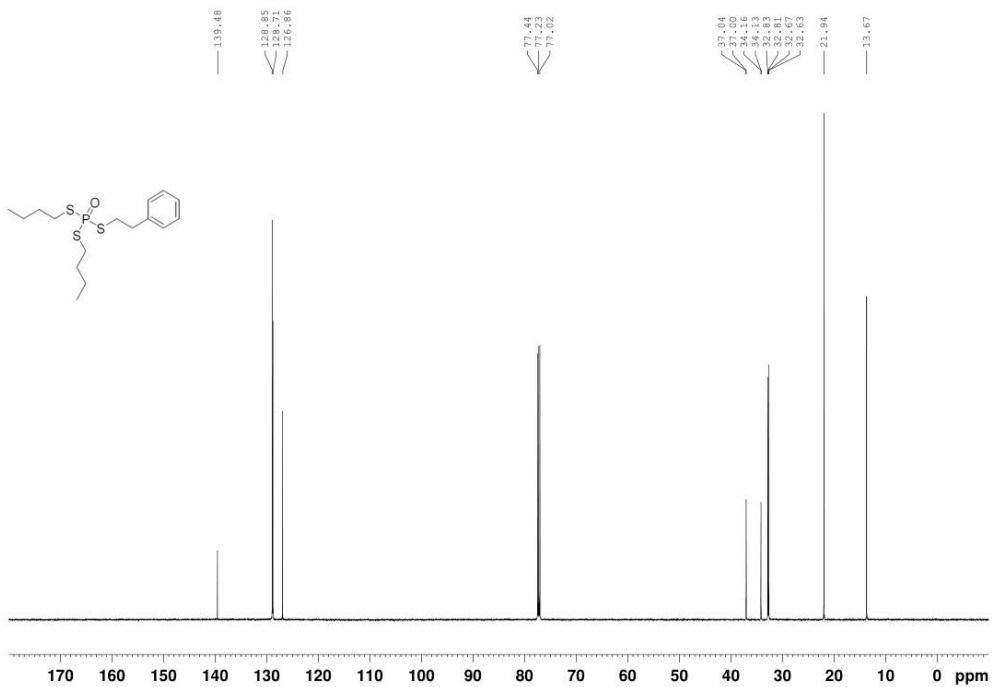

20

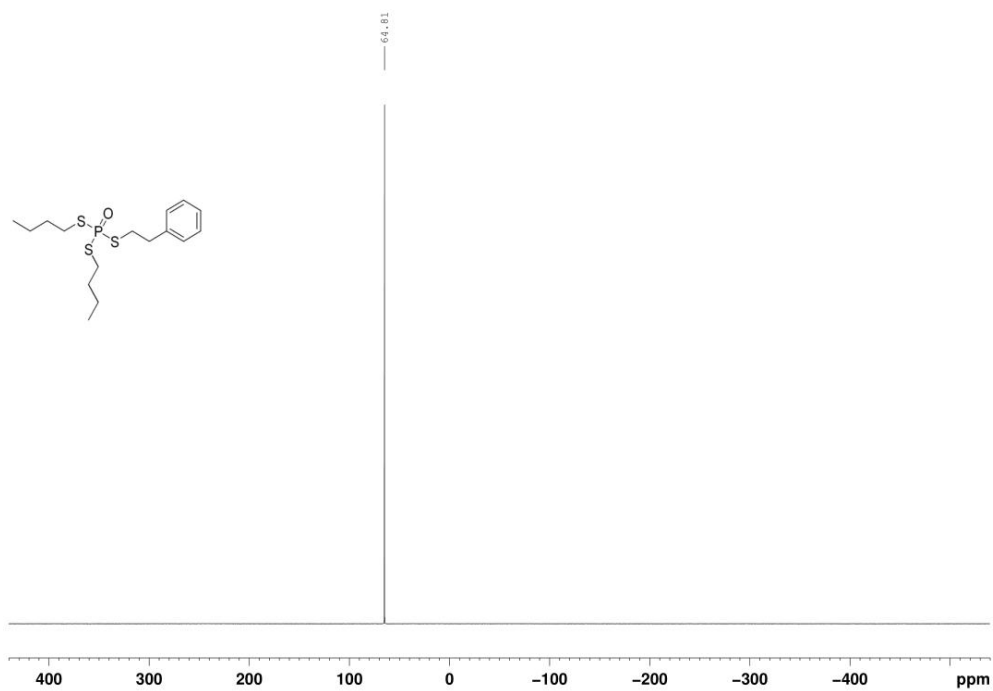

21

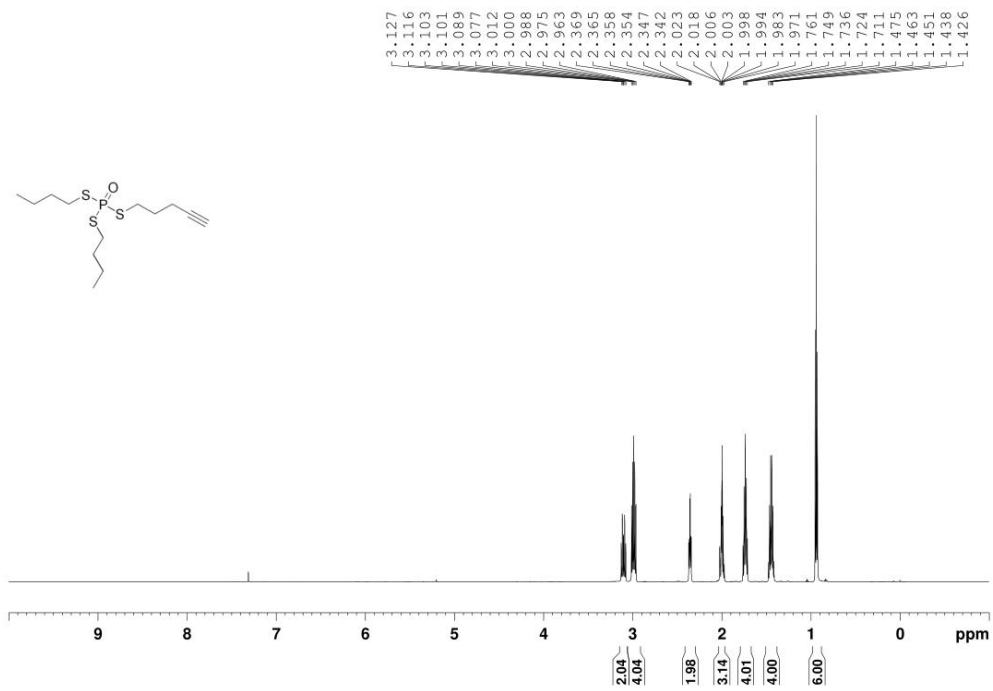

21

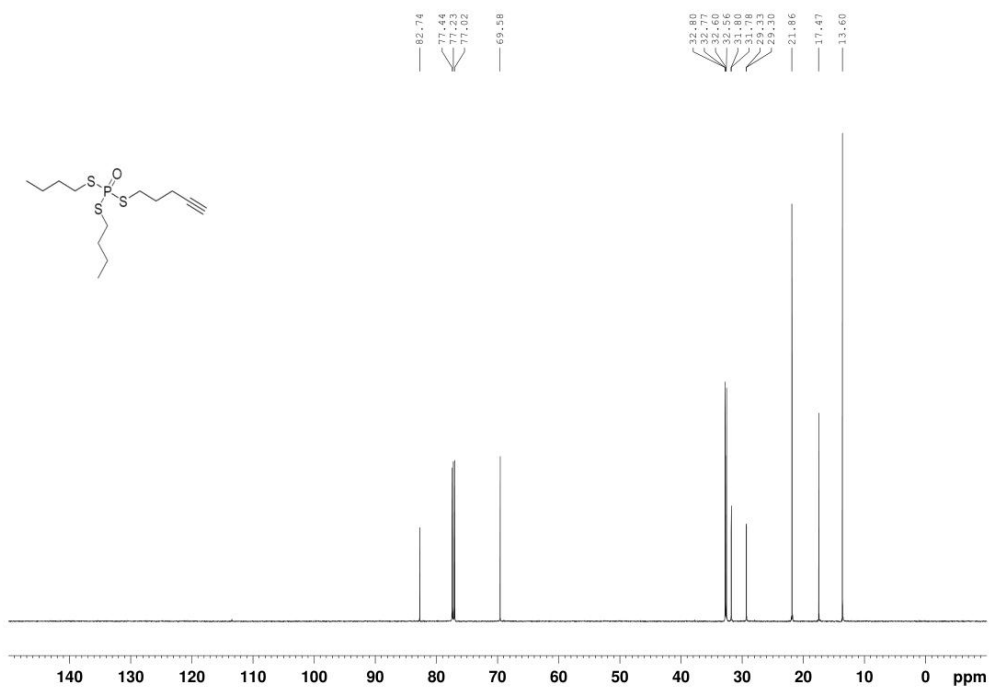

21

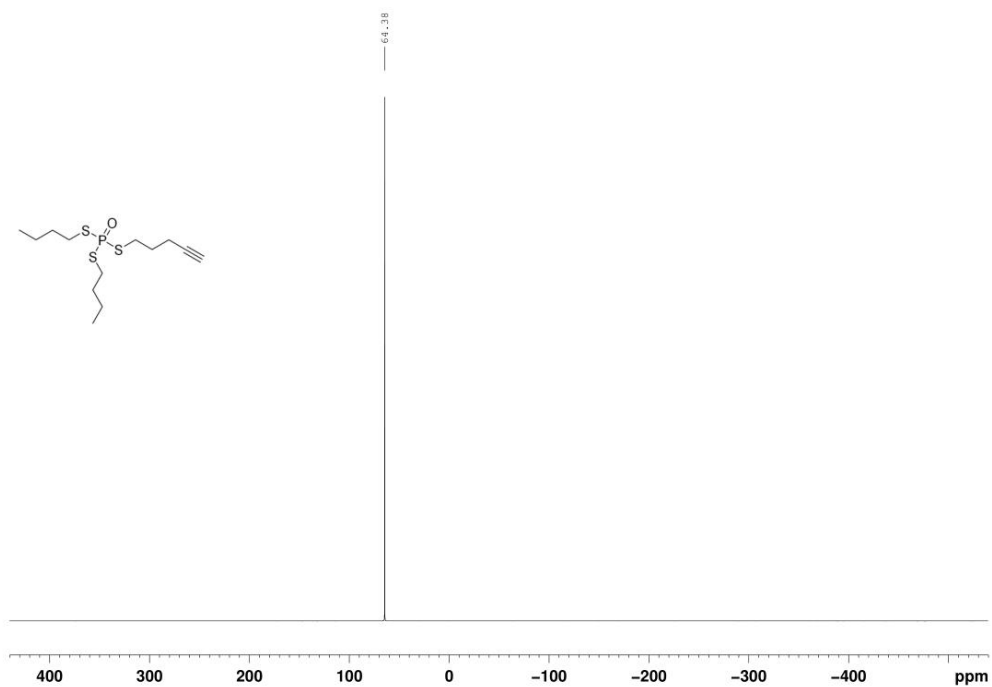

22

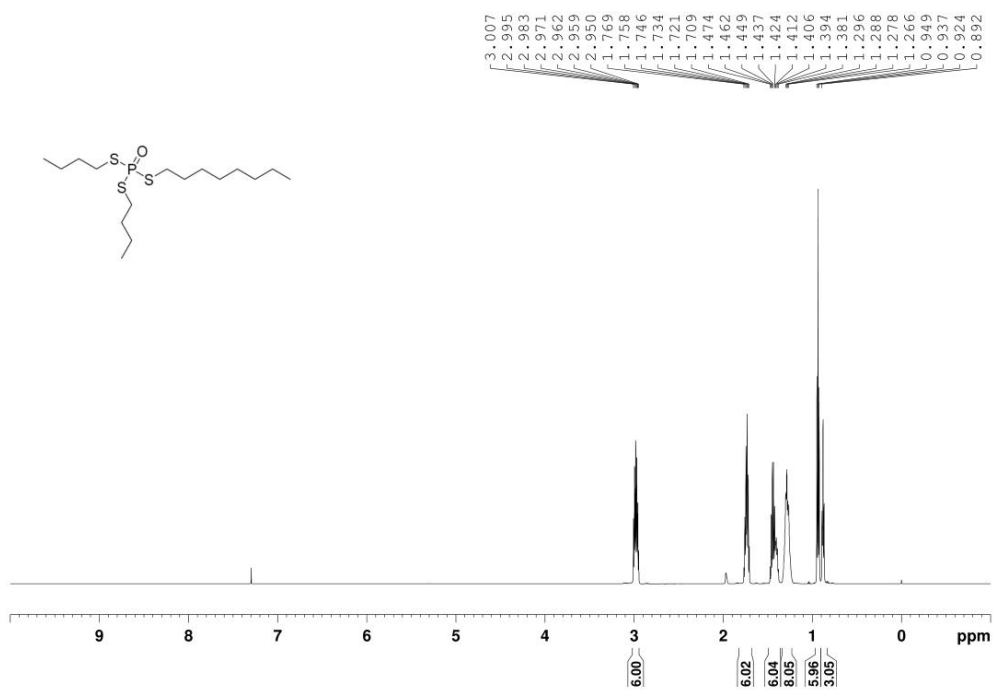

22

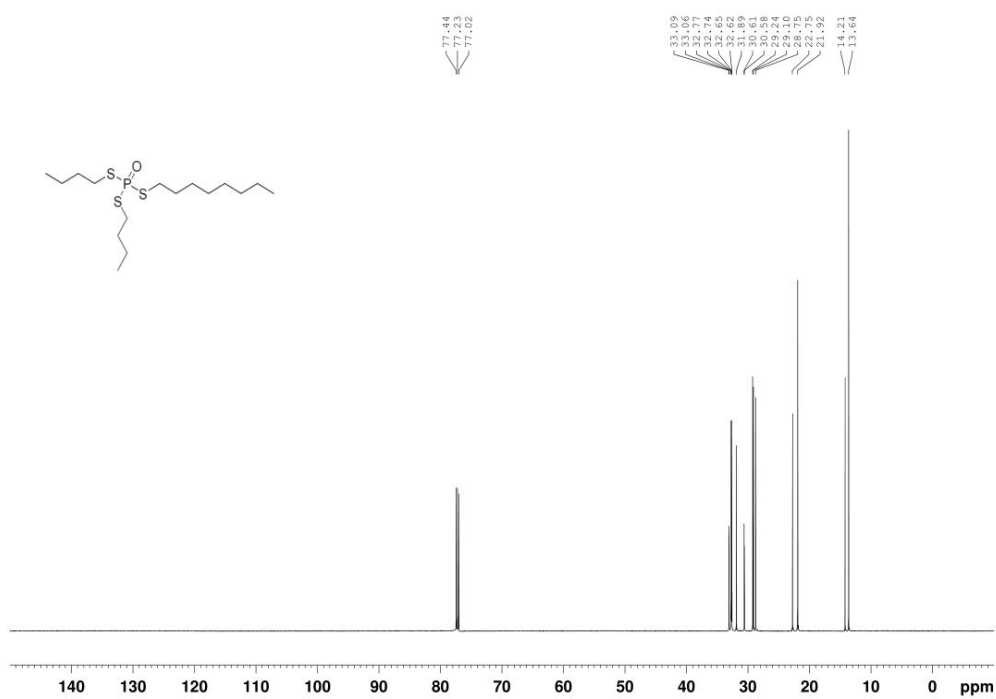

22

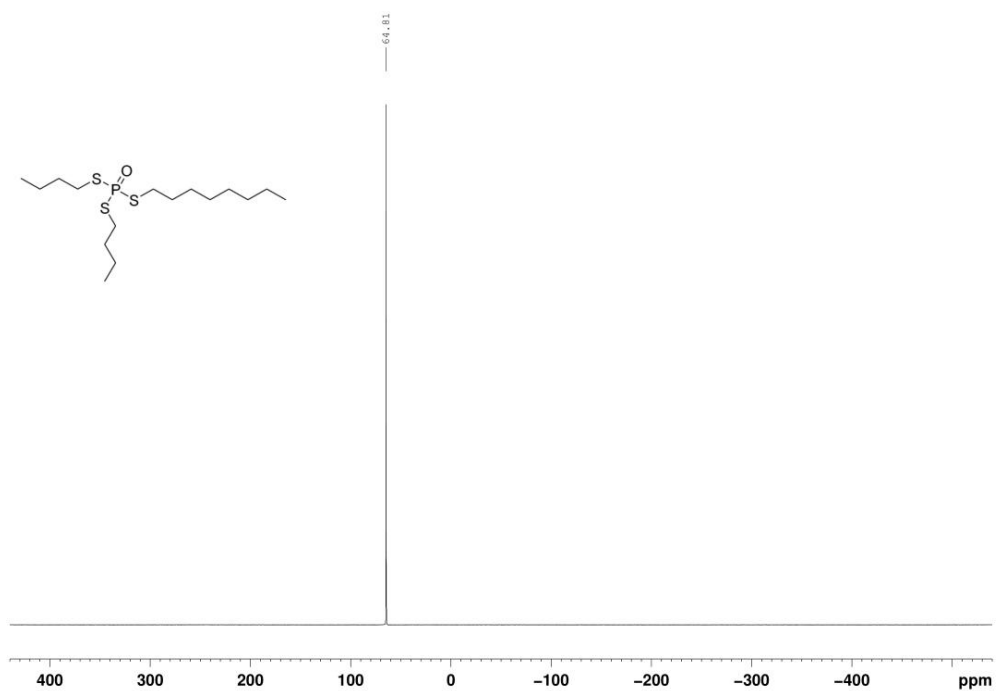

23

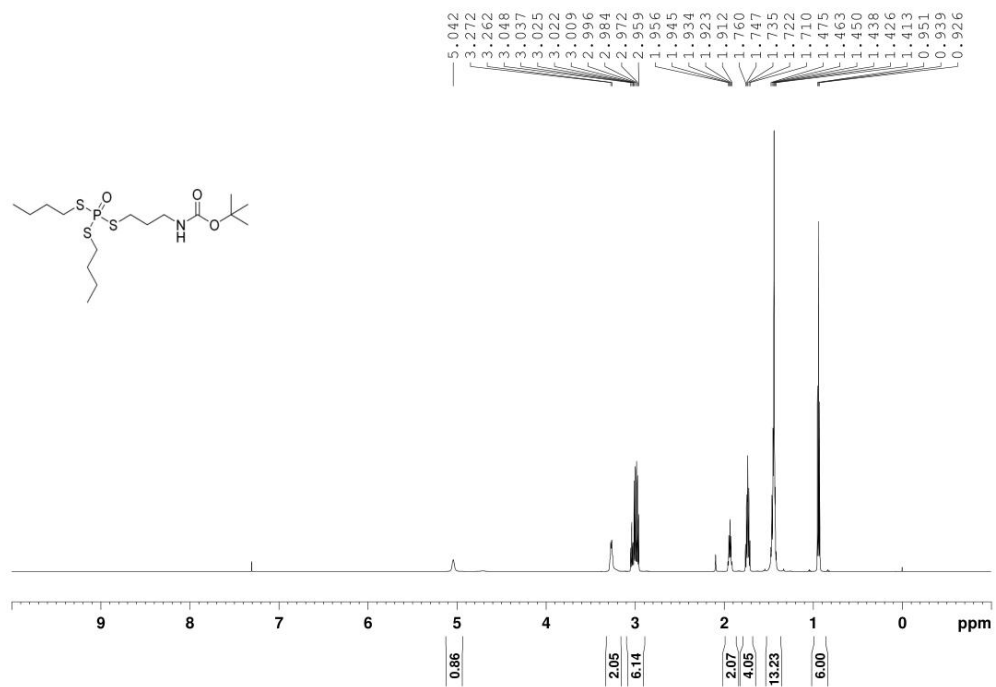

23

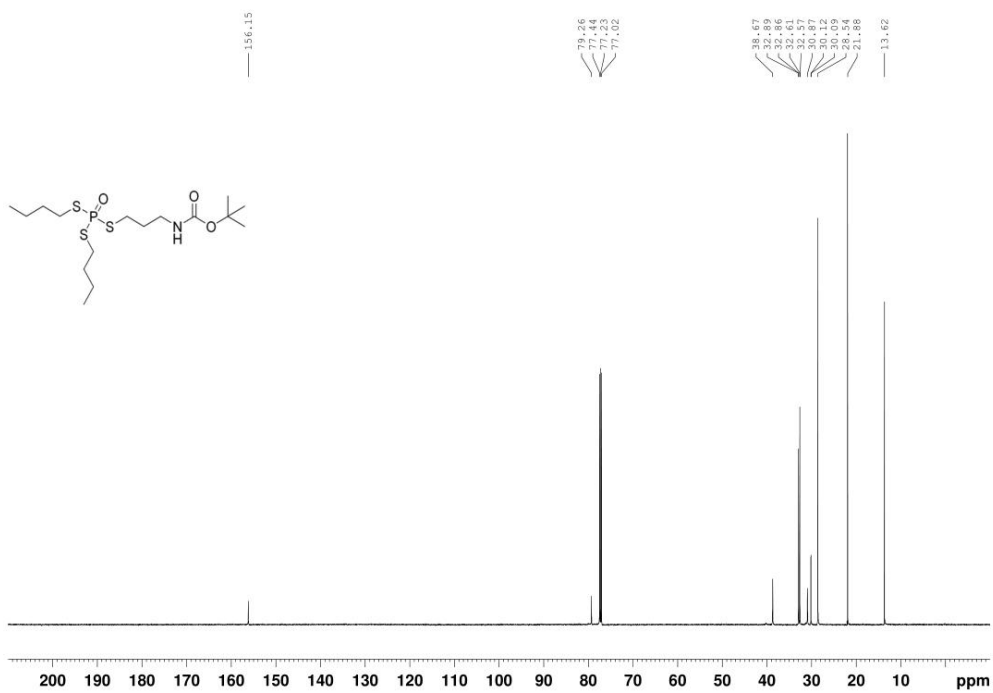

23

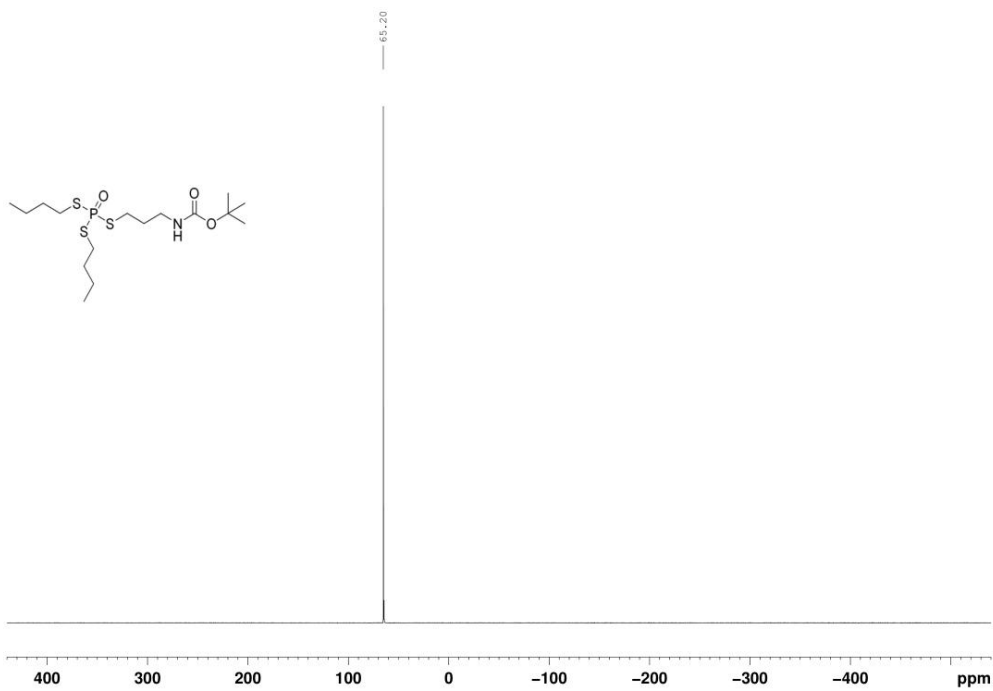

24

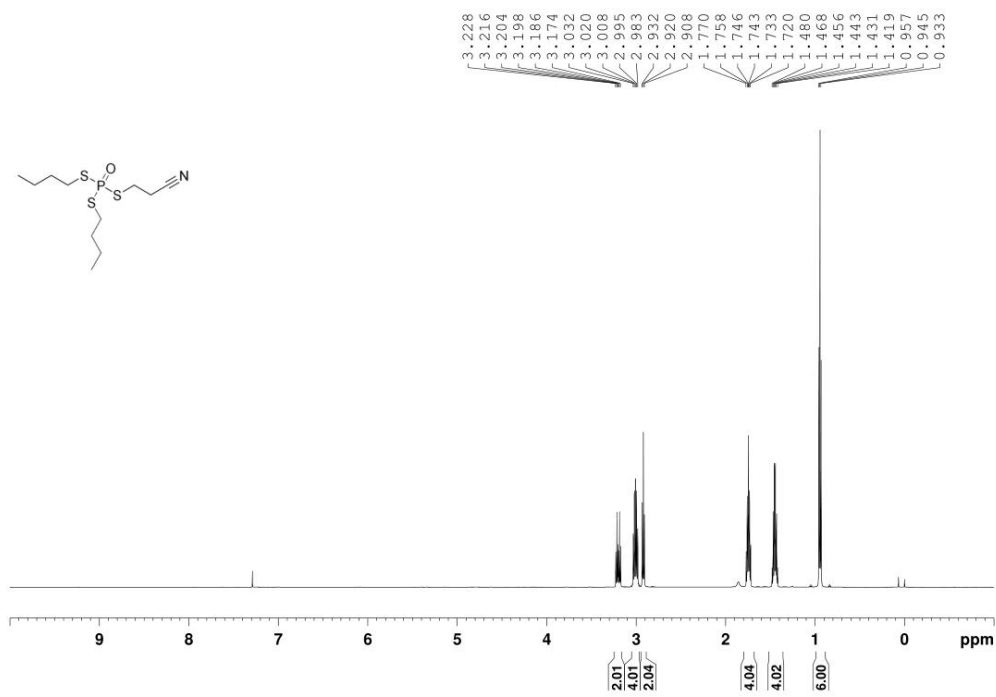

24

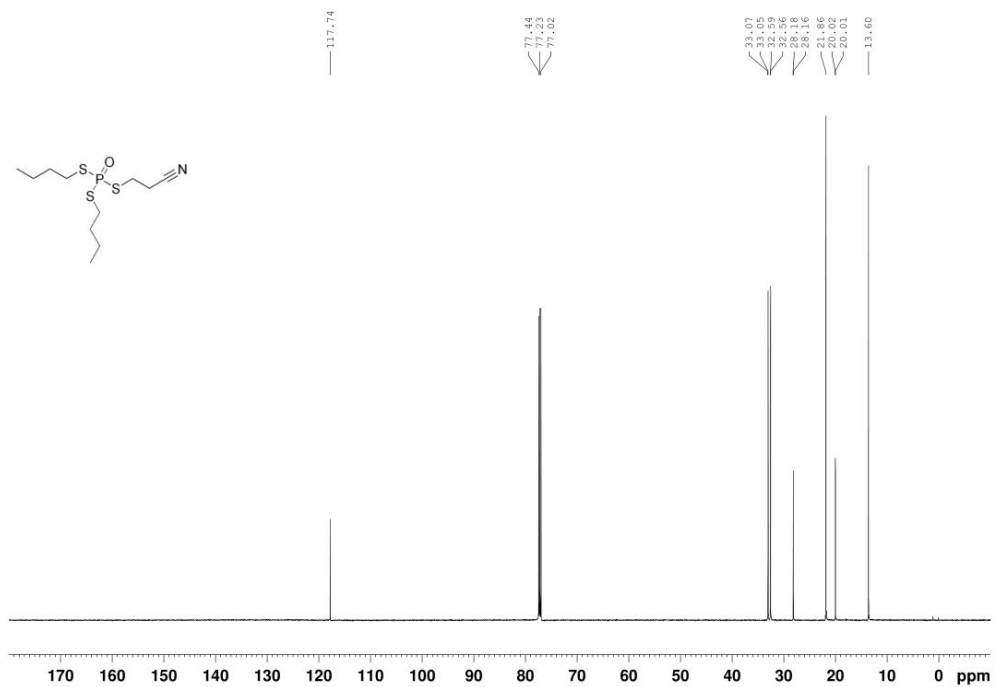

24

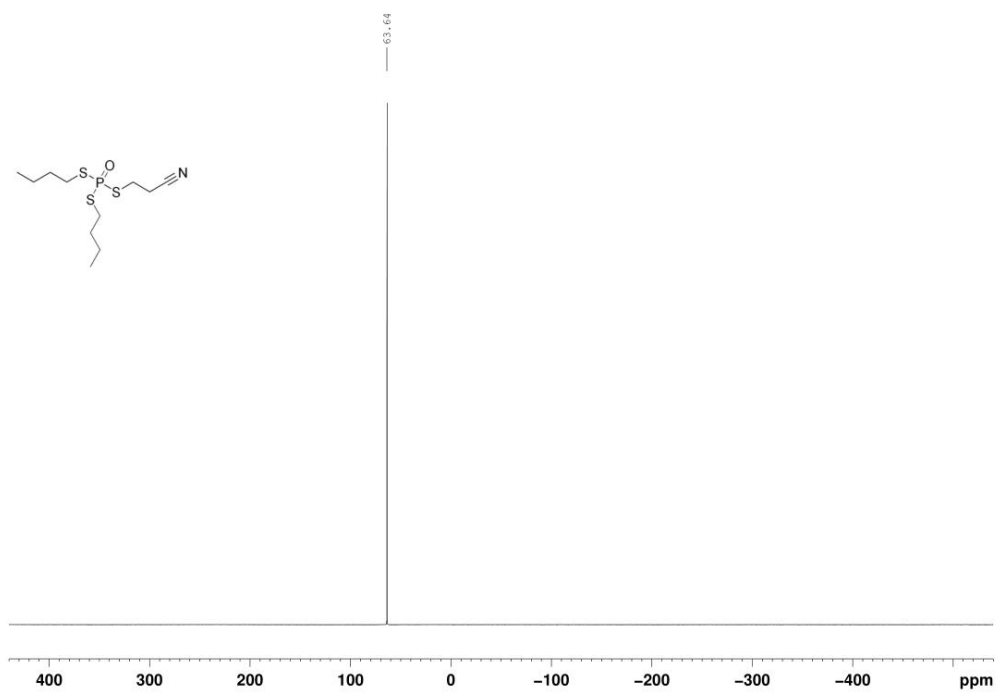

25

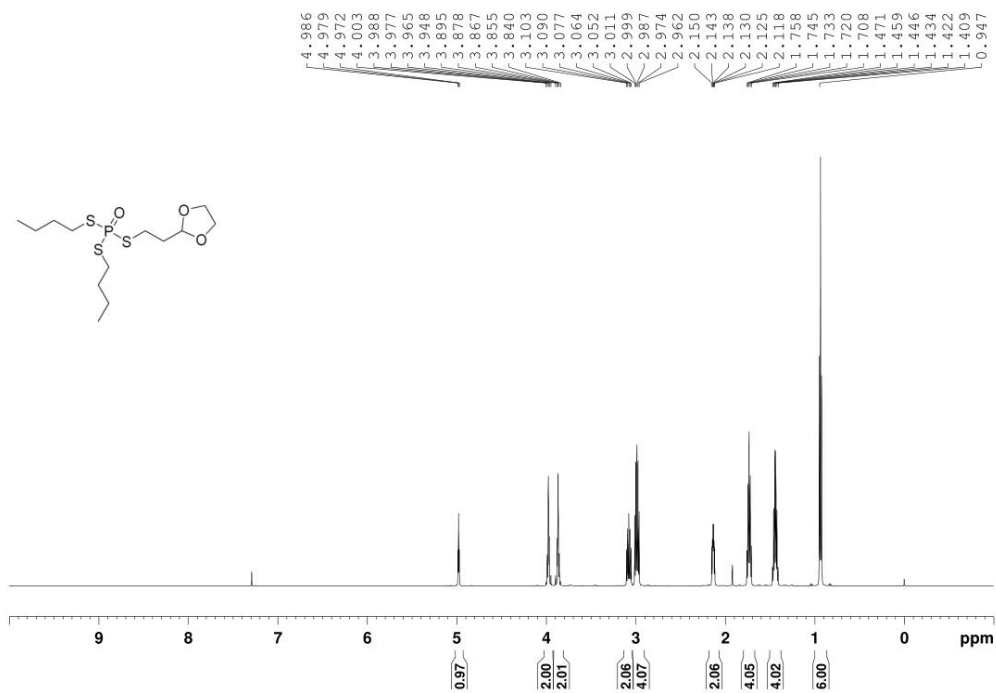



25

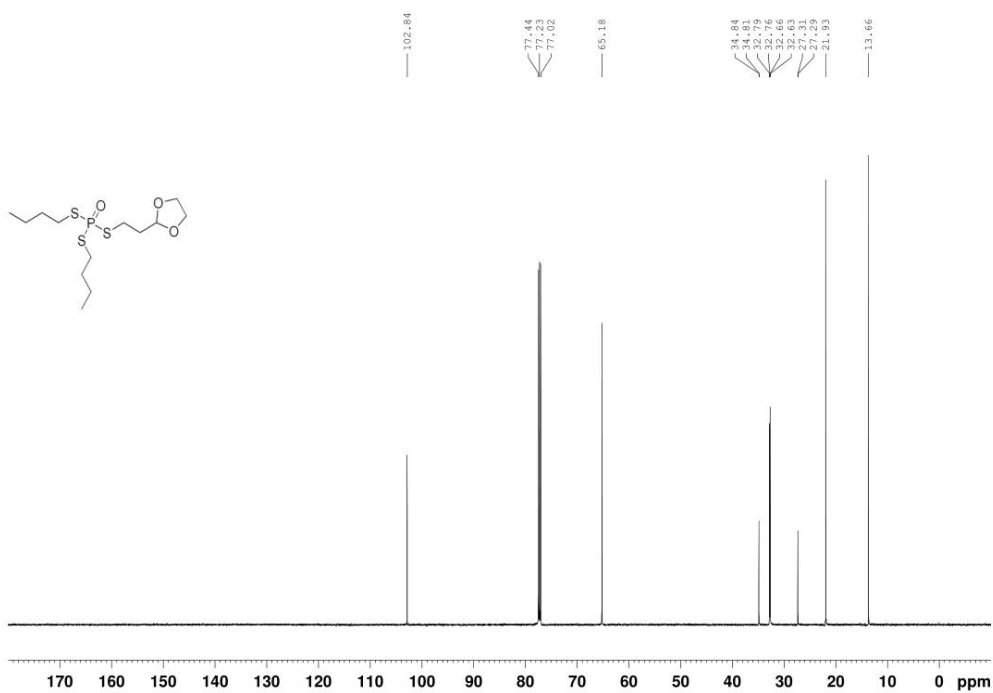

25

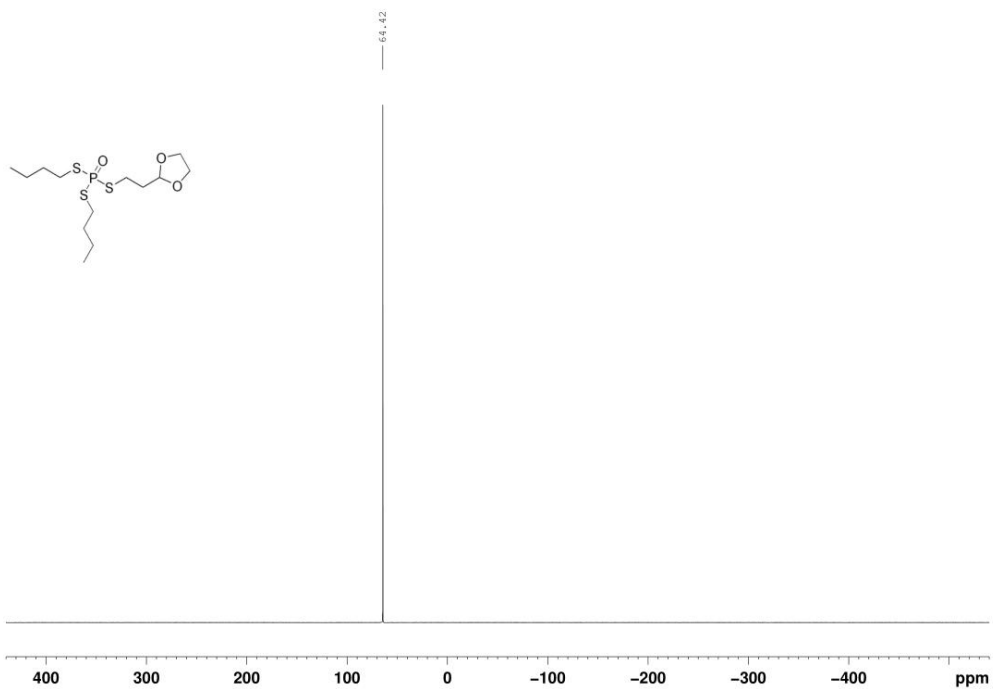

26

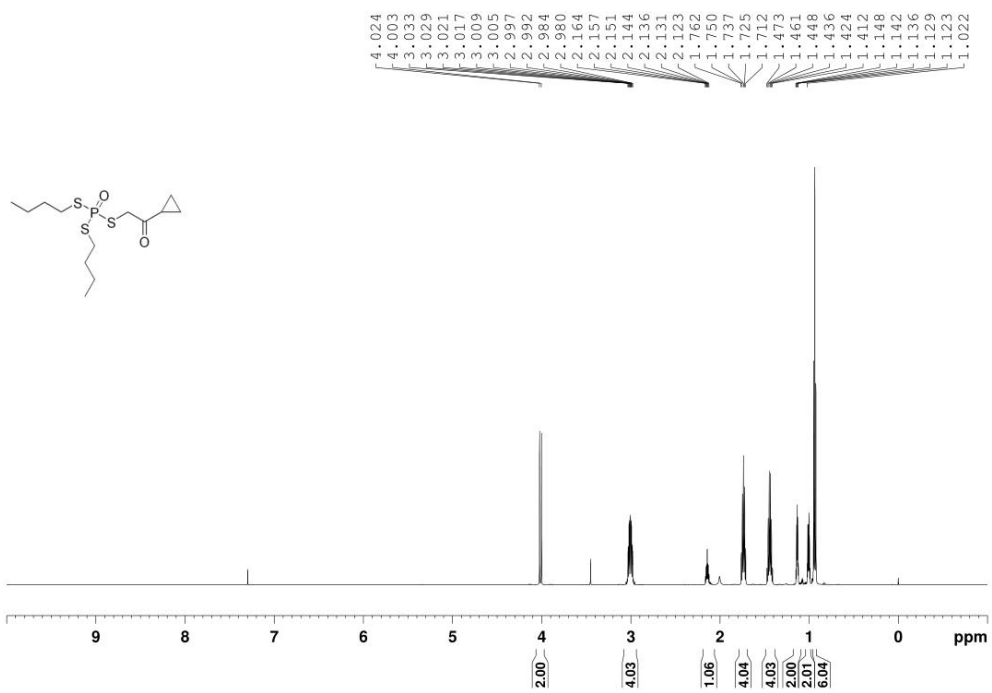

26

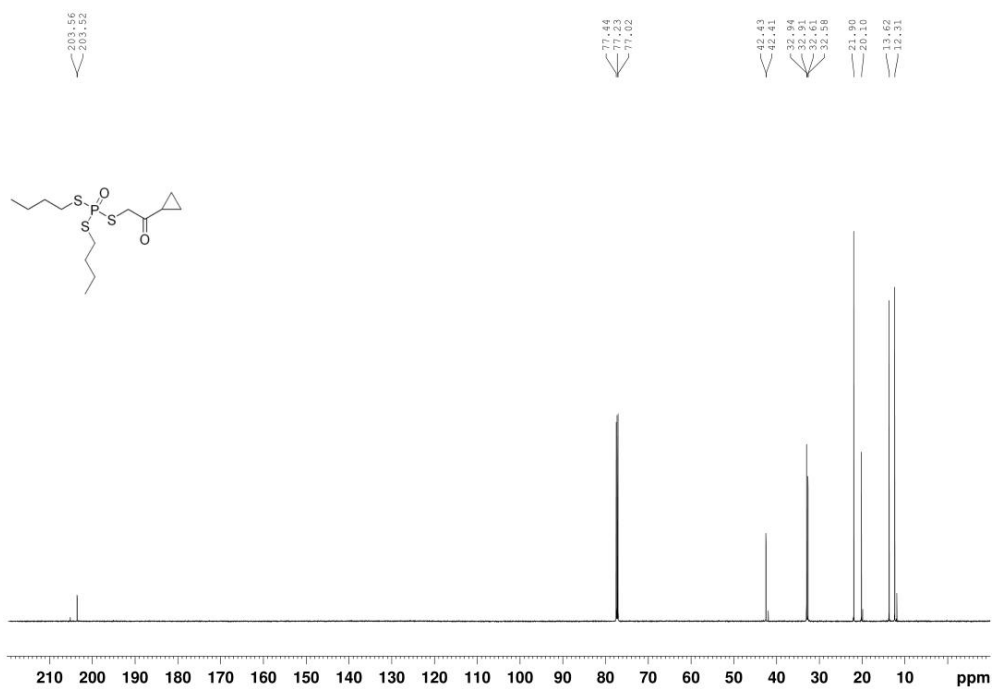

26

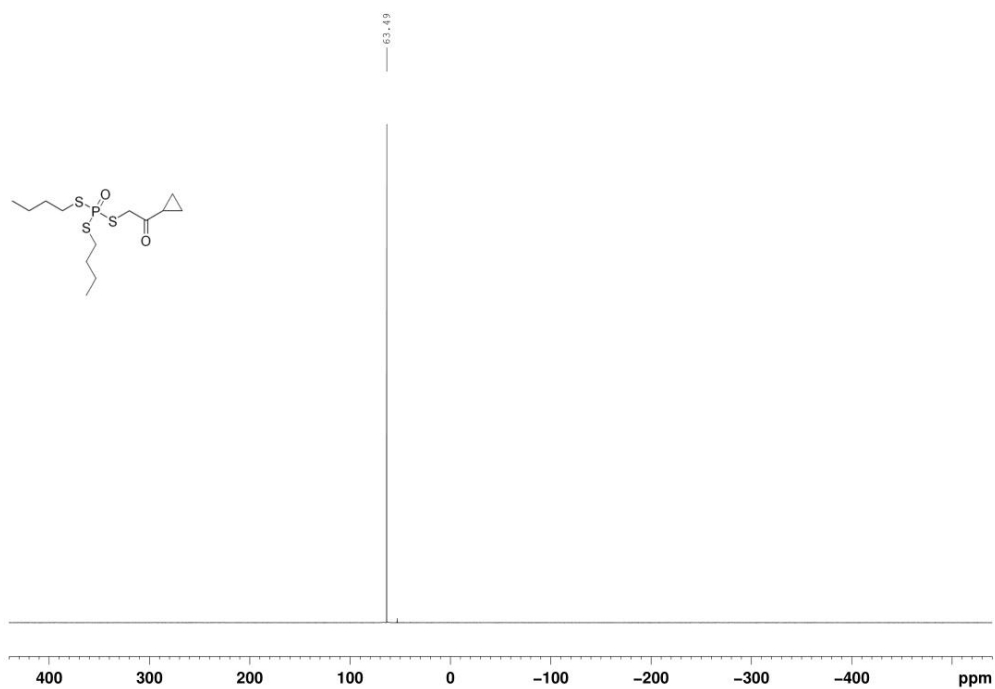

27

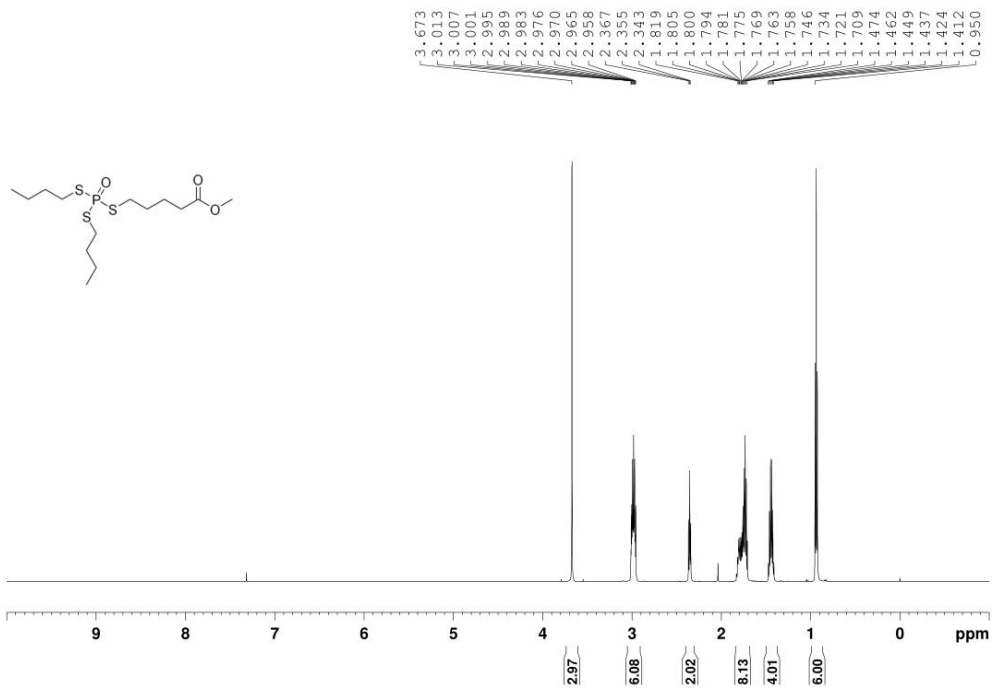

27

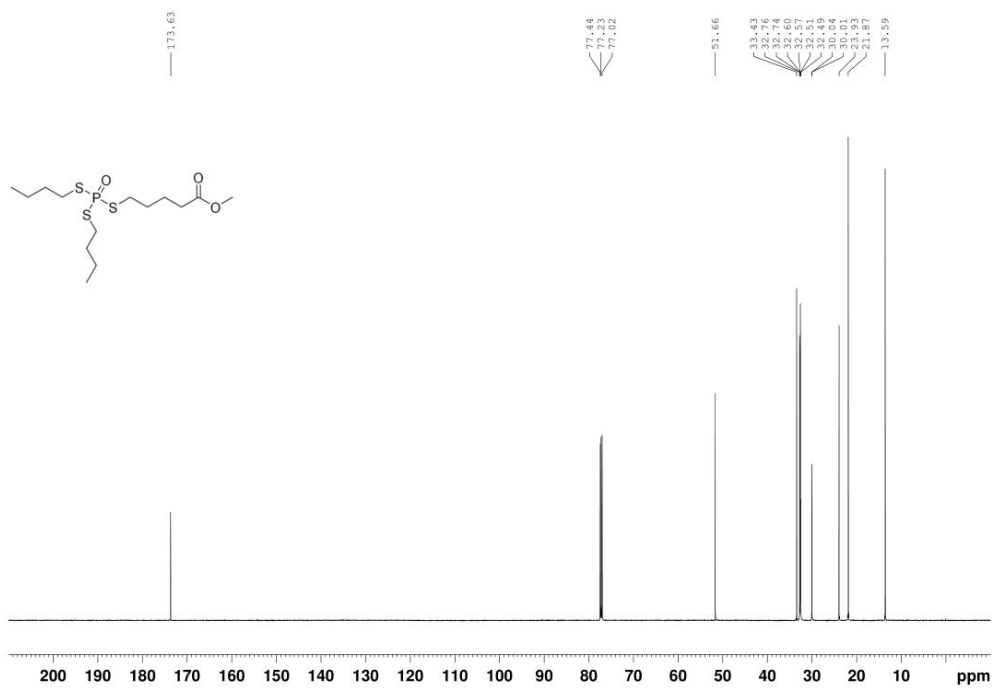

27

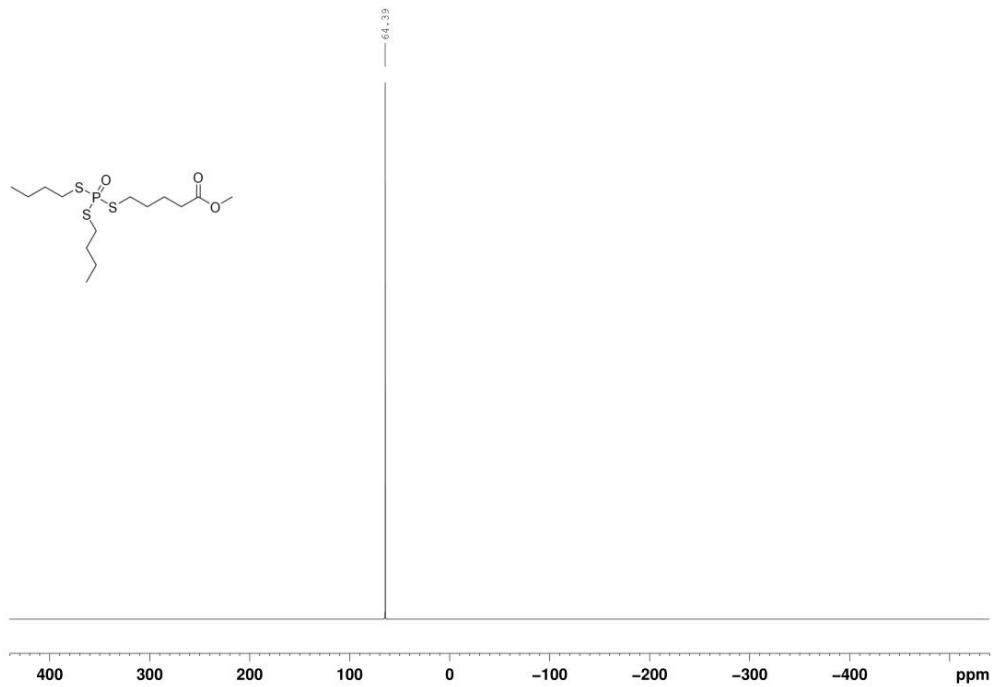

28

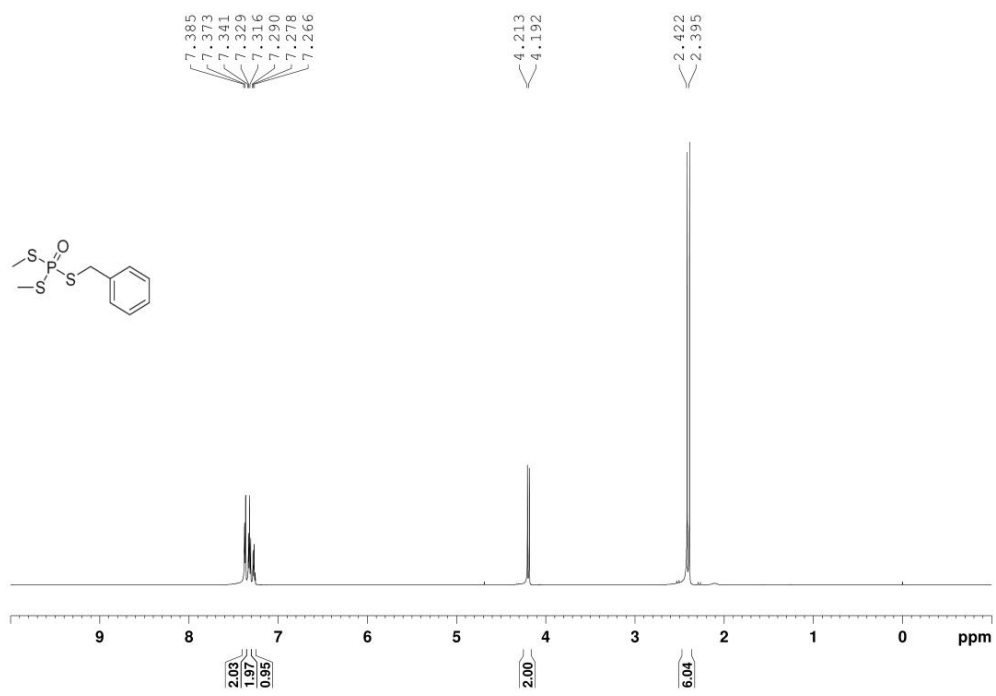

28

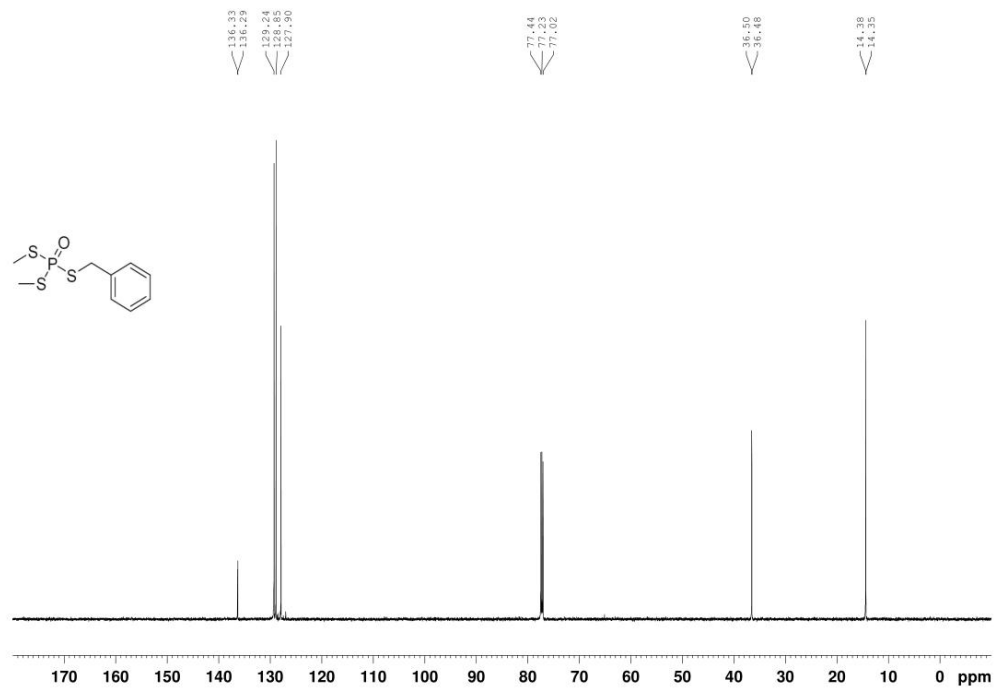

28

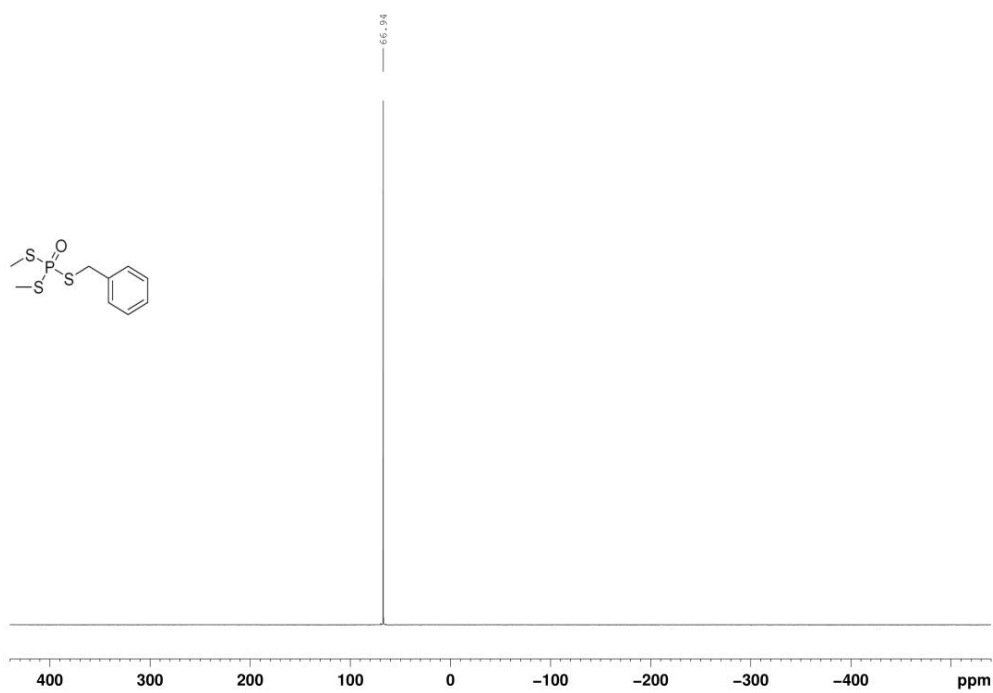

29

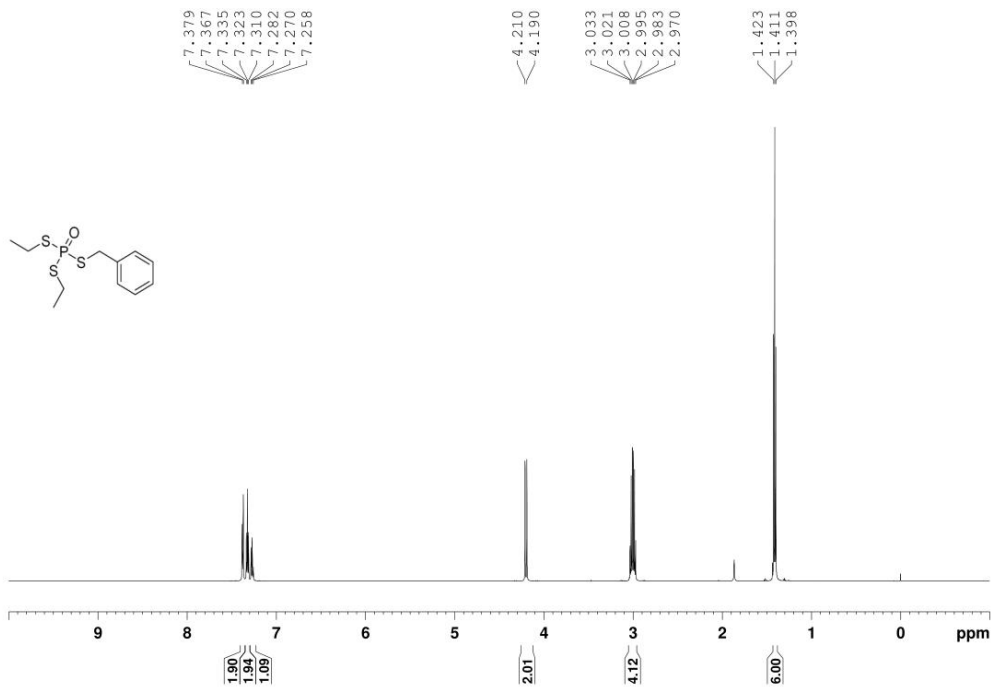

29

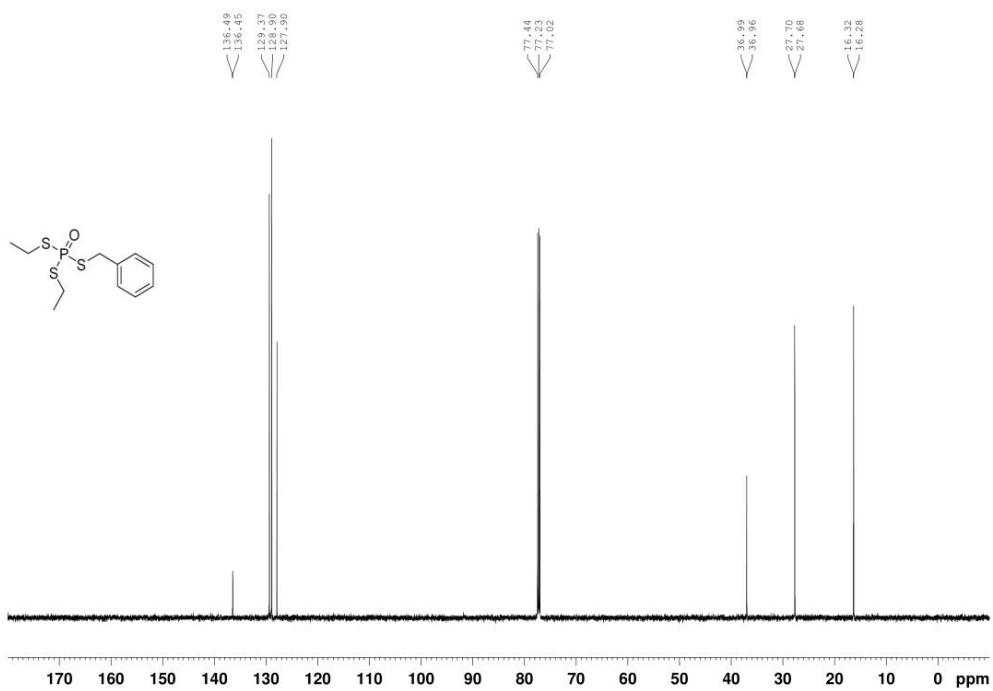

29

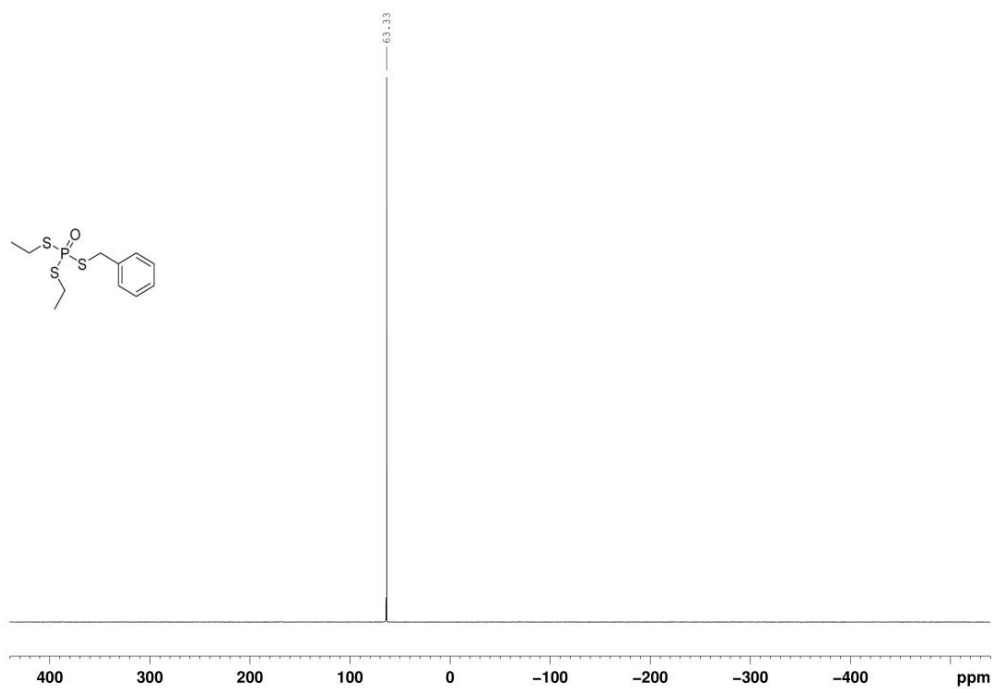

30

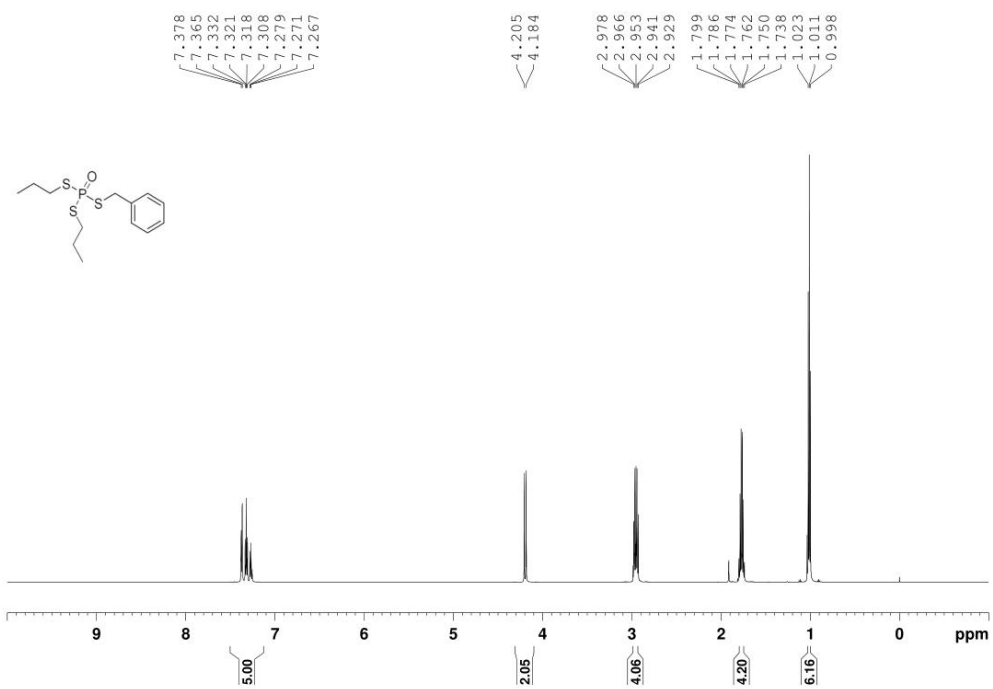

30

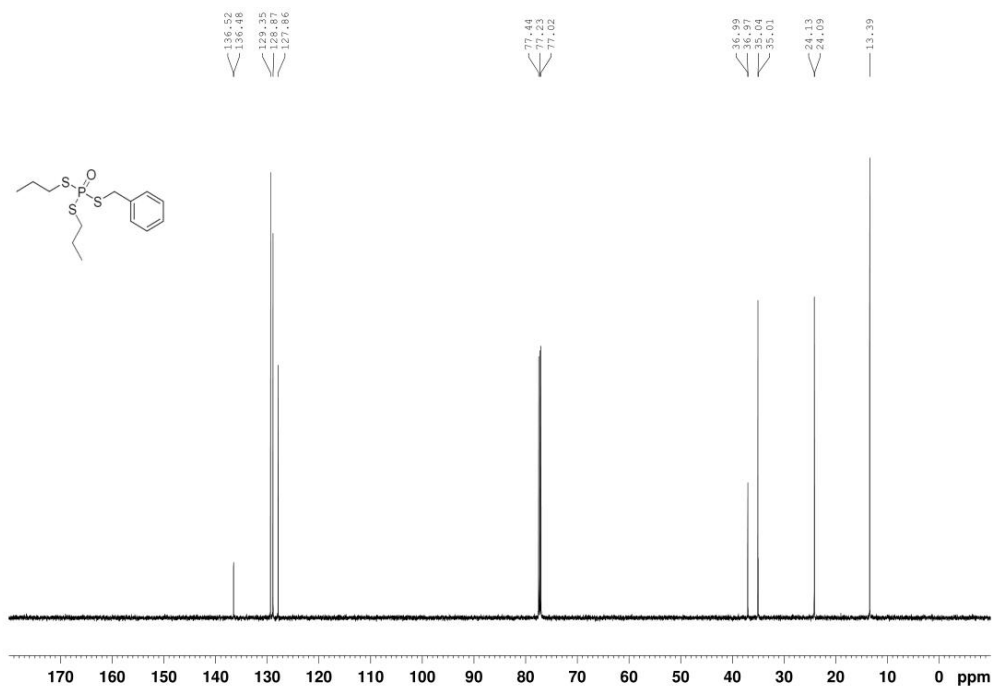



30

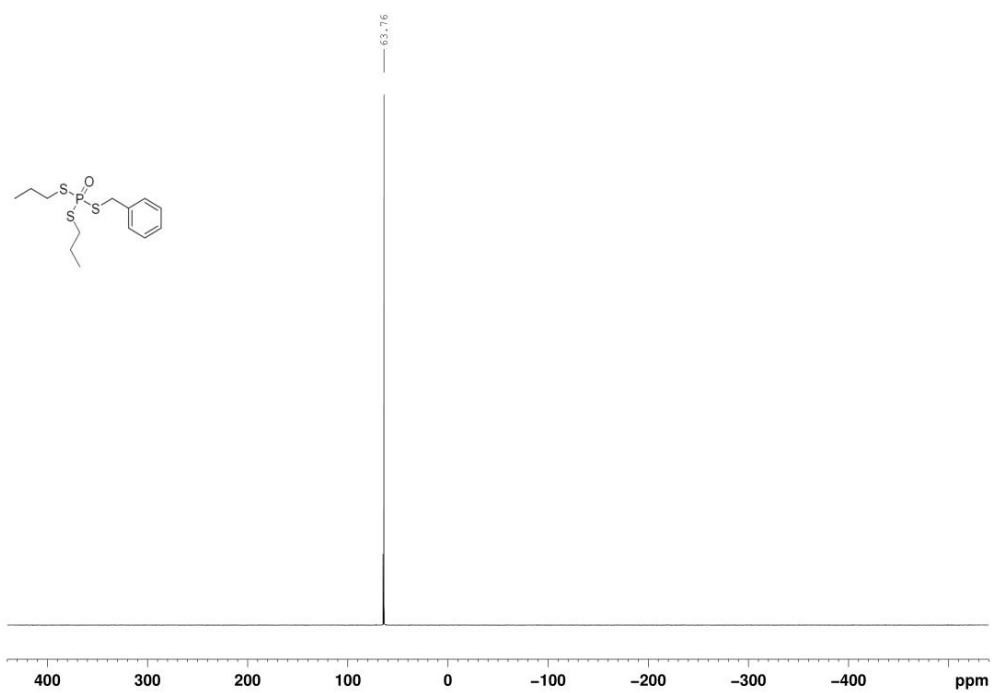

31

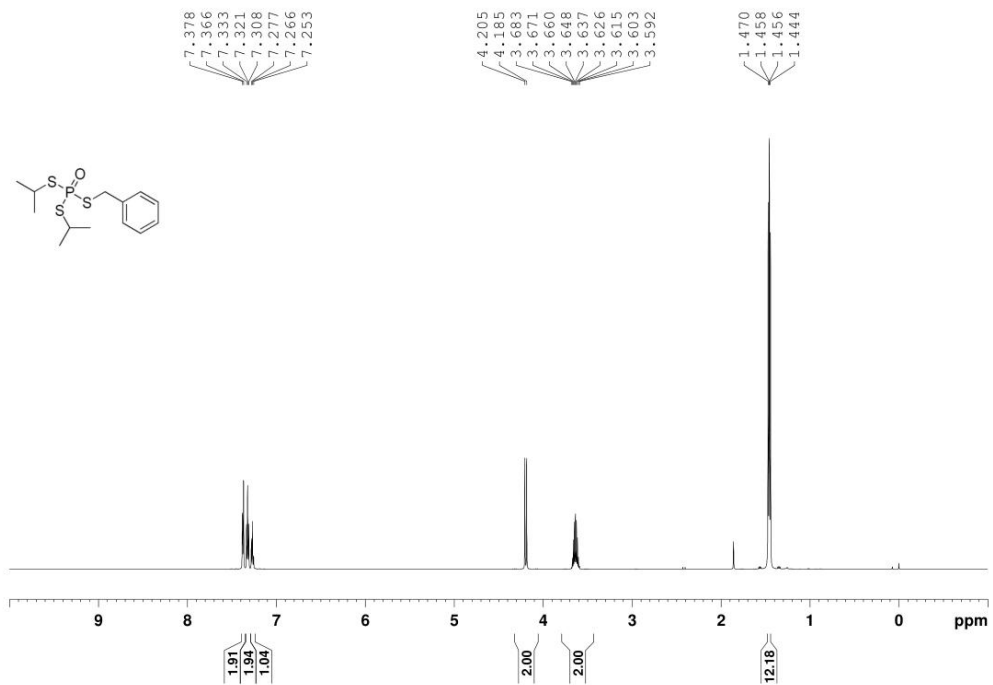

31

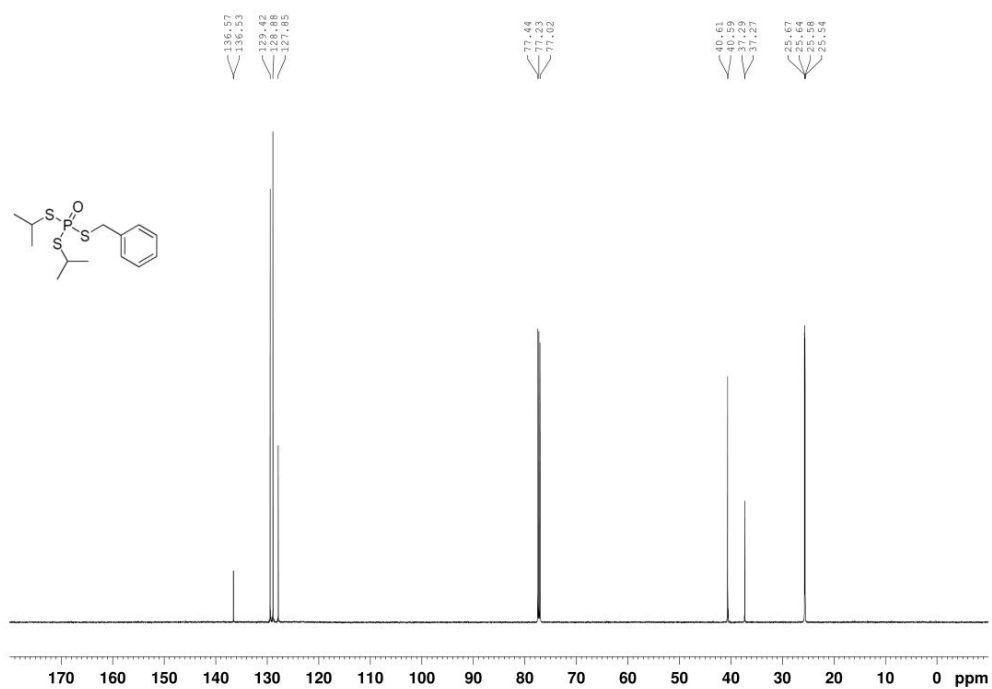

31

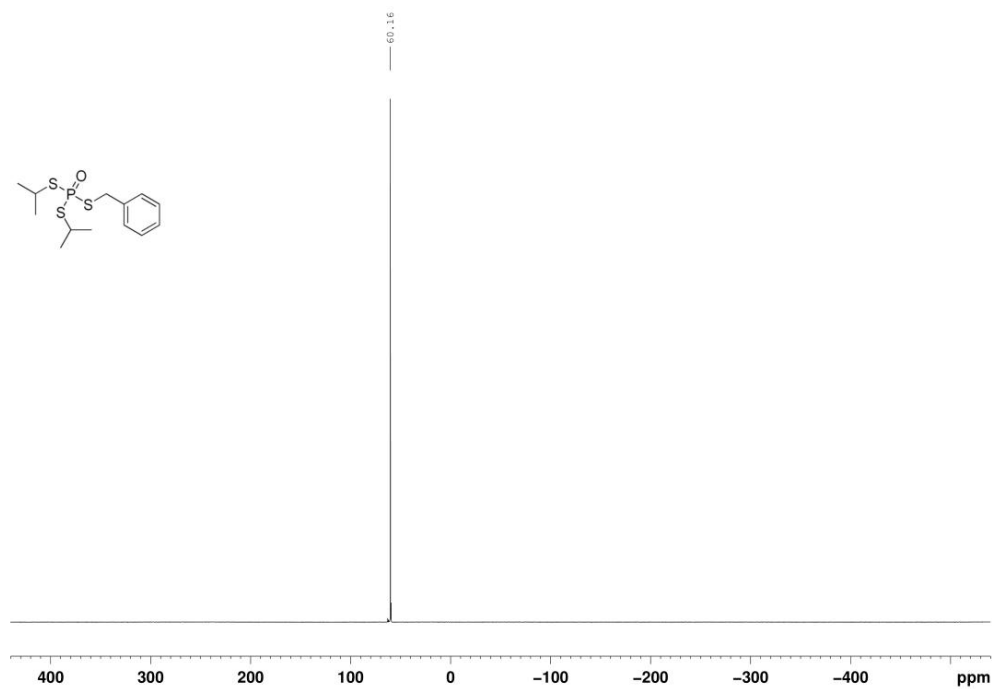

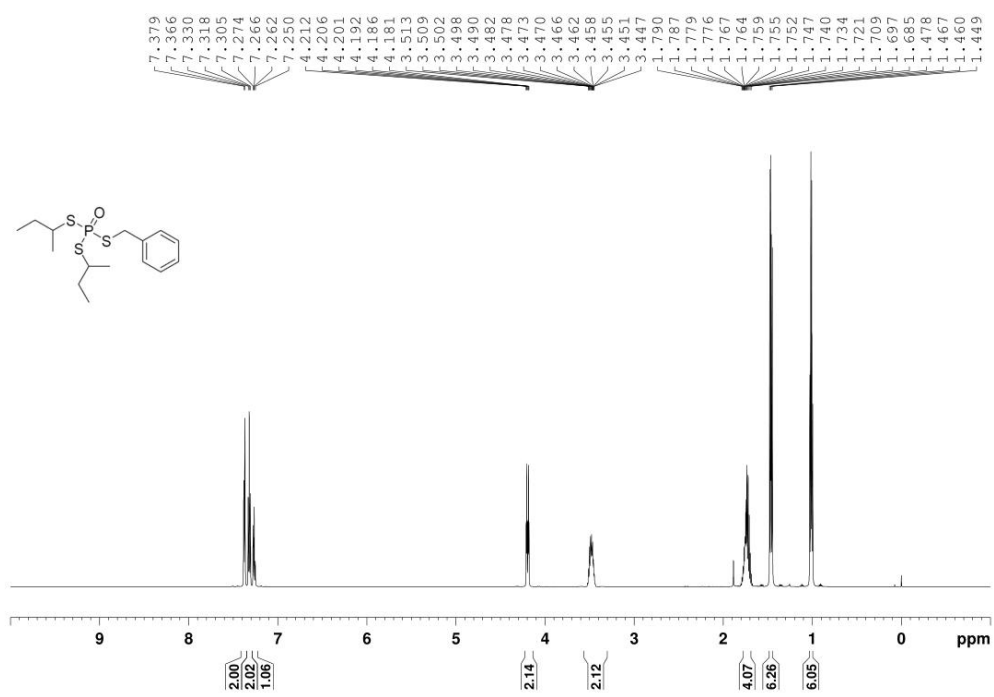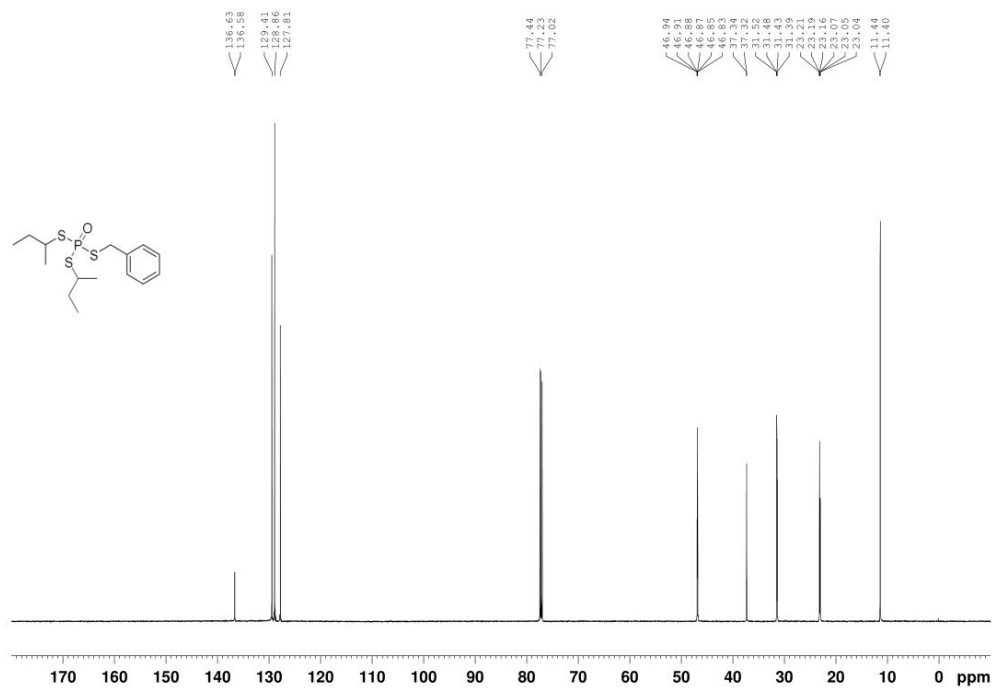

32

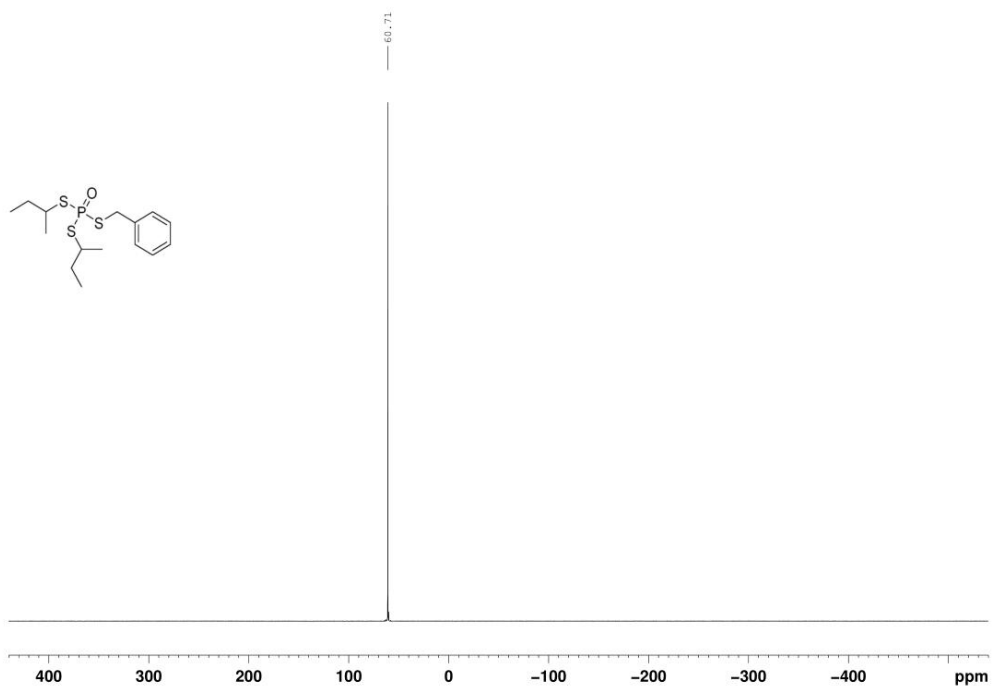

33

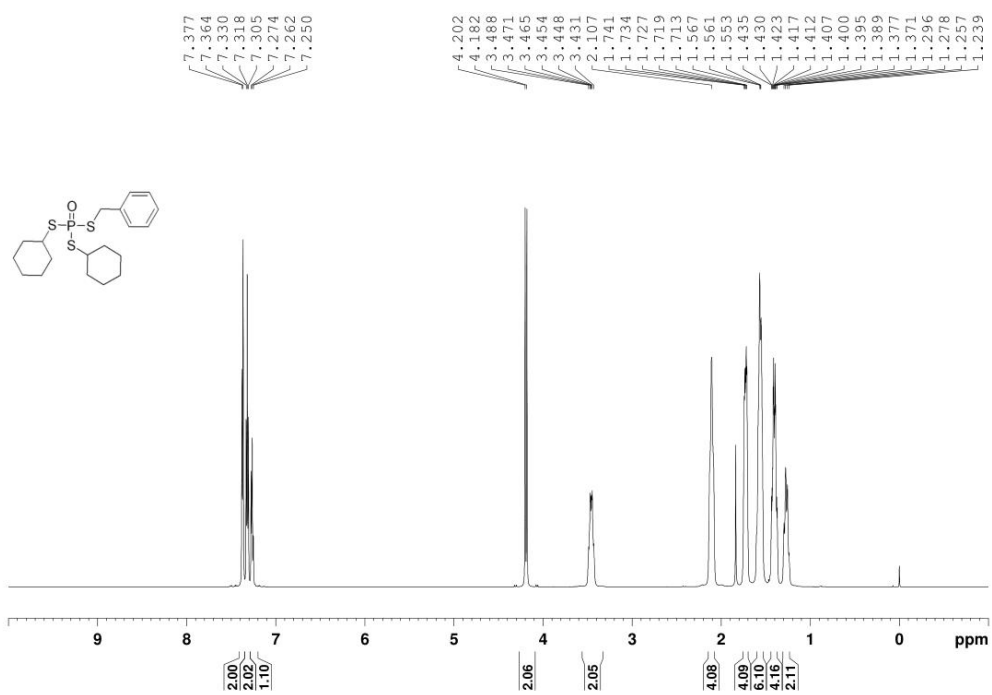

33

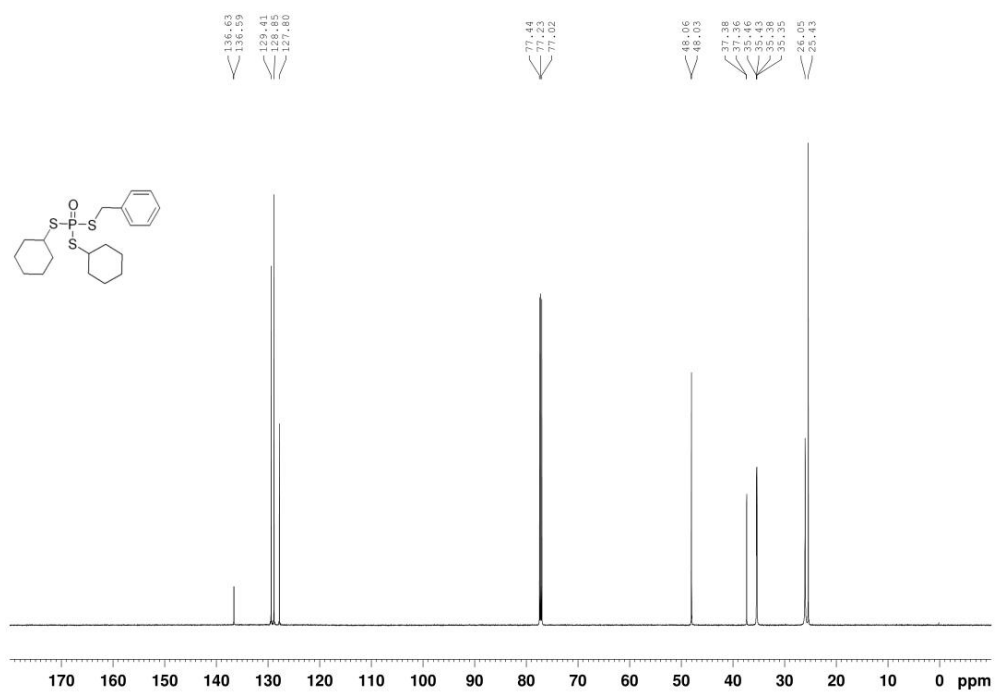

33

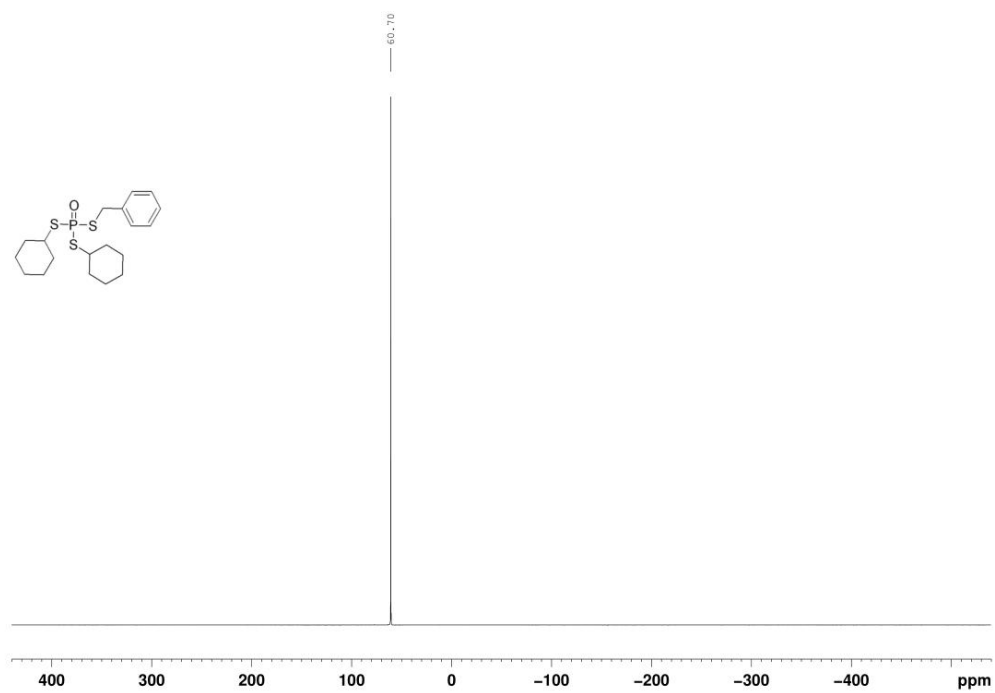

34

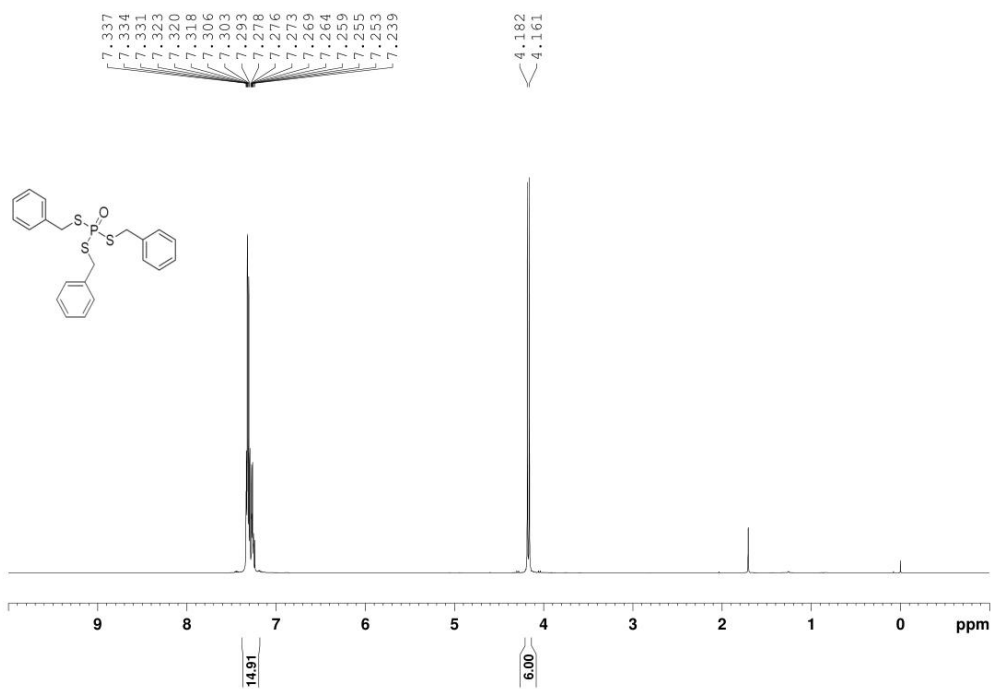

34

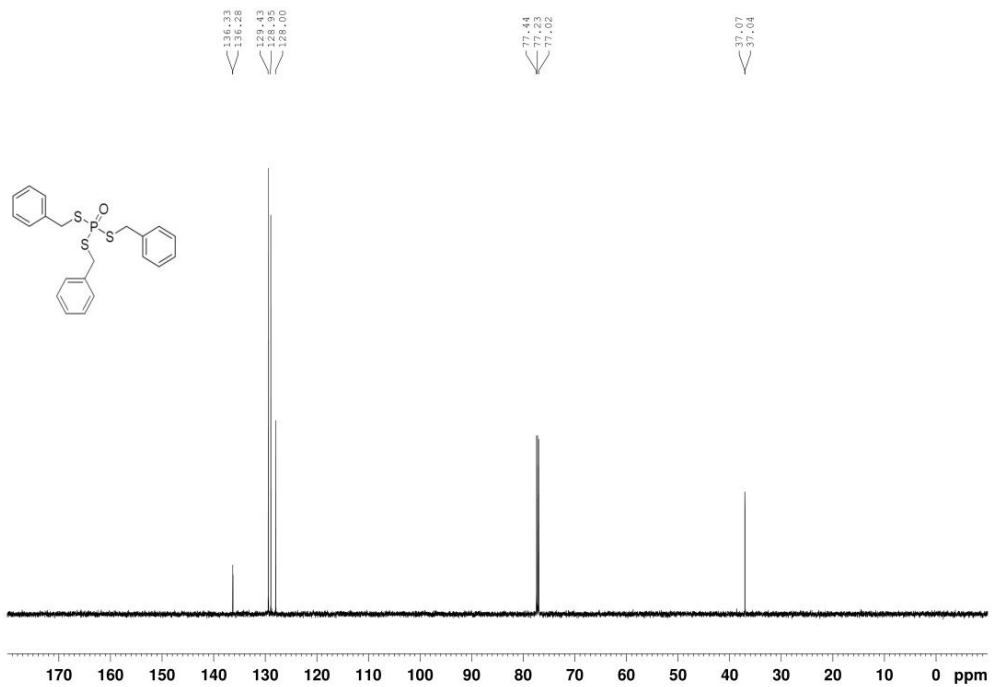

34

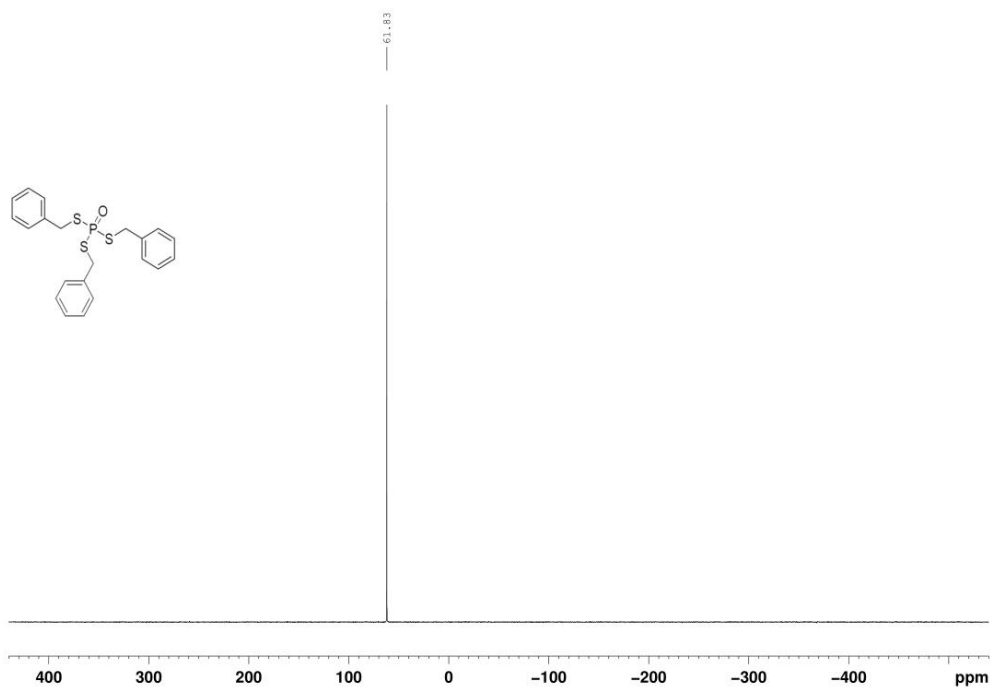

35

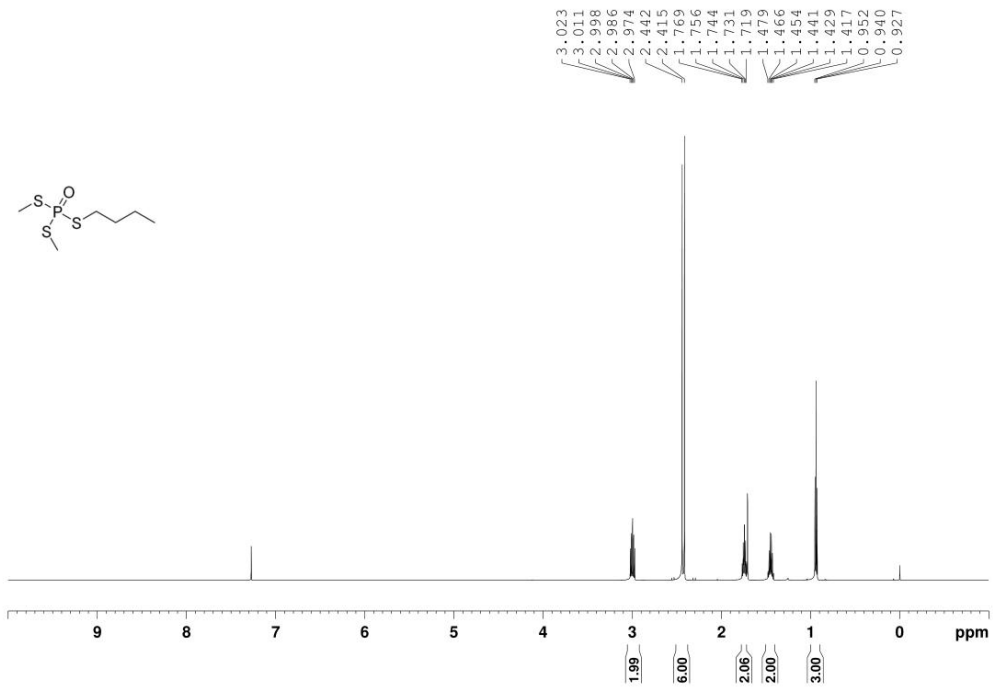

35

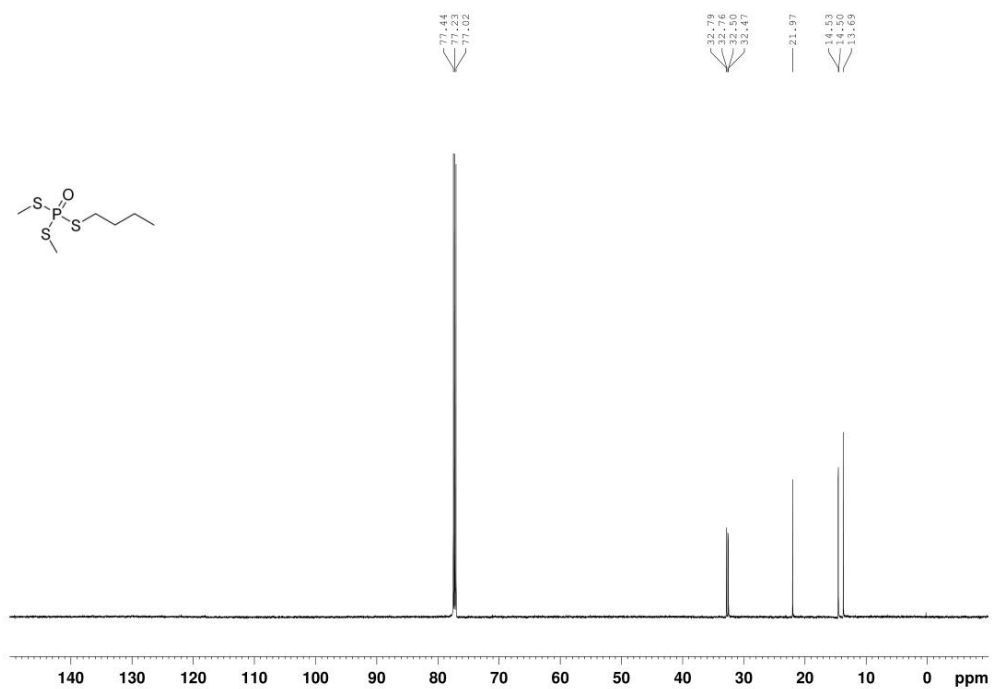

35

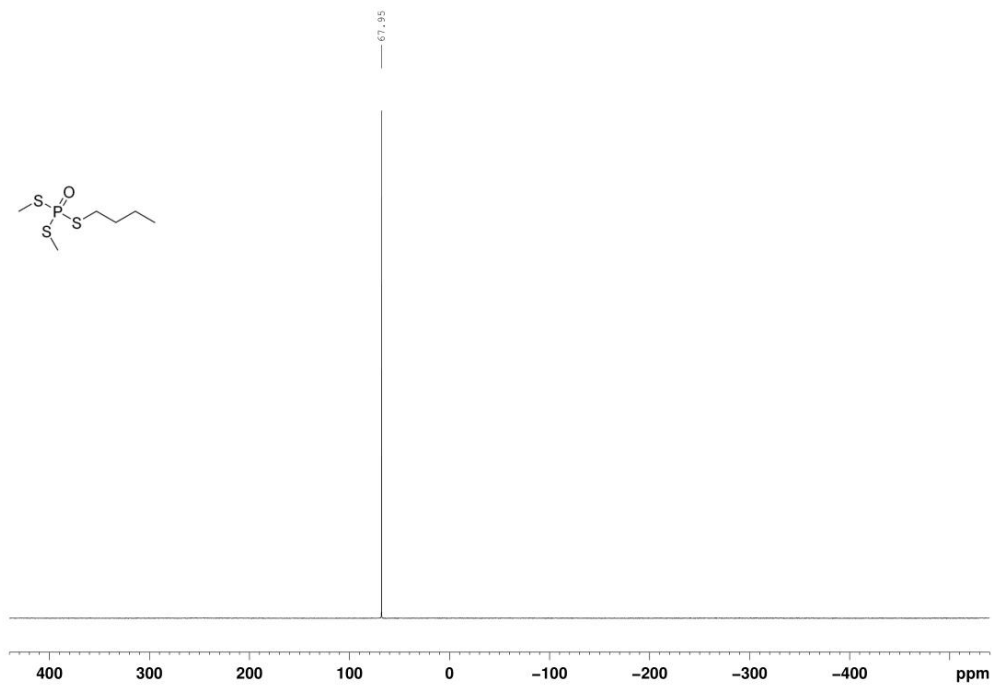



36

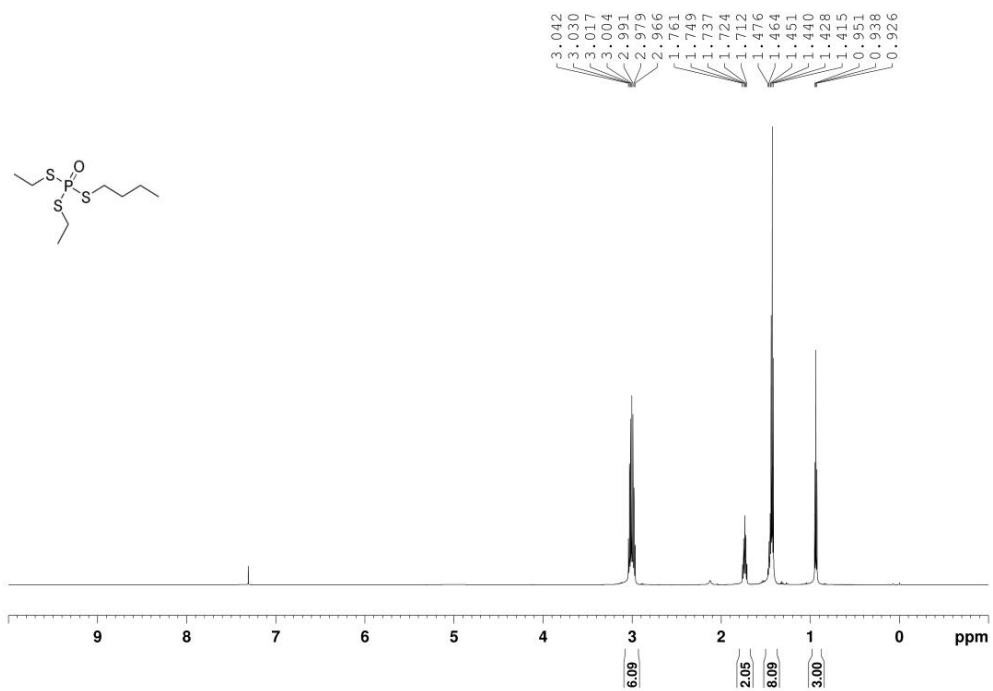

36

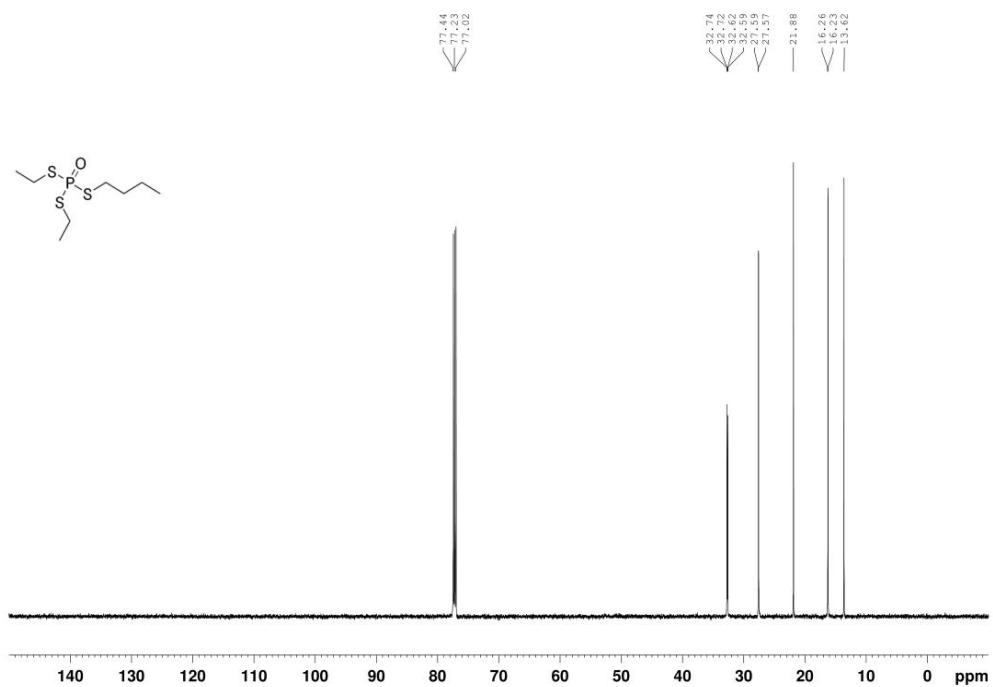

36

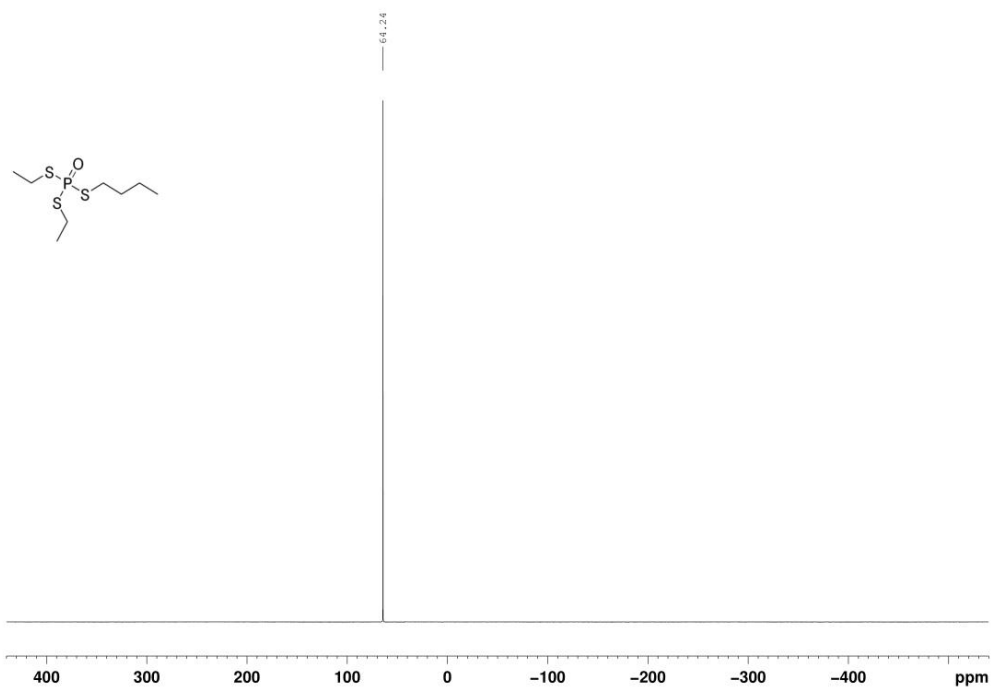

37

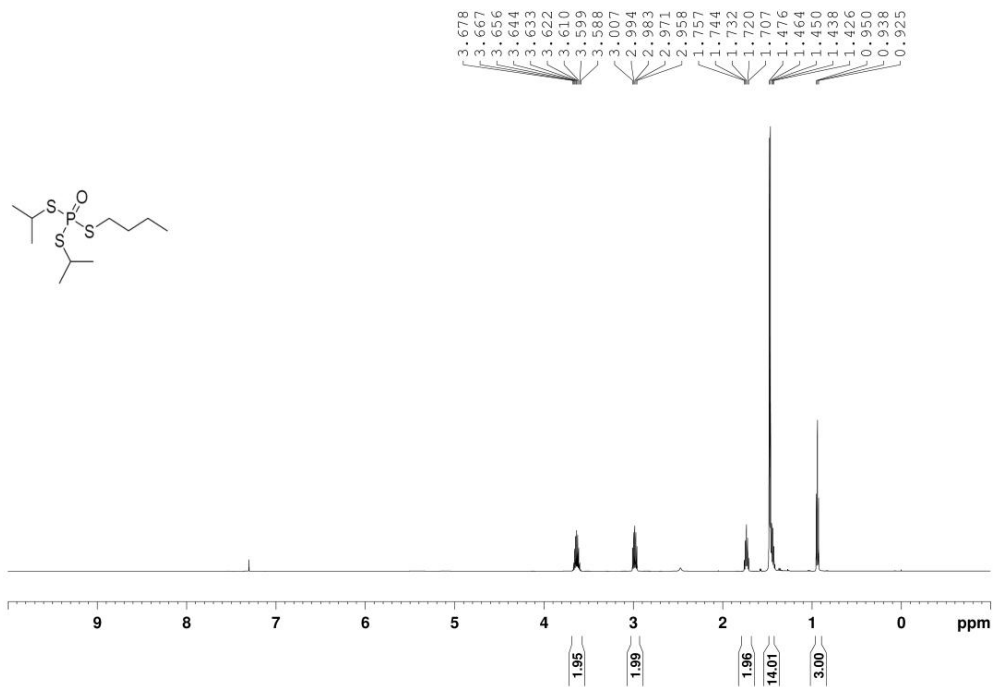

37

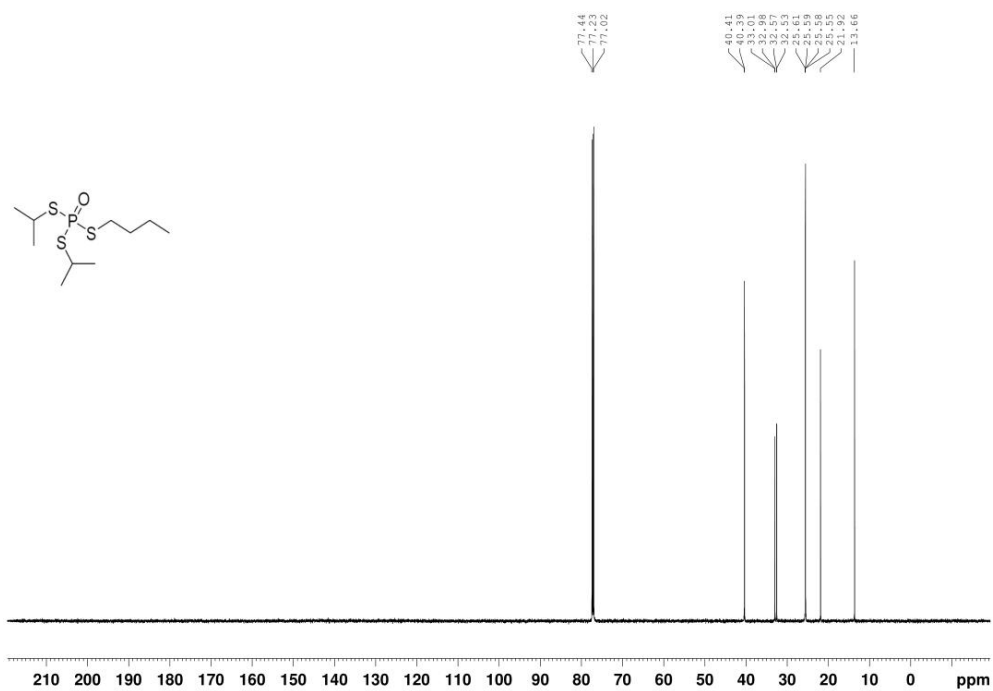

37

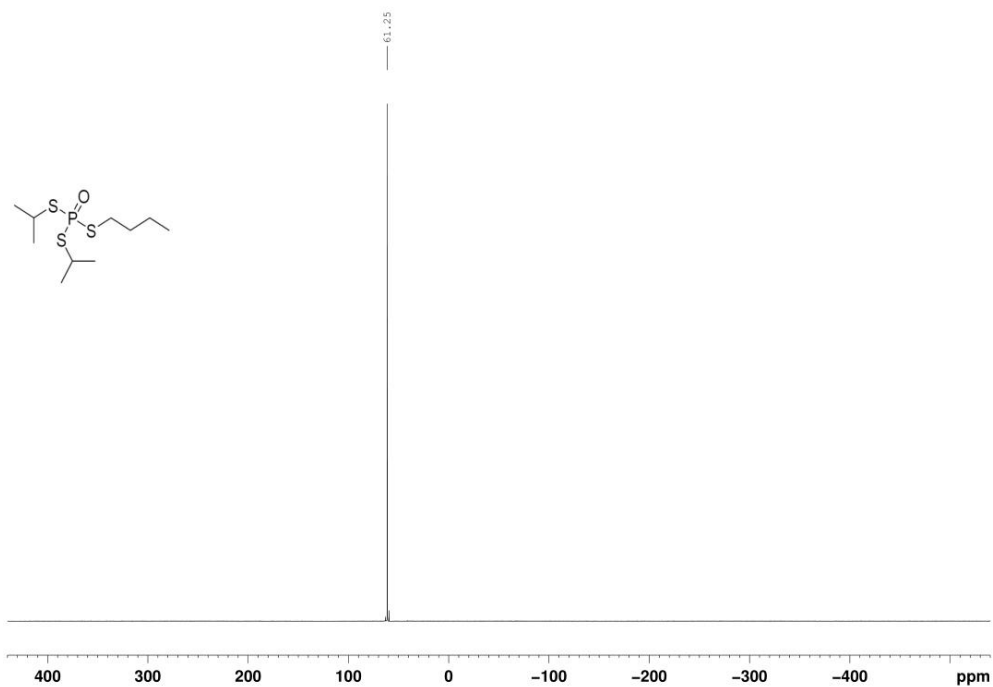

38

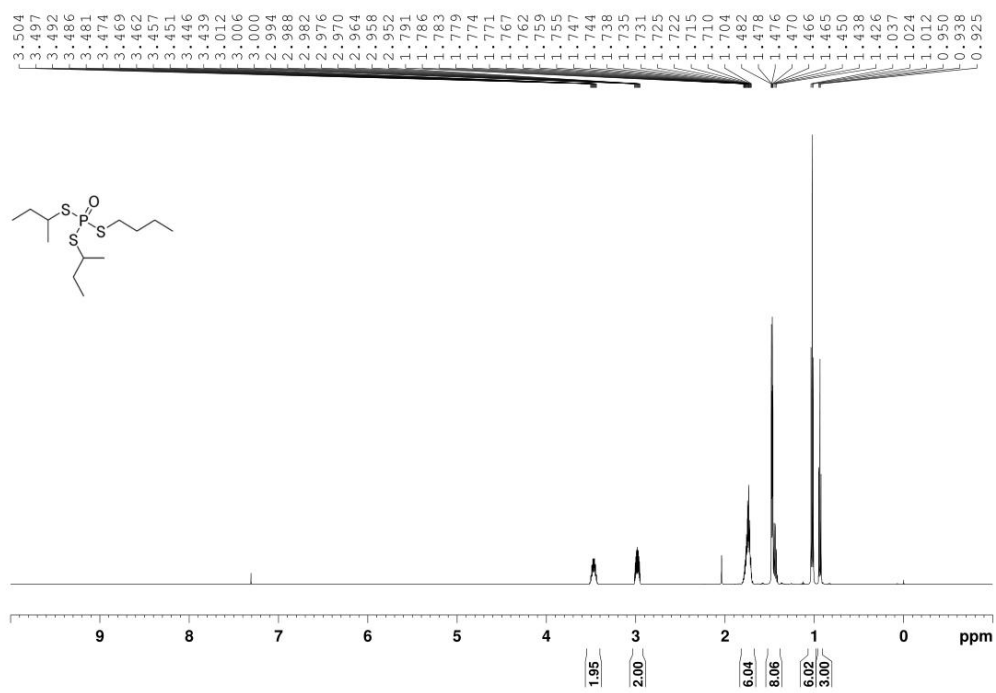

38

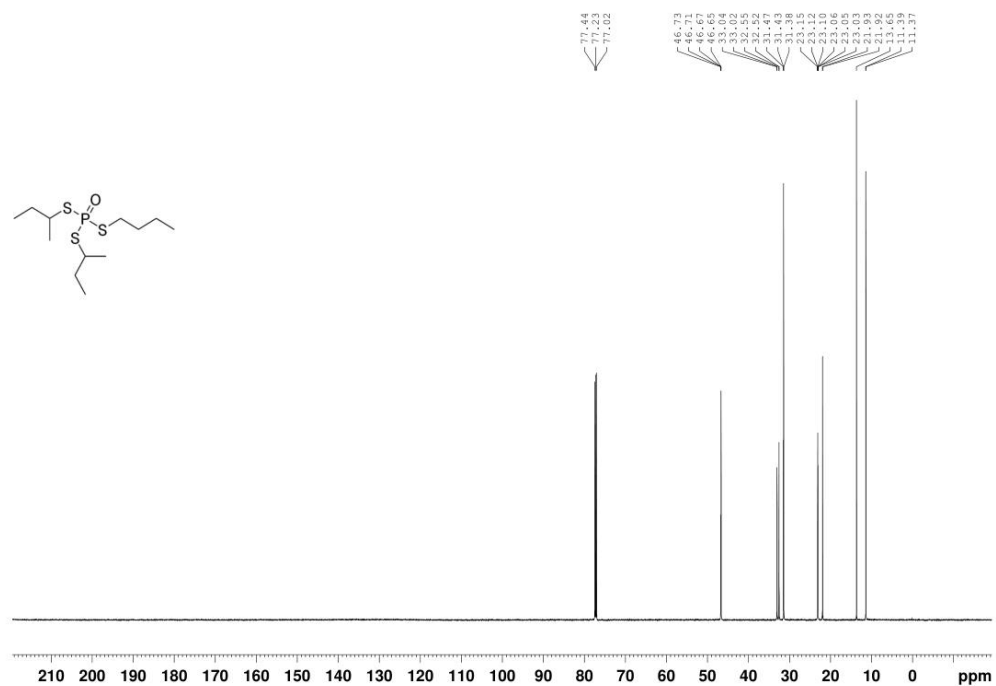

38

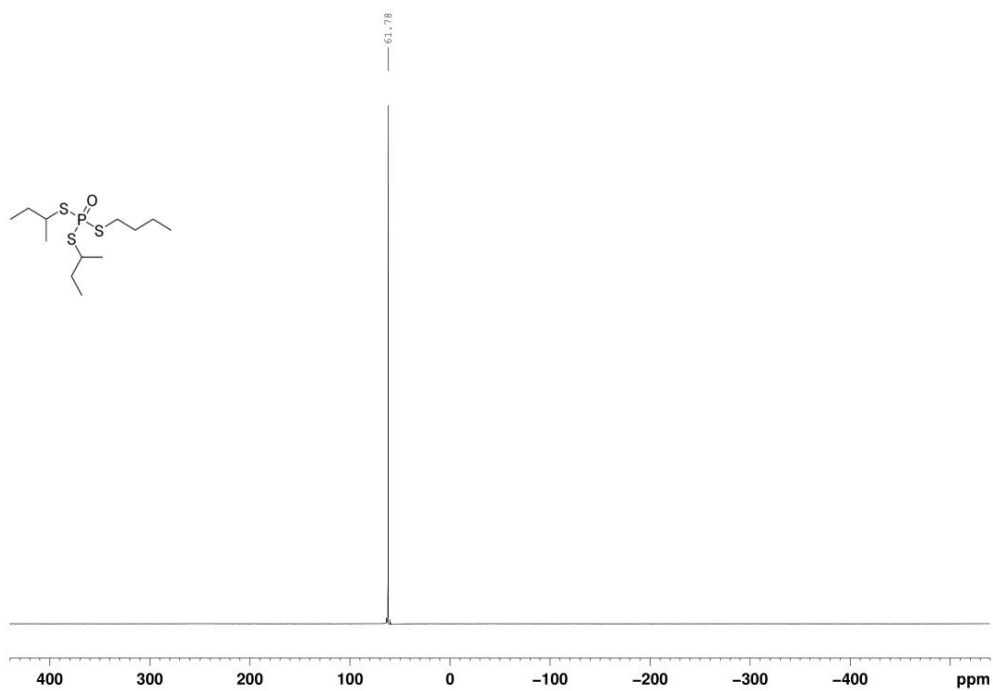

39

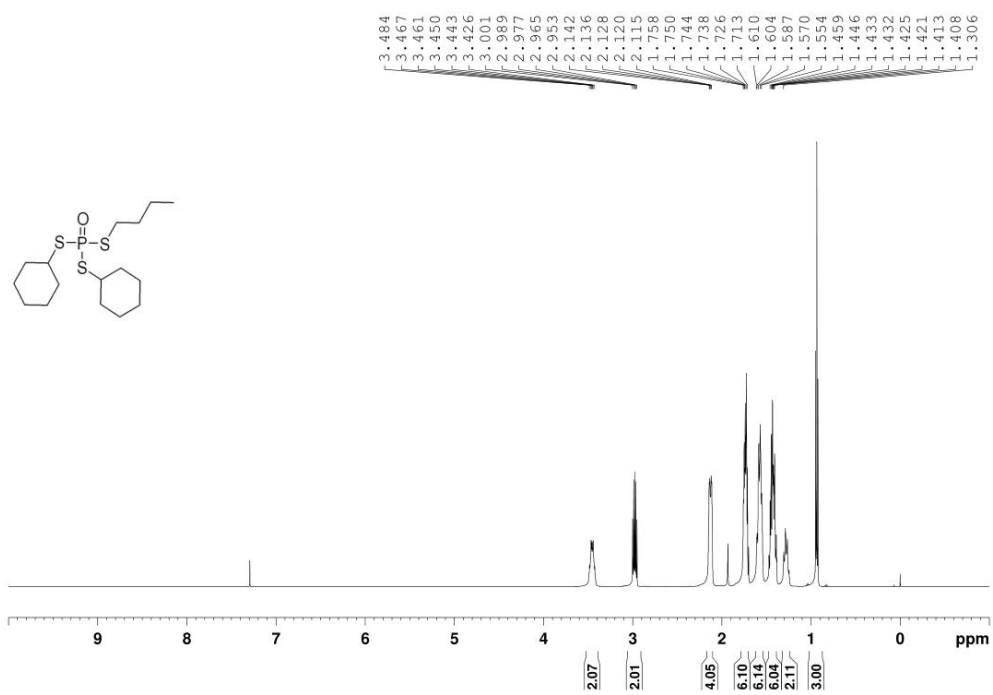

39

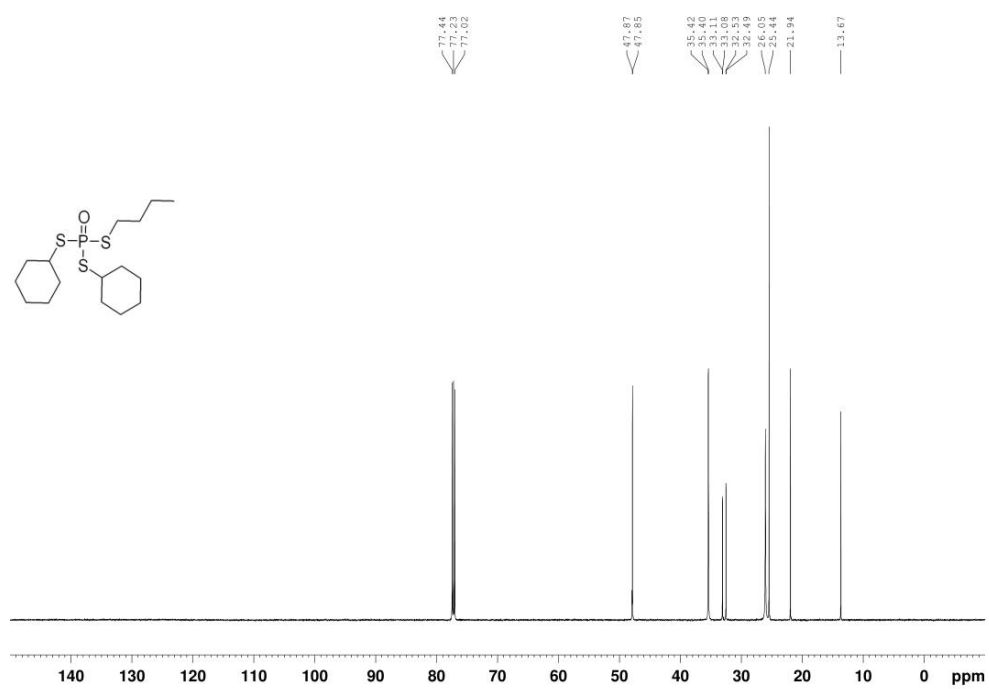

39

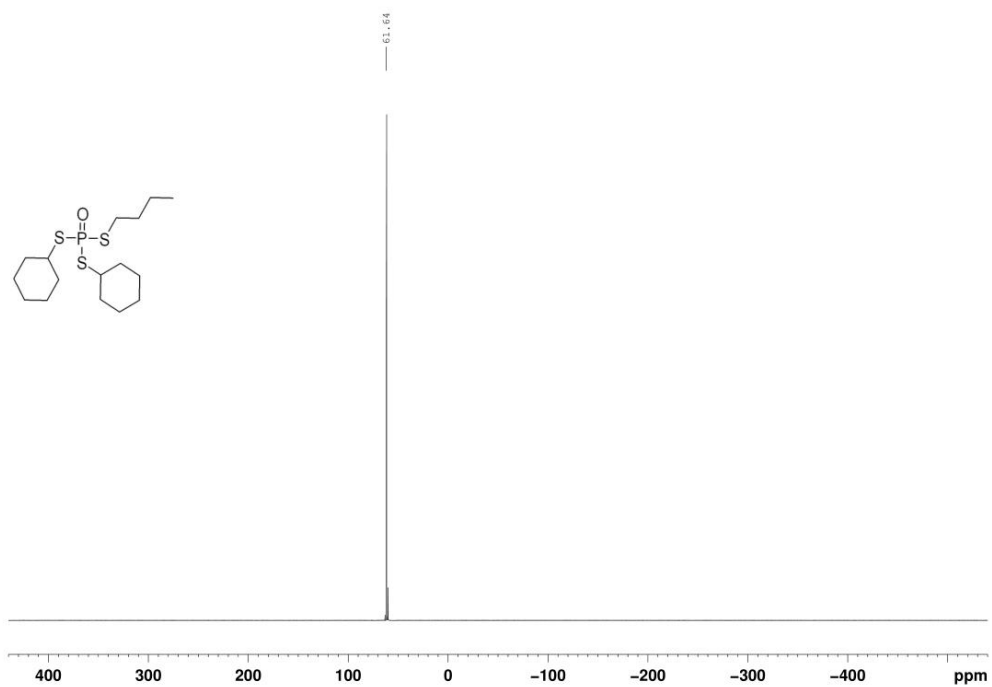

40

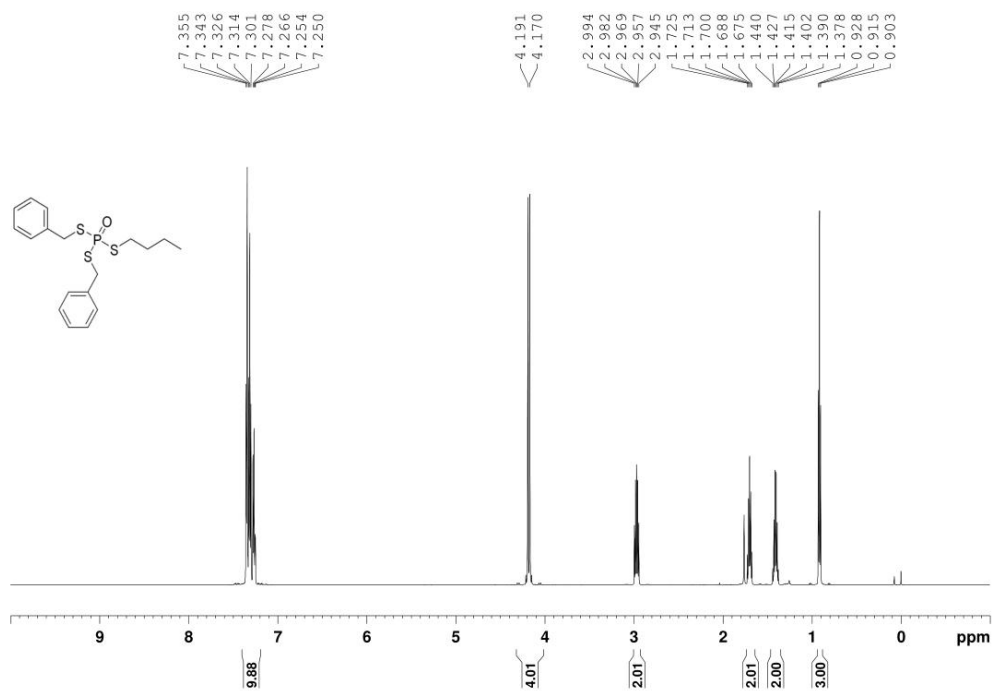

40

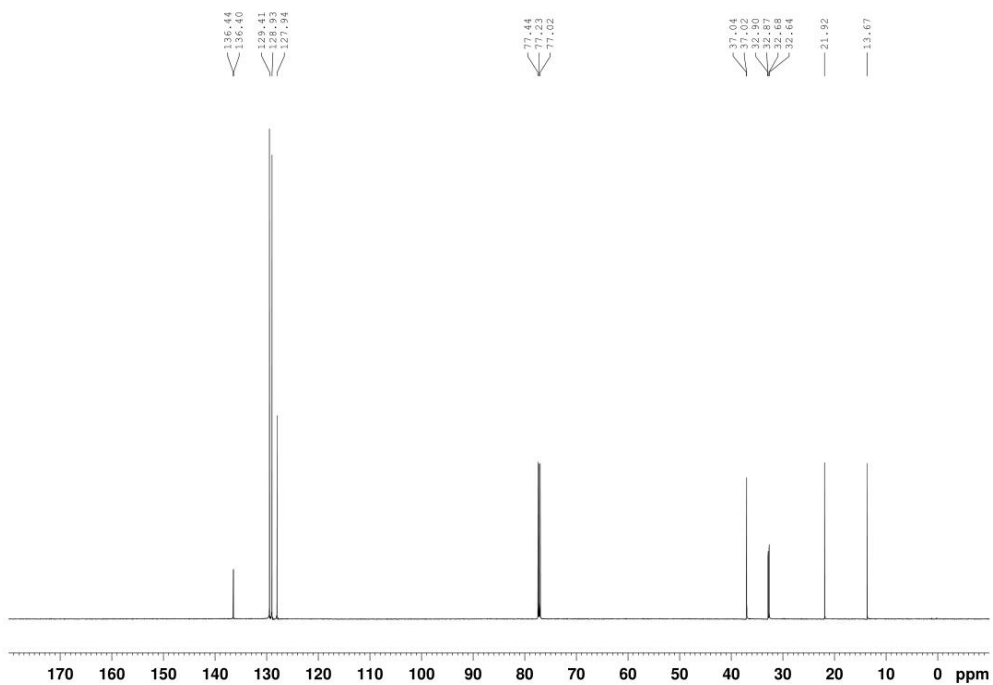

40

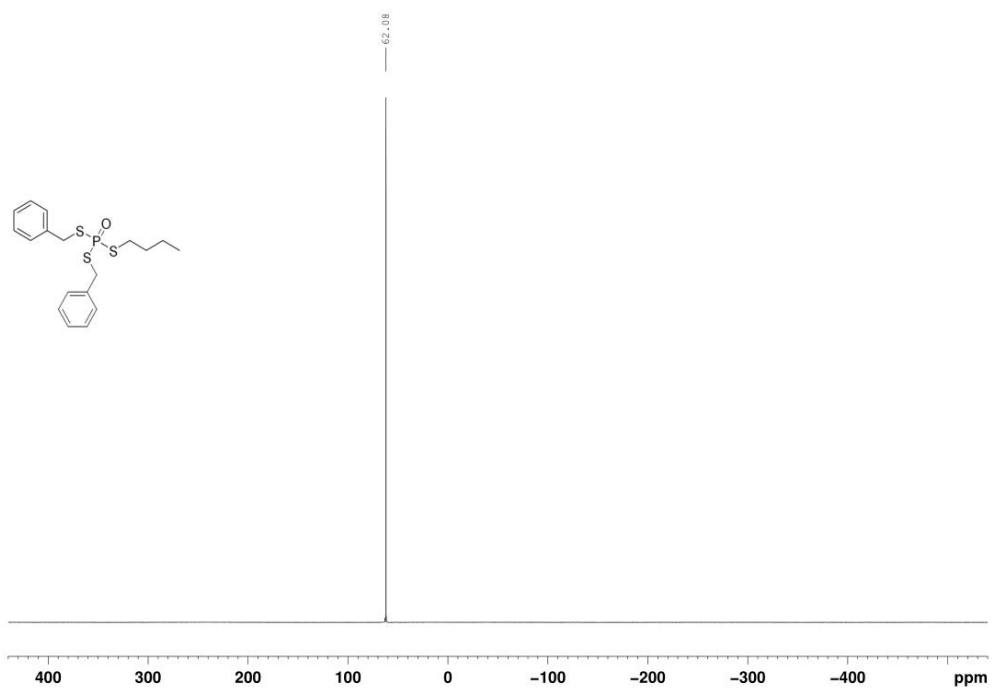

Supplement: d0gc02985h1.pdf [file d0gc02985h1.pdf]
